# Supplementary material for: Humanized mutant FUS drives progressive motor neuron degeneration without aggregation in ‘FUSDelta14’ knockin mice
Source: PubMed Central journal article supplement (PMC5841203; doi:10.1093/brain/awx248), 2017-10-07
Supplement: brain-2017-00604-file008_awx248.pdf [file brain-2017-00604-file008_awx248.pdf]

## Humanised mutant FUS drives progressive motor neuron degeneration without aggregation in 'FUSDelta14' knockin mice

Devoy et al. 2017

### Supplementary Table 1 Expression gene list for 3 months

| external_gene_id | EnsemblID          | log2FoldChange | pvalue   | padj        |
|------------------|--------------------|----------------|----------|-------------|
| Cyp3a13          | ENSMUSG00000029727 | 0.823002616    | 8.54E-07 | 0.025220427 |
| Dnah14           | ENSMUSG00000047369 | 1.932460828    | 2.73E-06 | 0.040361788 |
| Pgm5             | ENSMUSG00000041731 | -0.393681834   | 7.96E-06 | 0.078360778 |

**Humanised mutant FUS drives progressive motor neuron degeneration without aggregation in 'FUSDelta14' knockin mice**

Devoy et al. 2017

**Supplementary Table 2** Expression gene list for 12 months

| external_gene_id | EnsemblID          | log2FoldChange | pvalue      | padj        |
|------------------|--------------------|----------------|-------------|-------------|
| Dlgap2           | ENSMUSG00000047495 | 0.827047655    | 1.42E-06    | 0.015704761 |
| Jkamp            | ENSMUSG00000005078 | -0.335386922   | 2.95E-06    | 0.015704761 |
| 1700029J07Rik    | ENSMUSG00000071103 | -0.4775818     | 4.59E-06    | 0.015704761 |
| 1600020E01Rik    | ENSMUSG00000097048 | -0.727104238   | 5.21E-06    | 0.015704761 |
| Dtymk            | ENSMUSG00000026281 | -0.333959249   | 9.34E-06    | 0.022536207 |
| Tgm2             | ENSMUSG00000037820 | 0.401536935    | 3.27E-05    | 0.048269368 |
| 9230110C19Rik    | ENSMUSG00000053070 | -0.596396307   | 3.78E-05    | 0.048269368 |
| Polr2i           | ENSMUSG00000019738 | -0.421369259   | 4.61E-05    | 0.048269368 |
| Ankrd37          | ENSMUSG00000050914 | -0.6850316     | 4.75E-05    | 0.048269368 |
| A330048O09Rik    | ENSMUSG00000097326 | -0.866495929   | 5.06E-05    | 0.048269368 |
| Gm8104           | ENSMUSG00000096446 | -0.602621085   | 5.20E-05    | 0.048269368 |
| Gm21092          | ENSMUSG00000095403 | -0.419030489   | 5.47E-05    | 0.048269368 |
| Dynlrb1          | ENSMUSG00000047459 | -0.36872205    | 5.56E-05    | 0.048269368 |
| Sdf2             | ENSMUSG00000002064 | -0.341363987   | 5.60E-05    | 0.048269368 |
| Tdgf1            | ENSMUSG00000032494 | -0.764918569   | 6.18E-05    | 0.049698061 |
| Sgk3             | ENSMUSG00000025915 | -0.465485865   | 7.50E-05    | 0.056117292 |
| Caap1            | ENSMUSG00000028578 | -0.476904116   | 7.91E-05    | 0.056117292 |
| Nup98            | ENSMUSG00000063550 | 0.350901453    | 8.98E-05    | 0.060227512 |
| Taf15            | ENSMUSG00000020680 | 0.253288578    | 9.58E-05    | 0.060850942 |
| Prr18            | ENSMUSG00000055945 | -0.277584693   | 0.000107648 | 0.063084744 |
| Efcab1           | ENSMUSG00000068617 | -0.622085483   | 0.000109776 | 0.063084744 |
| Sema3f           | ENSMUSG00000034684 | 0.466224143    | 0.000150658 | 0.079756804 |
| Omg              | ENSMUSG00000049612 | -0.296797415   | 0.00015298  | 0.079756804 |
| Mrps22           | ENSMUSG00000032459 | -0.531567218   | 0.000158615 | 0.079756804 |
| Fuom             | ENSMUSG00000025466 | -0.518114525   | 0.000169291 | 0.081720326 |
| Unc50            | ENSMUSG00000026111 | -0.336828736   | 0.000200332 | 0.087059069 |
| Atg10            | ENSMUSG00000021619 | -0.508292719   | 0.000202303 | 0.087059069 |
| Pex13            | ENSMUSG00000020283 | -0.298513915   | 0.000206082 | 0.087059069 |
| Swap70           | ENSMUSG00000031015 | 0.456015681    | 0.000214186 | 0.087059069 |
| Cst6             | ENSMUSG00000024846 | -0.480130021   | 0.000237783 | 0.087059069 |
| Commd6           | ENSMUSG00000075486 | -0.524271313   | 0.000246107 | 0.087059069 |
| Sypl             | ENSMUSG00000020570 | -0.325837996   | 0.000258842 | 0.087059069 |
| Vwf              | ENSMUSG00000001930 | 0.9173183      | 0.000270758 | 0.087059069 |
| Gm14418          | ENSMUSG00000078867 | -0.77412017    | 0.000275572 | 0.087059069 |
| Tmem208          | ENSMUSG00000014856 | -0.448977898   | 0.000276666 | 0.087059069 |
| Zak              | ENSMUSG00000004085 | 0.374123001    | 0.000278794 | 0.087059069 |
| Tgfb3            | ENSMUSG00000021253 | -0.312564219   | 0.000280722 | 0.087059069 |
| Col6a2           | ENSMUSG00000020241 | 0.820497623    | 0.000283224 | 0.087059069 |
| Adgrf5           | ENSMUSG00000056492 | 0.421957161    | 0.000296033 | 0.087059069 |
| Lamb2            | ENSMUSG00000052911 | 0.691385157    | 0.000311993 | 0.087059069 |
| Med21            | ENSMUSG00000030291 | -0.670884794   | 0.000313344 | 0.087059069 |
| Ptpn14           | ENSMUSG00000026604 | 0.730137878    | 0.000318527 | 0.087059069 |
| Ntn1             | ENSMUSG00000020902 | 0.673974339    | 0.000329781 | 0.087059069 |
| 1110059E24Rik    | ENSMUSG00000035171 | -0.581871756   | 0.000331749 | 0.087059069 |
| Phospho2         | ENSMUSG00000027088 | -0.413743797   | 0.000345971 | 0.087059069 |
| Mthfd2l          | ENSMUSG00000029376 | -0.419825715   | 0.000371513 | 0.087059069 |
| Pantr1           | ENSMUSG00000060424 | -0.500022163   | 0.000378474 | 0.087059069 |
| Tmem251          | ENSMUSG00000046675 | -0.405710992   | 0.000423628 | 0.087059069 |
| Immmp1l          | ENSMUSG00000042670 | -0.664286785   | 0.000427076 | 0.087059069 |
| Spcs2            | ENSMUSG00000035227 | -0.29847896    | 0.000441409 | 0.087059069 |
| Ostc             | ENSMUSG00000041084 | -0.465240713   | 0.000457086 | 0.087059069 |
| Pfdn4            | ENSMUSG00000052033 | -0.733721311   | 0.000459831 | 0.087059069 |
| Gm14403          | ENSMUSG00000094786 | -0.654163806   | 0.000468519 | 0.087059069 |

|                        |                                         |              |             |             |
|------------------------|-----------------------------------------|--------------|-------------|-------------|
| Thrsp                  | ENSMUSG00000035686                      | -0.302031619 | 0.000487554 | 0.087059069 |
| Dpy19I3                | ENSMUSG00000043671                      | 0.301082253  | 0.0004885   | 0.087059069 |
| Ube2w                  | ENSMUSG00000025939                      | -0.437958574 | 0.000493862 | 0.087059069 |
| Cd164I2                | ENSMUSG00000028865                      | -0.524788857 | 0.000497444 | 0.087059069 |
| Mtrf1                  | ENSMUSG00000022022                      | -0.316774167 | 0.000501846 | 0.087059069 |
| Ttpa                   | ENSMUSG00000073988                      | -0.745408502 | 0.000509063 | 0.087059069 |
| Ugt8a                  | ENSMUSG00000032854                      | -0.296564049 | 0.000511472 | 0.087059069 |
| Gm37111                | ENSMUSG000000104494                     | -0.514367263 | 0.00052409  | 0.087059069 |
| Gm1673                 | ENSMUSG00000070858                      | -0.423704535 | 0.000531956 | 0.087059069 |
| Yars2                  | ENSMUSG00000022792                      | -0.290347519 | 0.000538008 | 0.087059069 |
| Mir21a+Vmp1            | ENSMUSG00000065455+ENSMUSG00000018171   | -0.296010031 | 0.000540407 | 0.087059069 |
| Ap4s1                  | ENSMUSG00000020955                      | -0.366180755 | 0.000556916 | 0.087059069 |
| Commd3                 | ENSMUSG00000051154                      | -0.539666901 | 0.000565719 | 0.087059069 |
| Serpinb1a              | ENSMUSG00000044734                      | -0.482932323 | 0.000566188 | 0.087059069 |
| S100a10                | ENSMUSG00000041959                      | -0.596930802 | 0.000585003 | 0.087059069 |
| Gm13340                | ENSMUSG00000083563                      | -0.620754376 | 0.000610056 | 0.087059069 |
| Ernm                   | ENSMUSG00000026830                      | -0.451423953 | 0.000612401 | 0.087059069 |
| Cd24a                  | ENSMUSG00000047139                      | -0.439855895 | 0.000623547 | 0.087059069 |
| Snx16                  | ENSMUSG00000027534                      | -0.374441683 | 0.000630224 | 0.087059069 |
| Slc10a7                | ENSMUSG00000031684                      | -0.326409401 | 0.000640915 | 0.087059069 |
| Styx                   | ENSMUSG00000053205                      | -0.656236977 | 0.000647963 | 0.087059069 |
| Tefm                   | ENSMUSG00000046909                      | -0.565013047 | 0.000653387 | 0.087059069 |
| Higd1b                 | ENSMUSG00000020928                      | -0.621467006 | 0.000653557 | 0.087059069 |
| Fam151b                | ENSMUSG00000034334                      | -0.464249608 | 0.000654688 | 0.087059069 |
| Atp5s                  | ENSMUSG00000054894                      | -0.3769785   | 0.000683253 | 0.087059069 |
| Myof                   | ENSMUSG00000048612                      | 0.463429057  | 0.000684394 | 0.087059069 |
| Atp5f1                 | ENSMUSG00000000563                      | -0.341628373 | 0.000686286 | 0.087059069 |
| Lgals4                 | ENSMUSG00000053964                      | -0.542222841 | 0.000715744 | 0.087059069 |
| Uts2b                  | ENSMUSG00000056423                      | -0.669876305 | 0.000737245 | 0.087059069 |
| Phf13                  | ENSMUSG00000047777                      | 0.474920095  | 0.000739895 | 0.087059069 |
| Mt2                    | ENSMUSG00000031762                      | -0.610871203 | 0.000740504 | 0.087059069 |
| Etv1                   | ENSMUSG00000004151                      | -0.434050397 | 0.000754998 | 0.087059069 |
| Gng13                  | ENSMUSG00000025739                      | -0.647085946 | 0.000759993 | 0.087059069 |
| Erbp3                  | ENSMUSG00000018166                      | 0.453540811  | 0.000762784 | 0.087059069 |
| Serpinb6a              | ENSMUSG00000060147                      | -0.291463243 | 0.000768209 | 0.087059069 |
| Ccnh                   | ENSMUSG00000021548                      | -0.358054731 | 0.000771549 | 0.087059069 |
| Hint2                  | ENSMUSG00000028470                      | -0.52802534  | 0.000774484 | 0.087059069 |
| Al413582               | ENSMUSG00000062753                      | -0.40947405  | 0.000785096 | 0.087059069 |
| Erh                    | ENSMUSG00000021131                      | -0.478543555 | 0.000789541 | 0.087059069 |
| mt-Co3+mt-Atp6+mt-Atp8 | ENSMUSG00000064358+ENSMUSG00000064356+E | -1.759771123 | 0.000805989 | 0.087059069 |
| Ssu72                  | ENSMUSG00000029038                      | -0.401537688 | 0.000820328 | 0.087059069 |
| Slc5a6                 | ENSMUSG00000006641                      | 0.350009195  | 0.000847228 | 0.087059069 |
| Cst3                   | ENSMUSG00000027447                      | -0.390937328 | 0.000862104 | 0.087059069 |
| Itgb3                  | ENSMUSG00000020689                      | 0.610857232  | 0.000865716 | 0.087059069 |
| Cldn10                 | ENSMUSG00000022132                      | -0.378961601 | 0.000868893 | 0.087059069 |
| Polr3b                 | ENSMUSG00000034453                      | 0.343176531  | 0.000873125 | 0.087059069 |
| Col15a1                | ENSMUSG00000028339                      | 0.426256178  | 0.000874387 | 0.087059069 |
| Ugp2                   | ENSMUSG00000001891                      | -0.378339158 | 0.00087599  | 0.087059069 |
| Fus                    | ENSMUSG00000030795                      | 0.325253125  | 0.000876316 | 0.087059069 |
| Crnde                  | ENSMUSG00000031736                      | -0.656954828 | 0.000877184 | 0.087059069 |
| Adgra2                 | ENSMUSG00000031486                      | 0.563685103  | 0.000882307 | 0.087059069 |
| Mir16-1+Dleu2          | ENSMUSG00000097589+ENSMUSG00000092995   | -0.591374848 | 0.000898558 | 0.087059069 |
| Ebpl                   | ENSMUSG00000021928                      | -0.546967498 | 0.000899956 | 0.087059069 |
| Tmem198                | ENSMUSG00000051703                      | 0.359043089  | 0.000904367 | 0.087059069 |
| Dnmbp                  | ENSMUSG00000025195                      | 0.464998625  | 0.000907371 | 0.087059069 |
| mt-Nd6                 | ENSMUSG00000064368                      | -0.91855042  | 0.00090774  | 0.087059069 |
| Serpinb9               | ENSMUSG00000045827                      | -0.462821504 | 0.00090818  | 0.087059069 |
| Dbi                    | ENSMUSG00000026385                      | -0.446459408 | 0.000923056 | 0.087059069 |
| 2610001J05Rik          | ENSMUSG00000052419                      | -0.551314747 | 0.000928459 | 0.087059069 |

|               |                    |              |             |             |
|---------------|--------------------|--------------|-------------|-------------|
| Dars          | ENSMUSG00000026356 | -0.368670062 | 0.00094784  | 0.087059069 |
| Zfp382        | ENSMUSG00000074220 | 0.395687614  | 0.000998213 | 0.087059069 |
| Trappc2l      | ENSMUSG00000015013 | -0.464978843 | 0.001020161 | 0.087059069 |
| Pam16         | ENSMUSG00000014301 | -0.420922024 | 0.001025943 | 0.087059069 |
| Ndufv2        | ENSMUSG00000024099 | -0.53490767  | 0.001029709 | 0.087059069 |
| Med10         | ENSMUSG00000021598 | -0.34205846  | 0.001032692 | 0.087059069 |
| Prdx3         | ENSMUSG00000024997 | -0.271105299 | 0.001045059 | 0.087059069 |
| Tmem256       | ENSMUSG00000070394 | -0.586126642 | 0.001046356 | 0.087059069 |
| Crtap         | ENSMUSG00000032431 | 0.452306918  | 0.001054338 | 0.087059069 |
| Psm1          | ENSMUSG00000030751 | -0.272781944 | 0.001057878 | 0.087059069 |
| Nedd8         | ENSMUSG00000010376 | -0.516368558 | 0.001066991 | 0.087059069 |
| Msmo1         | ENSMUSG00000031604 | -0.264692985 | 0.001073229 | 0.087059069 |
| Uqcr10        | ENSMUSG00000059534 | -0.496106351 | 0.001079869 | 0.087059069 |
| Hopx          | ENSMUSG00000059325 | -0.480853366 | 0.001082497 | 0.087059069 |
| Tmem205       | ENSMUSG00000040883 | -0.44965504  | 0.001099727 | 0.087059069 |
| Txndc17       | ENSMUSG00000020803 | -0.508035191 | 0.001105671 | 0.087059069 |
| Tvp23b        | ENSMUSG00000014177 | -0.410852857 | 0.001107763 | 0.087059069 |
| Ndufa3        | ENSMUSG00000035674 | -0.459806916 | 0.001120987 | 0.087059069 |
| Gramd4        | ENSMUSG00000035900 | 0.301439808  | 0.001128953 | 0.087059069 |
| Fopnl         | ENSMUSG00000022677 | -0.521765002 | 0.00113067  | 0.087059069 |
| Pip4k2b       | ENSMUSG00000018547 | 0.299289981  | 0.001133988 | 0.087059069 |
| Abcb1a        | ENSMUSG00000040584 | 0.41800785   | 0.001135002 | 0.087059069 |
| Bnip3         | ENSMUSG00000078566 | -0.267627962 | 0.001140469 | 0.087059069 |
| Bet1          | ENSMUSG00000032757 | -0.51652558  | 0.001143455 | 0.087059069 |
| Dynll1        | ENSMUSG00000009013 | -0.459982022 | 0.001145043 | 0.087059069 |
| Svbp          | ENSMUSG00000028643 | -0.589196755 | 0.001146715 | 0.087059069 |
| Nop10         | ENSMUSG00000027133 | -0.510139184 | 0.001154201 | 0.087059069 |
| Nt5c1a        | ENSMUSG00000054958 | 0.4619679    | 0.001156115 | 0.087059069 |
| Chac2         | ENSMUSG00000020309 | -0.438521815 | 0.001165331 | 0.087059069 |
| Smurf1        | ENSMUSG00000038780 | 0.481772533  | 0.001178126 | 0.087059069 |
| Gm14295       | ENSMUSG00000078877 | -0.663464582 | 0.001179893 | 0.087059069 |
| Higd1a        | ENSMUSG00000038412 | -0.277270747 | 0.001185427 | 0.087059069 |
| Mterf3        | ENSMUSG00000021519 | -0.352778037 | 0.001200031 | 0.087059069 |
| Zfp277        | ENSMUSG00000055917 | -0.391648682 | 0.001200144 | 0.087059069 |
| Mrpl1         | ENSMUSG00000029486 | -0.471754843 | 0.001202889 | 0.087059069 |
| Supt4a        | ENSMUSG00000020485 | -0.327542658 | 0.001223873 | 0.087059069 |
| Mrpl36        | ENSMUSG00000021607 | -0.338465954 | 0.001232897 | 0.087059069 |
| Mdh1          | ENSMUSG00000020321 | -0.390543959 | 0.001233197 | 0.087059069 |
| Atp6v0e       | ENSMUSG00000015575 | -0.532957896 | 0.00125309  | 0.087059069 |
| Lsm3          | ENSMUSG00000034192 | -0.576491875 | 0.001253943 | 0.087059069 |
| Chmp5         | ENSMUSG00000028419 | -0.447729078 | 0.001257591 | 0.087059069 |
| Mpc1          | ENSMUSG00000023861 | -0.509917379 | 0.00126868  | 0.087059069 |
| Rpe           | ENSMUSG00000026005 | -0.499414547 | 0.001288216 | 0.087059069 |
| Snrnp48       | ENSMUSG00000021431 | -0.390724617 | 0.001304264 | 0.087059069 |
| Echdc1        | ENSMUSG00000019883 | -0.2627989   | 0.001336976 | 0.087059069 |
| Zfp994        | ENSMUSG00000096433 | -0.601206364 | 0.001340528 | 0.087059069 |
| Med6          | ENSMUSG00000002679 | -0.471084484 | 0.00135912  | 0.087059069 |
| Cd300c2       | ENSMUSG00000044811 | -0.528984589 | 0.001364066 | 0.087059069 |
| Cox14         | ENSMUSG00000023020 | -0.425611398 | 0.001371449 | 0.087059069 |
| Nr4a1         | ENSMUSG00000023034 | 0.539005083  | 0.00137432  | 0.087059069 |
| Chchd2        | ENSMUSG00000070493 | -0.497911346 | 0.001376027 | 0.087059069 |
| Gpx4          | ENSMUSG00000075706 | -0.523881285 | 0.001380938 | 0.087059069 |
| Myeov2        | ENSMUSG00000073616 | -0.606960825 | 0.001382006 | 0.087059069 |
| Hsp90aa1      | ENSMUSG00000021270 | -0.221495904 | 0.001384239 | 0.087059069 |
| Me2           | ENSMUSG00000024556 | 0.241711294  | 0.001400156 | 0.087059069 |
| Sucla2        | ENSMUSG00000022110 | -0.322765992 | 0.001407409 | 0.087059069 |
| 2010107E04Rik | ENSMUSG00000021290 | -0.582994247 | 0.001419784 | 0.087059069 |
| 1500011K16Rik | ENSMUSG00000051319 | -0.695388746 | 0.001420848 | 0.087059069 |
| Camkk2        | ENSMUSG00000029471 | 0.380330104  | 0.001422344 | 0.087059069 |

|                         |                                         |              |             |             |
|-------------------------|-----------------------------------------|--------------|-------------|-------------|
| 4930506C21Rik           | ENSMUSG00000087478                      | -0.563020094 | 0.001422493 | 0.087059069 |
| Mtx2                    | ENSMUSG00000027099                      | -0.483068946 | 0.001423551 | 0.087059069 |
| Plekha7                 | ENSMUSG00000045659                      | 0.420588186  | 0.00142598  | 0.087059069 |
| Ramp1                   | ENSMUSG00000034353                      | -0.451472228 | 0.001432285 | 0.087059069 |
| Zfp516                  | ENSMUSG00000058881                      | 0.35102793   | 0.001444181 | 0.087059069 |
| Pex7                    | ENSMUSG00000020003                      | -0.238070063 | 0.00145108  | 0.087059069 |
| 4932411E22Rik           | ENSMUSG00000047773                      | 0.470936448  | 0.001456213 | 0.087059069 |
| Scaf11                  | ENSMUSG00000033228                      | 0.179195491  | 0.001458311 | 0.087059069 |
| Ifrd1                   | ENSMUSG00000001627                      | -0.231637465 | 0.001482334 | 0.087059069 |
| Calcb                   | ENSMUSG00000030666                      | -0.628247022 | 0.001508279 | 0.087059069 |
| Top3a                   | ENSMUSG00000002814                      | 0.445172676  | 0.001509054 | 0.087059069 |
| Smpd3                   | ENSMUSG00000031906                      | 0.369026866  | 0.001510341 | 0.087059069 |
| Atp8a2                  | ENSMUSG00000021983                      | 0.627537373  | 0.001513148 | 0.087059069 |
| Grp                     | ENSMUSG00000024517                      | -0.433622776 | 0.001514476 | 0.087059069 |
| Mog                     | ENSMUSG00000076439                      | -0.225517377 | 0.001514828 | 0.087059069 |
| Usmg5                   | ENSMUSG00000071528                      | -0.563433554 | 0.001515564 | 0.087059069 |
| Fth1                    | ENSMUSG00000024661                      | -0.335713562 | 0.001516895 | 0.087059069 |
| Pvalb                   | ENSMUSG00000005716                      | -0.57200341  | 0.001524402 | 0.087059069 |
| H3f3a                   | ENSMUSG00000060743                      | -0.426200629 | 0.001532727 | 0.087059069 |
| Echdc2                  | ENSMUSG00000028601                      | -0.279854293 | 0.00153518  | 0.087059069 |
| Uqcc2                   | ENSMUSG00000024208                      | -0.548253761 | 0.00153712  | 0.087059069 |
| Taf13                   | ENSMUSG00000048100                      | -0.487025835 | 0.001538219 | 0.087059069 |
| mt-Tw+mt-Nd2            | ENSMUSG00000064346+ENSMUSG00000064345   | -0.440535087 | 0.001563892 | 0.087059069 |
|                         | ENSMUSG00000029333                      | 0.255216475  | 0.001591081 | 0.087059069 |
| Coq2                    | ENSMUSG00000029319                      | -0.327848944 | 0.001594142 | 0.087059069 |
| Fam162a                 | ENSMUSG00000003955                      | -0.529831615 | 0.001599801 | 0.087059069 |
| Sugct                   | ENSMUSG00000055137                      | -0.379401588 | 0.001603825 | 0.087059069 |
| Ddx42                   | ENSMUSG00000020705                      | 0.198095587  | 0.001603829 | 0.087059069 |
| Rnf13                   | ENSMUSG00000036503                      | -0.427160018 | 0.001604043 | 0.087059069 |
| Jrkl                    | ENSMUSG00000079083                      | -0.497367697 | 0.001605267 | 0.087059069 |
| Slc24a3                 | ENSMUSG00000063873                      | 0.286152136  | 0.001606639 | 0.087059069 |
| Grik3                   | ENSMUSG00000001985                      | 0.688054336  | 0.001607595 | 0.087059069 |
| Card10                  | ENSMUSG00000033170                      | 0.339913404  | 0.001615143 | 0.087059069 |
| Cep350                  | ENSMUSG00000033671                      | 0.244902462  | 0.001617237 | 0.087059069 |
| Tmem2                   | ENSMUSG00000024754                      | 0.486306529  | 0.001624305 | 0.087059069 |
| 1810043H04Rik           | ENSMUSG00000078572                      | -0.605122112 | 0.001624522 | 0.087059069 |
| Mrpl48                  | ENSMUSG00000030706                      | -0.319865634 | 0.001631083 | 0.087059069 |
| Cox8a                   | ENSMUSG00000035885                      | -0.310670788 | 0.001641072 | 0.087059069 |
| Bdh2                    | ENSMUSG00000028167                      | -0.474427262 | 0.001643747 | 0.087059069 |
| Plekhg2                 | ENSMUSG00000037552                      | 0.51081429   | 0.00164601  | 0.087059069 |
| Rnf7                    | ENSMUSG00000051234                      | -0.418089612 | 0.001646395 | 0.087059069 |
| Dgkg                    | ENSMUSG00000022861                      | 0.356634136  | 0.001658703 | 0.087059069 |
| Sdcbp                   | ENSMUSG00000028249                      | -0.391888313 | 0.001670816 | 0.087059069 |
| Gira1                   | ENSMUSG0000000263                       | 0.661404184  | 0.001688663 | 0.087059069 |
| Nf1                     | ENSMUSG00000020716                      | 0.338283942  | 0.001690673 | 0.087059069 |
| Pdcd5                   | ENSMUSG00000030417                      | -0.529330739 | 0.001701005 | 0.087059069 |
| Fpgt                    | ENSMUSG00000053870                      | -0.370504332 | 0.001705224 | 0.087059069 |
| 2610021A01Rik           | ENSMUSG00000091474                      | -0.391976868 | 0.001712167 | 0.087059069 |
| Rps29                   | ENSMUSG00000034892                      | -0.505178314 | 0.001713774 | 0.087059069 |
| Pfkfb4                  | ENSMUSG00000025648                      | 0.329199509  | 0.001727608 | 0.087059069 |
| Ccdc85c                 | ENSMUSG00000084883                      | 0.251990673  | 0.001727832 | 0.087059069 |
| Pfdn1                   | ENSMUSG00000024346                      | -0.520216668 | 0.001742102 | 0.087059069 |
| Cnbp                    | ENSMUSG00000030057                      | -0.338360842 | 0.001744078 | 0.087059069 |
| Timm8b                  | ENSMUSG00000039016                      | -0.590725185 | 0.001746936 | 0.087059069 |
| Psemb7                  | ENSMUSG00000026750                      | -0.406451802 | 0.001754949 | 0.087059069 |
| Idi1                    | ENSMUSG00000058258                      | -0.387609086 | 0.001758826 | 0.087059069 |
| Zscan20                 | ENSMUSG00000061894                      | 0.538954473  | 0.001770971 | 0.087059069 |
| Gm27505+Gm27533+Gm27534 | ENSMUSG00000098543+ENSMUSG00000092274+E | -0.275028983 | 0.00178969  | 0.087059069 |
| Tex30+Kdelc1+Gm29247    | ENSMUSG00000026047+ENSMUSG00000026049+E | -0.327538737 | 0.001793769 | 0.087059069 |

|                       |                                         |              |             |             |
|-----------------------|-----------------------------------------|--------------|-------------|-------------|
| Nsmce1                | ENSMUSG00000030750                      | -0.353473924 | 0.001795527 | 0.087059069 |
| Lamc1                 | ENSMUSG00000026478                      | 0.555501213  | 0.001812509 | 0.087059069 |
| Gstm5                 | ENSMUSG00000004032                      | -0.523626261 | 0.001814382 | 0.087059069 |
| Fbn1                  | ENSMUSG00000027204                      | 0.626775075  | 0.001815801 | 0.087059069 |
| Mgst1                 | ENSMUSG00000008540                      | -0.653729871 | 0.001818154 | 0.087059069 |
| Mrpl52                | ENSMUSG00000010406                      | -0.451348494 | 0.001828206 | 0.087059069 |
| Cox7a2                | ENSMUSG00000032330                      | -0.608345191 | 0.001843997 | 0.087059069 |
| Tmem258               | ENSMUSG00000036372                      | -0.543863168 | 0.001851466 | 0.087059069 |
| Gtf2b                 | ENSMUSG00000028271                      | -0.418916238 | 0.001852185 | 0.087059069 |
| Ticam2+Tmed7          | ENSMUSG00000033184+ENSMUSG00000056130   | -0.455752198 | 0.0018556   | 0.087059069 |
| A930005H10Rik         | ENSMUSG00000054426                      | -0.297148513 | 0.001856061 | 0.087059069 |
| Cops5                 | ENSMUSG00000025917                      | -0.322764721 | 0.001860448 | 0.087059069 |
| Coa6                  | ENSMUSG00000051671                      | -0.54997013  | 0.001868803 | 0.087059069 |
| Adk                   | ENSMUSG00000039197                      | -0.34849863  | 0.001872876 | 0.087059069 |
| Nit2                  | ENSMUSG00000022751                      | -0.399801357 | 0.001873231 | 0.087059069 |
| 1110032A03Rik         | ENSMUSG00000037971                      | -0.417583341 | 0.001877022 | 0.087059069 |
| Gabrg1                | ENSMUSG00000001260                      | -0.603413226 | 0.001886279 | 0.087059069 |
| Mns1                  | ENSMUSG00000032221                      | -0.451562609 | 0.001915827 | 0.087059069 |
| Cep162                | ENSMUSG00000056919                      | 0.211146057  | 0.001919047 | 0.087059069 |
| Pdgfd                 | ENSMUSG00000032006                      | -0.378954424 | 0.001942918 | 0.087059069 |
| Atraid                | ENSMUSG00000013622                      | -0.256870843 | 0.001953828 | 0.087059069 |
| Amn1                  | ENSMUSG00000068250                      | -0.554032344 | 0.001956575 | 0.087059069 |
| Mrpl13                | ENSMUSG00000022370                      | -0.429753559 | 0.001956896 | 0.087059069 |
| Spryd7                | ENSMUSG00000021930                      | -0.426399021 | 0.001957397 | 0.087059069 |
| Atp6v1d               | ENSMUSG00000021114                      | -0.252066186 | 0.001958435 | 0.087059069 |
| mt-Rnr1               | ENSMUSG00000064337                      | -0.508232579 | 0.001962074 | 0.087059069 |
| Nol4l                 | ENSMUSG00000061411                      | 0.498926988  | 0.001968347 | 0.087059069 |
| Gtf2ird1              | ENSMUSG00000023079                      | 0.481803922  | 0.001972218 | 0.087059069 |
| Ndufs4                | ENSMUSG00000021764                      | -0.611455834 | 0.001991828 | 0.087059069 |
| Tyw5                  | ENSMUSG00000048495                      | -0.523558773 | 0.001999331 | 0.087059069 |
| Msantd4               | ENSMUSG00000041124                      | -0.206234516 | 0.002021398 | 0.087059069 |
| Fcf1                  | ENSMUSG00000021243                      | -0.542588624 | 0.002045689 | 0.087059069 |
| Postn                 | ENSMUSG00000027750                      | -0.58897619  | 0.002047996 | 0.087059069 |
| Cenpq                 | ENSMUSG00000023919                      | -0.593074048 | 0.002050598 | 0.087059069 |
| Gm16534+Fam78a        | ENSMUSG00000090157+ENSMUSG00000050592   | 0.506202424  | 0.002052742 | 0.087059069 |
| Rpl22l1               | ENSMUSG00000039221                      | -0.660200427 | 0.002052893 | 0.087059069 |
| Mrpl30                | ENSMUSG00000026087                      | -0.528680259 | 0.002061627 | 0.087059069 |
| Ttc33                 | ENSMUSG00000022151                      | -0.341058469 | 0.002088546 | 0.087059069 |
| Ndufc2                | ENSMUSG00000030647                      | -0.57161794  | 0.002100388 | 0.087059069 |
| Gng10+Gm20503+Dnajc25 | ENSMUSG00000038607+ENSMUSG00000070972+E | -0.496205161 | 0.002102681 | 0.087059069 |
| Eif3m                 | ENSMUSG00000027170                      | -0.567578107 | 0.002102792 | 0.087059069 |
| Fam96b                | ENSMUSG00000031879                      | -0.369814294 | 0.002113641 | 0.087059069 |
| Rps26                 | ENSMUSG00000025362                      | -0.450574002 | 0.002129534 | 0.087059069 |
| Atpif1                | ENSMUSG00000054428                      | -0.509640856 | 0.002139207 | 0.087059069 |
| Fam213b               | ENSMUSG00000029059                      | -0.534313486 | 0.002145595 | 0.087059069 |
| Gm27941+Crot          | ENSMUSG0000003623+ENSMUSG00000099209    | -0.291903175 | 0.002157638 | 0.087059069 |
| Cox7c                 | ENSMUSG00000017778                      | -0.521871179 | 0.002163447 | 0.087059069 |
| Arl6ip1               | ENSMUSG00000030654                      | -0.225904796 | 0.002173937 | 0.087059069 |
| Pakap+Akap2+Palm2     | ENSMUSG00000089945+ENSMUSG00000090053+E | 0.307177976  | 0.002185768 | 0.087059069 |
| Polr2l                | ENSMUSG00000038489                      | -0.342408721 | 0.002193675 | 0.087059069 |
| Crls1                 | ENSMUSG00000027357                      | -0.364633627 | 0.002201586 | 0.087059069 |
| Ndufb5                | ENSMUSG00000027673                      | -0.403985891 | 0.002203413 | 0.087059069 |
| Hspa13                | ENSMUSG00000032932                      | -0.3137879   | 0.002206189 | 0.087059069 |
| Psmb1                 | ENSMUSG00000014769                      | -0.401958131 | 0.002217452 | 0.087059069 |
| Snapc5                | ENSMUSG00000032398                      | -0.506020191 | 0.002228652 | 0.087059069 |
| Aimp1                 | ENSMUSG00000028029                      | -0.357651531 | 0.002257453 | 0.087059069 |
| A430035B10Rik         | ENSMUSG00000087305                      | -0.502494563 | 0.002274628 | 0.087059069 |
| Ccdc85b               | ENSMUSG00000095098                      | -0.326958988 | 0.002281658 | 0.087059069 |
| Cox6a1                | ENSMUSG00000041697                      | -0.327495368 | 0.002290441 | 0.087059069 |

|               |                                       |              |             |             |
|---------------|---------------------------------------|--------------|-------------|-------------|
| Chchd3        | ENSMUSG00000053768                    | -0.44316207  | 0.002298794 | 0.087059069 |
| Cox5b         | ENSMUSG00000061518                    | -0.282784433 | 0.002306281 | 0.087059069 |
| Dhrs7b        | ENSMUSG00000042569                    | -0.32540904  | 0.002318413 | 0.087059069 |
| Pts           | ENSMUSG00000032067                    | -0.485969273 | 0.002318613 | 0.087059069 |
| Hist1h2bc     | ENSMUSG00000018102                    | -0.496349664 | 0.002325155 | 0.087059069 |
| Sepp1         | ENSMUSG00000064373                    | -0.386031805 | 0.002325903 | 0.087059069 |
| Lsm7          | ENSMUSG00000035215                    | -0.477699102 | 0.002326005 | 0.087059069 |
| Selk          | ENSMUSG00000042682                    | -0.450319147 | 0.002335071 | 0.087059069 |
| Ccdc153       | ENSMUSG00000070306                    | -0.539249    | 0.002346539 | 0.087059069 |
| Atp5h         | ENSMUSG00000034566                    | -0.446351354 | 0.002350804 | 0.087059069 |
| Spock3        | ENSMUSG00000054162                    | -0.437908216 | 0.002356324 | 0.087059069 |
| Rab28         | ENSMUSG00000029128                    | -0.412194881 | 0.002361026 | 0.087059069 |
| Acyp2         | ENSMUSG00000060923                    | -0.573301435 | 0.002361342 | 0.087059069 |
| Nenf          | ENSMUSG00000037499                    | -0.437361588 | 0.00236485  | 0.087059069 |
| 2310009B15Rik | ENSMUSG00000079283                    | -0.454831474 | 0.002369441 | 0.087059069 |
| Col1a1        | ENSMUSG00000001506                    | 0.949749936  | 0.002385363 | 0.087059069 |
| Lims1         | ENSMUSG00000019920                    | -0.268961726 | 0.002386745 | 0.087059069 |
| Svip          | ENSMUSG00000074093                    | -0.501889803 | 0.002388232 | 0.087059069 |
| Ppargc1b      | ENSMUSG00000033871                    | 0.757455647  | 0.002396437 | 0.087059069 |
| Mir682+Gm4149 | ENSMUSG00000074800+ENSMUSG00000076236 | -0.655604342 | 0.002398845 | 0.087059069 |
| Gm44250       | ENSMUSG00000107881                    | -0.375447196 | 0.002399757 | 0.087059069 |
| Mfsd8         | ENSMUSG00000025759                    | -0.294138808 | 0.002399873 | 0.087059069 |
| Ndufa4        | ENSMUSG00000029632                    | -0.531359016 | 0.00241074  | 0.087059069 |
| mt-Rnr2       | ENSMUSG00000064339                    | -0.517787714 | 0.002417334 | 0.087059069 |
| 9330132A10Rik | ENSMUSG00000043498                    | -0.570951302 | 0.002426058 | 0.087059069 |
| Ormdl2        | ENSMUSG00000025353                    | -0.452394539 | 0.002427952 | 0.087059069 |
| Rap1b         | ENSMUSG00000052681                    | -0.327497292 | 0.002436895 | 0.087059069 |
| Glg1          | ENSMUSG00000003316                    | 0.501619146  | 0.002449437 | 0.087059069 |
| 0610009B22Rik | ENSMUSG00000007777                    | -0.550638084 | 0.002452604 | 0.087059069 |
| Haus1         | ENSMUSG00000041840                    | -0.334583063 | 0.002452892 | 0.087059069 |
| Prdx1         | ENSMUSG00000028691                    | -0.535520426 | 0.002463059 | 0.087059069 |
| Bbs9          | ENSMUSG00000035919                    | 0.341246949  | 0.00246389  | 0.087059069 |
| Rps27         | ENSMUSG00000090733                    | -0.555397299 | 0.002465521 | 0.087059069 |
| mt-Ti+mt-Nd1  | ENSMUSG00000064342+ENSMUSG00000064341 | -0.436674181 | 0.002469384 | 0.087059069 |
| Scp2          | ENSMUSG00000028603                    | -0.355415435 | 0.002479373 | 0.087059069 |
| Alg14         | ENSMUSG00000039887                    | -0.313972691 | 0.002484719 | 0.087059069 |
| Fam174a       | ENSMUSG00000051185                    | -0.44985293  | 0.002486991 | 0.087059069 |
| Mphosph10     | ENSMUSG00000030521                    | -0.419052999 | 0.002492725 | 0.087059069 |
| Cmtm5         | ENSMUSG00000040759                    | -0.214191416 | 0.002496409 | 0.087059069 |
| Cnep1r1       | ENSMUSG00000036810                    | -0.37241534  | 0.002502093 | 0.087059069 |
| Capza2        | ENSMUSG00000015733                    | -0.461622315 | 0.002515274 | 0.087059069 |
| Pdzd2         | ENSMUSG00000022197                    | 0.60674184   | 0.002529049 | 0.087059069 |
| Rpf2          | ENSMUSG00000038510                    | -0.438774338 | 0.002533482 | 0.087059069 |
| 1810037117Rik | ENSMUSG00000054091                    | -0.481978976 | 0.002535356 | 0.087059069 |
| Zfp24         | ENSMUSG00000051469                    | -0.330367481 | 0.002556707 | 0.087059069 |
| Arl6          | ENSMUSG00000022722                    | -0.468494788 | 0.002558404 | 0.087059069 |
| Bud31         | ENSMUSG00000038722                    | -0.441764634 | 0.002558801 | 0.087059069 |
| Cacybp        | ENSMUSG00000014226                    | -0.506046276 | 0.002561649 | 0.087059069 |
| Scube1        | ENSMUSG00000016763                    | 0.611446777  | 0.002571821 | 0.087059069 |
| Suv39h2       | ENSMUSG00000026646                    | -0.361505214 | 0.002578193 | 0.087059069 |
| Pex2          | ENSMUSG00000040374                    | -0.494261038 | 0.002586337 | 0.087059069 |
| Ndufa2        | ENSMUSG00000014294                    | -0.565083835 | 0.002595015 | 0.087059069 |
| Smim15        | ENSMUSG00000071180                    | -0.562234455 | 0.002603617 | 0.087059069 |
| Rpl31         | ENSMUSG00000073702                    | -0.573347097 | 0.002614826 | 0.087059069 |
| Hibch         | ENSMUSG00000041426                    | -0.351213044 | 0.002617159 | 0.087059069 |
| Psma6         | ENSMUSG00000021024                    | -0.400267868 | 0.002618988 | 0.087059069 |
| Them4         | ENSMUSG00000028145                    | -0.409298462 | 0.002619106 | 0.087059069 |
| Celrr         | ENSMUSG00000097881                    | -0.455819933 | 0.002620241 | 0.087059069 |
| Rgs10         | ENSMUSG00000030844                    | -0.333016942 | 0.00262093  | 0.087059069 |

|                      |                                         |              |             |             |
|----------------------|-----------------------------------------|--------------|-------------|-------------|
| Sys1+Gm20458+Dbnidd2 | ENSMUSG00000017734+ENSMUSG00000090996+E | -0.350331912 | 0.002622915 | 0.087059069 |
| Ubap2l               | ENSMUSG00000042520                      | 0.368163631  | 0.002624862 | 0.087059069 |
| Hat1                 | ENSMUSG00000027018                      | -0.334135494 | 0.002626913 | 0.087059069 |
| Serf1                | ENSMUSG00000021643                      | -0.559407418 | 0.002642142 | 0.087059069 |
| Cln6                 | ENSMUSG00000032245                      | 0.355045899  | 0.002643489 | 0.087059069 |
| Nudt7                | ENSMUSG00000031767                      | -0.347586309 | 0.00265838  | 0.087059069 |
| Mcee                 | ENSMUSG00000033429                      | -0.514711709 | 0.00266202  | 0.087059069 |
| Rgcc                 | ENSMUSG00000022018                      | -0.435244338 | 0.002672081 | 0.087059069 |
| Gnpda2               | ENSMUSG00000029209                      | -0.530391665 | 0.002677223 | 0.087059069 |
| 2810402E24Rik        | ENSMUSG00000099966                      | -0.464471244 | 0.002685367 | 0.087059069 |
| Atp5j2               | ENSMUSG00000038690                      | -0.615990024 | 0.002685724 | 0.087059069 |
| Pma5                 | ENSMUSG00000068749                      | -0.280198859 | 0.002686357 | 0.087059069 |
| Fdx1l                | ENSMUSG00000079677                      | -0.470435003 | 0.002686902 | 0.087059069 |
| Gm43511+Mrps18c      | ENSMUSG00000104761+ENSMUSG00000016833   | -0.643582774 | 0.002693301 | 0.087059069 |
| Zfp367               | ENSMUSG00000044934                      | -0.392121065 | 0.00270071  | 0.087059069 |
| Il6st                | ENSMUSG00000021756                      | 0.284219753  | 0.002702255 | 0.087059069 |
| Dio2                 | ENSMUSG00000007682                      | -0.464580655 | 0.002709091 | 0.087059069 |
| Cox6c                | ENSMUSG00000014313                      | -0.554092475 | 0.002714015 | 0.087059069 |
| Tmed5                | ENSMUSG00000063406                      | -0.604307811 | 0.002715397 | 0.087059069 |
| Zfp52                | ENSMUSG00000051341                      | -0.411174141 | 0.002716795 | 0.087059069 |
| Ndufa7               | ENSMUSG00000041881                      | -0.391084276 | 0.002732227 | 0.087059069 |
| Sik1                 | ENSMUSG00000024042                      | 0.549324497  | 0.002735957 | 0.087059069 |
| Smim1                | ENSMUSG00000078350                      | -0.313034718 | 0.002763576 | 0.087059069 |
| Polr2k               | ENSMUSG00000045996                      | -0.666619959 | 0.002774617 | 0.087059069 |
| Cox6b1               | ENSMUSG00000036751                      | -0.413729881 | 0.00277762  | 0.087059069 |
| Exoc3l4              | ENSMUSG00000021280                      | 0.460295495  | 0.002789745 | 0.087059069 |
| Tenm3                | ENSMUSG00000031561                      | 0.581672067  | 0.002791505 | 0.087059069 |
| Serpinb1b            | ENSMUSG00000051029                      | -0.45087612  | 0.002801359 | 0.087059069 |
| Tmem219              | ENSMUSG00000060538                      | -0.248286384 | 0.00280271  | 0.087059069 |
| Kirrel3              | ENSMUSG00000032036                      | 0.335723266  | 0.002804488 | 0.087059069 |
| Tmem229a             | ENSMUSG00000048022                      | -0.387762496 | 0.002808488 | 0.087059069 |
| 1110008P14Rik        | ENSMUSG00000039195                      | -0.320016163 | 0.002816537 | 0.087059069 |
| Slirp                | ENSMUSG00000021040                      | -0.582437716 | 0.002820554 | 0.087059069 |
| Zfp273               | ENSMUSG00000030446                      | -0.682021891 | 0.002836707 | 0.087059069 |
| Aldh18a1             | ENSMUSG00000025007                      | 0.405758385  | 0.002842282 | 0.087059069 |
| Uqcrcq               | ENSMUSG00000044894                      | -0.414690419 | 0.002845126 | 0.087059069 |
| Hddc2                | ENSMUSG00000000295                      | -0.507650428 | 0.00285291  | 0.087059069 |
| Gm44958+Magohb       | ENSMUSG00000030188+ENSMUSG000000107658  | -0.614900966 | 0.002860587 | 0.087059069 |
| Pde4d                | ENSMUSG00000021699                      | 0.27465523   | 0.002870918 | 0.087059069 |
| Pigx                 | ENSMUSG00000023791                      | -0.402832577 | 0.002876429 | 0.087059069 |
| Pma3                 | ENSMUSG00000060073                      | -0.507924068 | 0.002876562 | 0.087059069 |
| Tma7                 | ENSMUSG00000091537                      | -0.483440272 | 0.002883265 | 0.087059069 |
| Hspe1                | ENSMUSG00000073676                      | -0.458795883 | 0.002885453 | 0.087059069 |
| Resp18               | ENSMUSG00000033061                      | -0.269168298 | 0.002902017 | 0.087059069 |
| Paip2                | ENSMUSG00000037058                      | -0.39132026  | 0.00291669  | 0.087059069 |
| Cep63                | ENSMUSG00000032534                      | -0.256104182 | 0.002923016 | 0.087059069 |
| Mrpl22               | ENSMUSG00000020514                      | -0.335903355 | 0.00293128  | 0.087059069 |
| Tnfrsf1a             | ENSMUSG00000030341                      | 0.323270635  | 0.002931408 | 0.087059069 |
| Cbr4                 | ENSMUSG00000031641                      | -0.45483905  | 0.002940427 | 0.087059069 |
| Bend4                | ENSMUSG00000092060                      | 0.525100298  | 0.002940828 | 0.087059069 |
| Prorsd1              | ENSMUSG00000032673                      | -0.550900042 | 0.002948108 | 0.087059069 |
| Snord42b+Rpl23a      | ENSMUSG00000058546+ENSMUSG00000065676   | -0.524828023 | 0.002948263 | 0.087059069 |
| Smtn                 | ENSMUSG00000020439                      | 0.579354367  | 0.002948753 | 0.087059069 |
| Sub1                 | ENSMUSG00000022205                      | -0.472708384 | 0.002951414 | 0.087059069 |
| Sep-15               | ENSMUSG00000037072                      | -0.510769971 | 0.002953145 | 0.087059069 |
| Ncoa1                | ENSMUSG00000020647                      | 0.354736552  | 0.00296657  | 0.087059069 |
| Trhr                 | ENSMUSG00000038760                      | -0.370133716 | 0.002966722 | 0.087059069 |
| Doc2b                | ENSMUSG00000020848                      | 0.369502814  | 0.002969983 | 0.087059069 |
| Polb                 | ENSMUSG00000031536                      | -0.434782288 | 0.002975329 | 0.087059069 |



|                   |                                         |              |             |             |
|-------------------|-----------------------------------------|--------------|-------------|-------------|
| Guk1              | ENSMUSG00000020444                      | -0.360233004 | 0.002977425 | 0.087059069 |
| Psmc6             | ENSMUSG00000021737                      | -0.270469249 | 0.00297904  | 0.087059069 |
| Ndufc1            | ENSMUSG00000037152                      | -0.539102626 | 0.002989122 | 0.087059069 |
| Eif1a             | ENSMUSG00000057561                      | -0.362180889 | 0.002990254 | 0.087059069 |
| Mpc1-ps           | ENSMUSG00000091498                      | -0.55778785  | 0.002996309 | 0.087059069 |
| Zfp788            | ENSMUSG00000074165                      | -0.322948643 | 0.003006398 | 0.087059069 |
| Gm27734+Ntan1     | ENSMUSG00000022681+ENSMUSG00000099314   | -0.461098145 | 0.003009739 | 0.087059069 |
| C1d               | ENSMUSG00000000581                      | -0.591197662 | 0.003011365 | 0.087059069 |
| Tyropb            | ENSMUSG00000030579                      | -0.533112966 | 0.003021465 | 0.087059069 |
| Myo10             | ENSMUSG00000022272                      | 0.591998207  | 0.003028471 | 0.087059069 |
| Dnajc24           | ENSMUSG00000027166                      | -0.505875672 | 0.003042932 | 0.087059069 |
| Calm2             | ENSMUSG00000036438                      | -0.439849349 | 0.003044871 | 0.087059069 |
| Slmo2             | ENSMUSG00000016257                      | -0.321851991 | 0.003057321 | 0.087059069 |
| Rps19             | ENSMUSG00000040952                      | -0.47050524  | 0.003058272 | 0.087059069 |
| Ndufb3            | ENSMUSG00000026032                      | -0.47408692  | 0.003062041 | 0.087059069 |
| Scoc              | ENSMUSG00000063253                      | -0.355552028 | 0.003068898 | 0.087059069 |
| Cript             | ENSMUSG00000024146                      | -0.461290312 | 0.003082054 | 0.087059069 |
| Rab29             | ENSMUSG00000026433                      | -0.437325861 | 0.003084372 | 0.087059069 |
| Ube2e1            | ENSMUSG00000021774                      | -0.437721911 | 0.003085294 | 0.087059069 |
| Atp5e             | ENSMUSG00000016252                      | -0.526797678 | 0.003090102 | 0.087059069 |
| Mrpl42            | ENSMUSG00000062981                      | -0.492045309 | 0.003113822 | 0.087059069 |
| Acbd5             | ENSMUSG00000026781                      | -0.342407388 | 0.003119675 | 0.087059069 |
| Fam96a            | ENSMUSG00000032381                      | -0.386036882 | 0.003127656 | 0.087059069 |
| Rps3a1            | ENSMUSG00000028081                      | -0.498212921 | 0.003142964 | 0.087059069 |
| Rabac1            | ENSMUSG00000003380                      | -0.303773883 | 0.003143936 | 0.087059069 |
| Lamtor5           | ENSMUSG00000087260                      | -0.4705693   | 0.003145364 | 0.087059069 |
| Syde1             | ENSMUSG00000032714                      | 0.257448315  | 0.003148306 | 0.087059069 |
| Tstd3             | ENSMUSG00000028251                      | -0.457027153 | 0.003156218 | 0.087059069 |
| Bloc1s1+Rdh5      | ENSMUSG00000090247+ENSMUSG00000025350   | -0.488310218 | 0.003165745 | 0.087059069 |
| Fabp3             | ENSMUSG00000028773                      | -0.353828601 | 0.003186981 | 0.087059069 |
| Ift74             | ENSMUSG00000028576                      | -0.368443216 | 0.003200513 | 0.087059069 |
| Mir1892+Sptssa    | ENSMUSG00000106344+ENSMUSG00000044408   | -0.564879018 | 0.003205111 | 0.087059069 |
| Ndufv3            | ENSMUSG00000024038                      | -0.297774986 | 0.003217475 | 0.087059069 |
| BC002059          | ENSMUSG00000060149                      | -0.434040619 | 0.003229689 | 0.087059069 |
| Arsk              | ENSMUSG00000021592                      | -0.294693697 | 0.003237229 | 0.087059069 |
| Ankrd49           | ENSMUSG00000031931                      | -0.479080905 | 0.00324937  | 0.087059069 |
| Nme1+Gm20390+Nme2 | ENSMUSG00000091228+ENSMUSG00000020857+E | -0.390532276 | 0.003251553 | 0.087059069 |
| 1810022K09Rik     | ENSMUSG00000078784                      | -0.469721126 | 0.003253302 | 0.087059069 |
| Gjb6              | ENSMUSG00000040055                      | -0.242459963 | 0.003256525 | 0.087059069 |
| Nts               | ENSMUSG00000019890                      | -0.505786979 | 0.003268137 | 0.087059069 |
| Atp5l             | ENSMUSG00000038717                      | -0.538672595 | 0.003269096 | 0.087059069 |
| Pole              | ENSMUSG00000007080                      | 0.543315386  | 0.003272498 | 0.087059069 |
| Cenpo             | ENSMUSG00000020652                      | 0.444079417  | 0.003300783 | 0.087059069 |
| Snrpd2            | ENSMUSG00000040824                      | -0.434160399 | 0.003304143 | 0.087059069 |
| Iqgap1            | ENSMUSG00000030536                      | 0.42521842   | 0.003306166 | 0.087059069 |
| Sh3pxd2a          | ENSMUSG00000053617                      | 0.453951448  | 0.003310447 | 0.087059069 |
| Dusp12            | ENSMUSG00000026659                      | -0.2596112   | 0.00331748  | 0.087059069 |
| Ankra2            | ENSMUSG00000021661                      | -0.340334032 | 0.003317719 | 0.087059069 |
| Cdh5              | ENSMUSG00000031871                      | 0.64122343   | 0.00331845  | 0.087059069 |
| Ppia              | ENSMUSG00000071866                      | -0.40415745  | 0.003324675 | 0.087059069 |
| S100b             | ENSMUSG00000033208                      | -0.386822804 | 0.003335139 | 0.087059069 |
| mt-Co1            | ENSMUSG00000064351                      | -0.378394151 | 0.003359724 | 0.087059069 |
| Ndufa6            | ENSMUSG00000022450                      | -0.502142731 | 0.003365363 | 0.087059069 |
| Snord21+Rpl5      | ENSMUSG00000064453+ENSMUSG00000058558   | -0.421486562 | 0.003374398 | 0.087059069 |
| Rps5              | ENSMUSG00000012848                      | -0.541484138 | 0.00337876  | 0.087059069 |
| Lama4             | ENSMUSG00000019846                      | 0.55184051   | 0.003399142 | 0.087059069 |
| Ndufab1           | ENSMUSG00000030869                      | -0.211698284 | 0.003399674 | 0.087059069 |
| Smardc1           | ENSMUSG00000029920                      | -0.312094763 | 0.003404378 | 0.087059069 |
| Uba3              | ENSMUSG00000030061                      | -0.383595513 | 0.003406026 | 0.087059069 |

|                       |                                         |              |             |             |
|-----------------------|-----------------------------------------|--------------|-------------|-------------|
| C330018D20Rik         | ENSMUSG00000024592                      | -0.507901575 | 0.00342423  | 0.087059069 |
| Ndufa12               | ENSMUSG00000020022                      | -0.448405724 | 0.003426647 | 0.087059069 |
| Snrpb2                | ENSMUSG00000008333                      | -0.494297356 | 0.00343616  | 0.087059069 |
| mt-Nd4+mt-Nd4l        | ENSMUSG00000065947+ENSMUSG00000064363   | -0.387704351 | 0.003451799 | 0.087059069 |
| Ttc32                 | ENSMUSG00000066637                      | -0.627754879 | 0.003454515 | 0.087059069 |
| Uqcrh                 | ENSMUSG00000063882                      | -0.508178237 | 0.003456999 | 0.087059069 |
| Srp9                  | ENSMUSG00000026511                      | -0.506160225 | 0.003459253 | 0.087059069 |
| 1700066M21Rik         | ENSMUSG00000038323                      | -0.445971059 | 0.003461266 | 0.087059069 |
| Vps35                 | ENSMUSG00000031696                      | -0.368133835 | 0.003462383 | 0.087059069 |
| Scamp2                | ENSMUSG00000040188                      | 0.266086418  | 0.003468344 | 0.087059069 |
| Tspan2                | ENSMUSG00000027858                      | -0.263695519 | 0.003475614 | 0.087059069 |
| Lyrn5                 | ENSMUSG00000040370                      | -0.466586604 | 0.003480293 | 0.087059069 |
| Ndufs8                | ENSMUSG00000059734                      | -0.338404424 | 0.003480572 | 0.087059069 |
| Cystm1                | ENSMUSG00000046727                      | -0.299588006 | 0.003482883 | 0.087059069 |
| Znrd1as               | ENSMUSG00000036214                      | -0.479712902 | 0.003485613 | 0.087059069 |
| Ddit3                 | ENSMUSG00000025408                      | -0.300013532 | 0.003485844 | 0.087059069 |
| BC031181              | ENSMUSG00000036299                      | -0.268485664 | 0.003487012 | 0.087059069 |
| Slc38a3               | ENSMUSG00000010064                      | 0.367336436  | 0.003491597 | 0.087059069 |
| Clec5a                | ENSMUSG00000029915                      | -0.645329048 | 0.003514798 | 0.087059695 |
| Sdk1                  | ENSMUSG00000039683                      | 0.748926211  | 0.003540506 | 0.087059695 |
| Emc2                  | ENSMUSG00000022337                      | -0.473466722 | 0.003541875 | 0.087059695 |
| 2410015M20Rik         | ENSMUSG00000049760                      | -0.544233635 | 0.003545668 | 0.087059695 |
| Edil3                 | ENSMUSG00000034488                      | -0.468204515 | 0.003553727 | 0.087059695 |
| Smim4                 | ENSMUSG00000058351                      | -0.495634501 | 0.00356159  | 0.087059695 |
| Amotl1                | ENSMUSG00000013076                      | 0.428276131  | 0.00357081  | 0.087059695 |
| Rps14                 | ENSMUSG00000024608                      | -0.554071143 | 0.003575435 | 0.087059695 |
| Nbas                  | ENSMUSG00000020576                      | 0.402041026  | 0.003585033 | 0.087059695 |
| Lsr                   | ENSMUSG00000001247                      | 0.460702905  | 0.003585505 | 0.087059695 |
| Bbip1                 | ENSMUSG00000084957                      | -0.540078539 | 0.003600561 | 0.087059695 |
| Actr6                 | ENSMUSG00000019948                      | -0.578274583 | 0.003603373 | 0.087059695 |
| Bcl2a1b+Mthfs+Gm29094 | ENSMUSG00000100838+ENSMUSG00000066442+E | -0.497550652 | 0.00360361  | 0.087059695 |
| Ccdc122               | ENSMUSG00000034795                      | -0.635747312 | 0.003603716 | 0.087059695 |
| Ppp1r14a              | ENSMUSG00000037166                      | -0.326823514 | 0.003631539 | 0.087059695 |
| Zscan21               | ENSMUSG00000037017                      | 0.252877034  | 0.003641988 | 0.087059695 |
| Srp14                 | ENSMUSG00000009549                      | -0.429815869 | 0.003644043 | 0.087059695 |
| Adcy9                 | ENSMUSG00000005580                      | 0.557897207  | 0.003646799 | 0.087059695 |
| Psmc6                 | ENSMUSG00000021832                      | -0.496295373 | 0.003660738 | 0.087059695 |
| Atp5j                 | ENSMUSG00000022890                      | -0.457678537 | 0.003661004 | 0.087059695 |
| Mob4                  | ENSMUSG00000025979                      | -0.478344146 | 0.003661369 | 0.087059695 |
| Fam134b               | ENSMUSG00000022270                      | -0.286051277 | 0.003671887 | 0.087059695 |
| Nek7                  | ENSMUSG00000026393                      | -0.450092992 | 0.00367226  | 0.087059695 |
| Fstl4                 | ENSMUSG00000036264                      | 0.640223285  | 0.003673394 | 0.087059695 |
| Mff                   | ENSMUSG00000026150                      | -0.306993646 | 0.003674426 | 0.087059695 |
| Mir207+Dnaja1         | ENSMUSG00000065452+ENSMUSG00000028410   | -0.259958014 | 0.003679188 | 0.087059695 |
| Did                   | ENSMUSG00000020664                      | -0.319138404 | 0.003695232 | 0.08726821  |
| Naa38                 | ENSMUSG00000059278                      | -0.509226838 | 0.003706361 | 0.087360086 |
| Nae1                  | ENSMUSG00000031878                      | -0.329306551 | 0.003735436 | 0.087615839 |
| Deb1                  | ENSMUSG00000032526                      | -0.475305696 | 0.003737765 | 0.087615839 |
| Naca                  | ENSMUSG00000061315                      | -0.410749815 | 0.003740473 | 0.087615839 |
| Fastkd2               | ENSMUSG00000025962                      | -0.2867882   | 0.003748931 | 0.087615839 |
| Lpar6                 | ENSMUSG00000033446                      | -0.411746525 | 0.003773586 | 0.087615839 |
| Nmd3                  | ENSMUSG00000027787                      | -0.355447802 | 0.003778427 | 0.087615839 |
| Pcp4+Igsf5            | ENSMUSG00000090223+ENSMUSG00000000159   | -0.406239461 | 0.003780063 | 0.087615839 |
| Zfp950                | ENSMUSG00000074733                      | -0.392036835 | 0.003783964 | 0.087615839 |
| Rpl7                  | ENSMUSG00000043716                      | -0.44956007  | 0.003801171 | 0.087615839 |
| Smad3                 | ENSMUSG00000032402                      | 0.460533809  | 0.003802024 | 0.087615839 |
| Txn1                  | ENSMUSG00000028367                      | -0.344074983 | 0.003807893 | 0.087615839 |
| Ube2b                 | ENSMUSG00000020390                      | -0.38815297  | 0.003813685 | 0.087615839 |
| Rpsa                  | ENSMUSG00000032518                      | -0.411342484 | 0.003829094 | 0.087615839 |

|                        |                                         |              |             |             |
|------------------------|-----------------------------------------|--------------|-------------|-------------|
| Smim8                  | ENSMUSG00000028295                      | -0.482671811 | 0.003829514 | 0.087615839 |
| Pcnp                   | ENSMUSG00000071533                      | -0.370395267 | 0.003857465 | 0.087615839 |
| Rap1a                  | ENSMUSG00000068798                      | -0.505797541 | 0.003862788 | 0.087615839 |
| Mir7014+Ecm1           | ENSMUSG00000028108+ENSMUSG00000098737   | 0.47564208   | 0.00388787  | 0.087615839 |
| Thsd4                  | ENSMUSG00000032289                      | 0.627684972  | 0.00389167  | 0.087615839 |
| Zfp503                 | ENSMUSG00000039081                      | 0.487277493  | 0.003894219 | 0.087615839 |
| Lrfn1                  | ENSMUSG00000030600                      | 0.381050823  | 0.003894389 | 0.087615839 |
| Tuft1                  | ENSMUSG00000005968                      | 0.339836606  | 0.003909021 | 0.087615839 |
| Pole4                  | ENSMUSG00000030042                      | -0.42995419  | 0.003910139 | 0.087615839 |
| Tmem126b               | ENSMUSG00000030614                      | -0.425401577 | 0.003917284 | 0.087615839 |
| Mphosph8               | ENSMUSG00000079184                      | -0.18676145  | 0.003918496 | 0.087615839 |
| Polr2g                 | ENSMUSG00000071662                      | -0.258644397 | 0.003932104 | 0.087615839 |
| Cyp2j12                | ENSMUSG00000081225                      | -0.446936634 | 0.003945718 | 0.087615839 |
| Aph1b                  | ENSMUSG00000032375                      | -0.245122067 | 0.003953683 | 0.087615839 |
| Pdcd10                 | ENSMUSG00000027835                      | -0.517438695 | 0.003954772 | 0.087615839 |
| Tceb1                  | ENSMUSG00000079658                      | -0.502955181 | 0.003955799 | 0.087615839 |
| Tomm5                  | ENSMUSG00000078713                      | -0.562334802 | 0.003961328 | 0.087615839 |
| Itgb1bp1               | ENSMUSG00000062352                      | -0.263794219 | 0.003961654 | 0.087615839 |
| Greb1l                 | ENSMUSG00000042942                      | 0.42114679   | 0.00396575  | 0.087615839 |
| S100a13                | ENSMUSG00000042312                      | -0.516830906 | 0.003967989 | 0.087615839 |
| Fkbp3                  | ENSMUSG00000020949                      | -0.474232203 | 0.00397085  | 0.087615839 |
| Adck2+Ndufb2+Gm42420   | ENSMUSG00000107071+ENSMUSG00000002416+E | -0.414635054 | 0.003974644 | 0.087615839 |
| Romo1                  | ENSMUSG00000067847                      | -0.497956723 | 0.003982241 | 0.087615839 |
| Dnajc13                | ENSMUSG00000032560                      | 0.253746115  | 0.003985838 | 0.087615839 |
| Cept1                  | ENSMUSG00000040774                      | -0.324099433 | 0.003998428 | 0.08770296  |
| Adamts1                | ENSMUSG00000022893                      | 0.46172751   | 0.004004336 | 0.08770296  |
| mt-Cytb                | ENSMUSG00000064370                      | -0.378398197 | 0.004013294 | 0.087739912 |
| Gm14325                | ENSMUSG00000095362                      | -0.598698711 | 0.004025205 | 0.087806812 |
| Snx10                  | ENSMUSG00000038301                      | -0.307278893 | 0.004045547 | 0.087806812 |
| 2610316D01Rik          | ENSMUSG00000097040                      | -0.39861096  | 0.004049525 | 0.087806812 |
| Glrx3                  | ENSMUSG00000031068                      | -0.403601717 | 0.004061255 | 0.087806812 |
| Psenen                 | ENSMUSG00000036835                      | -0.301629312 | 0.004063248 | 0.087806812 |
| Sumo1                  | ENSMUSG00000026021                      | -0.536482144 | 0.004066878 | 0.087806812 |
| Mrps21                 | ENSMUSG00000054312                      | -0.380516028 | 0.004074446 | 0.087806812 |
| Heatr5b                | ENSMUSG00000039414                      | 0.451961541  | 0.004083093 | 0.087806812 |
| Commd8                 | ENSMUSG00000029213                      | -0.396952937 | 0.004105936 | 0.087806812 |
| A830082K12Rik          | ENSMUSG00000087143                      | -0.366104526 | 0.004115596 | 0.087806812 |
| Wwc2                   | ENSMUSG00000031563                      | 0.211300926  | 0.004121222 | 0.087806812 |
| Gm15421+Orc5           | ENSMUSG00000029012+ENSMUSG00000084235   | -0.255473995 | 0.004131791 | 0.087806812 |
| Ccdc53                 | ENSMUSG00000020056                      | -0.429415238 | 0.004138654 | 0.087806812 |
| Plcb3                  | ENSMUSG00000024960                      | 0.603530856  | 0.004140243 | 0.087806812 |
| 2310009A05Rik          | ENSMUSG00000098332                      | -0.546707687 | 0.004142145 | 0.087806812 |
| Zfp131                 | ENSMUSG00000094870                      | -0.391652687 | 0.004144338 | 0.087806812 |
| Etfa                   | ENSMUSG00000032314                      | -0.242108589 | 0.004148456 | 0.087806812 |
| Qdpr                   | ENSMUSG00000015806                      | -0.294853187 | 0.004151319 | 0.087806812 |
| Lamb1                  | ENSMUSG00000002900                      | 0.652129018  | 0.004156998 | 0.087806812 |
| Cetn4                  | ENSMUSG00000045031                      | -0.442914113 | 0.00416212  | 0.087806812 |
| Nmu                    | ENSMUSG000000029236                     | -0.548321929 | 0.00416915  | 0.087806812 |
| Kbtbd7                 | ENSMUSG00000043881                      | -0.375659633 | 0.004181993 | 0.087923849 |
| Gm37988+Lypla1+Tcea1   | ENSMUSG00000033813+ENSMUSG00000025903+E | -0.460382458 | 0.004193435 | 0.088011093 |
| E2f5                   | ENSMUSG00000027552                      | -0.44301304  | 0.004215971 | 0.088277384 |
| Pigp+Gm15310           | ENSMUSG00000022940+ENSMUSG00000089814   | -0.494836083 | 0.004221285 | 0.088277384 |
| Zfand6                 | ENSMUSG00000030629                      | -0.420172926 | 0.004238589 | 0.088277384 |
| Znhit3                 | ENSMUSG00000020526                      | -0.514152174 | 0.004240685 | 0.088277384 |
| Rps18                  | ENSMUSG00000008668                      | -0.53478243  | 0.004242848 | 0.088277384 |
| Myo1c                  | ENSMUSG00000017774                      | 0.381236433  | 0.00425334  | 0.088277384 |
| Smim10l1+RP24-470M22.1 | ENSMUSG00000072704+ENSMUSG00000107838   | -0.365093778 | 0.004257328 | 0.088277384 |
| Haus2                  | ENSMUSG00000027285                      | -0.399440197 | 0.004284541 | 0.088521346 |
| Arntl                  | ENSMUSG00000055116                      | 0.350758392  | 0.004300402 | 0.088521346 |

|                          |                                                             |              |             |             |
|--------------------------|-------------------------------------------------------------|--------------|-------------|-------------|
| Fabp7                    | ENSMUSG00000019874                                          | -0.648645055 | 0.004309314 | 0.088521346 |
| Gnai3                    | ENSMUSG00000000001                                          | -0.231289625 | 0.004314699 | 0.088521346 |
| Rpl41                    | ENSMUSG000000093674                                         | -0.525968151 | 0.004340377 | 0.088521346 |
| Cstb                     | ENSMUSG000000005054                                         | -0.414645032 | 0.004343185 | 0.088521346 |
| Ndufb4                   | ENSMUSG000000022820                                         | -0.449440631 | 0.004344937 | 0.088521346 |
| Zfp455                   | ENSMUSG000000051037                                         | -0.571914224 | 0.004345845 | 0.088521346 |
| Eif4a3                   | ENSMUSG000000025580                                         | 0.344897409  | 0.004351294 | 0.088521346 |
| Ubqln4                   | ENSMUSG000000008604                                         | 0.165738985  | 0.00435881  | 0.088521346 |
| Ankrd34a                 | ENSMUSG000000049097                                         | 0.36147313   | 0.004368915 | 0.088521346 |
| Mrpl47                   | ENSMUSG000000037531                                         | -0.455779404 | 0.004378514 | 0.088521346 |
| Tmed2                    | ENSMUSG000000029390                                         | -0.284140068 | 0.004385769 | 0.088521346 |
| Nmi                      | ENSMUSG000000026946                                         | -0.445260067 | 0.004388063 | 0.088521346 |
| Vdac3                    | ENSMUSG000000008892                                         | -0.296010464 | 0.004390385 | 0.088521346 |
| Sfrp1                    | ENSMUSG000000031548                                         | 0.310216068  | 0.00439142  | 0.088521346 |
| Aif1                     | ENSMUSG000000024397                                         | -0.542345612 | 0.004393792 | 0.088521346 |
| Eva1a                    | ENSMUSG000000035104                                         | -0.43084619  | 0.004401779 | 0.08853444  |
| Eif5a2                   | ENSMUSG000000050192                                         | -0.428795866 | 0.004411123 | 0.08855194  |
| Rpl18a                   | ENSMUSG000000045128                                         | -0.492993031 | 0.004424995 | 0.08855194  |
| 1110008F13Rik            | ENSMUSG000000027637                                         | -0.293976544 | 0.004430672 | 0.08855194  |
| Sar1b                    | ENSMUSG000000020386                                         | -0.511931403 | 0.004473715 | 0.08855194  |
| Frem1                    | ENSMUSG000000059049                                         | 0.295069406  | 0.004482621 | 0.08855194  |
| Metrn                    | ENSMUSG00000002274                                          | -0.518204983 | 0.004483804 | 0.08855194  |
| 1110065P20Rik            | ENSMUSG000000078570                                         | -0.440790435 | 0.004498689 | 0.08855194  |
| Thns1                    | ENSMUSG000000048550                                         | -0.296013026 | 0.004499055 | 0.08855194  |
| Midn                     | ENSMUSG000000035621                                         | 0.492475809  | 0.004511824 | 0.08855194  |
| Mettl20                  | ENSMUSG000000039958                                         | -0.409125975 | 0.004522133 | 0.08855194  |
| Lamc3                    | ENSMUSG000000026840                                         | 0.634698605  | 0.004522187 | 0.08855194  |
| Gas7                     | ENSMUSG000000033066                                         | 0.304821342  | 0.004523122 | 0.08855194  |
| Uqcrb                    | ENSMUSG000000021520                                         | -0.494475831 | 0.004524065 | 0.08855194  |
| Pno1                     | ENSMUSG000000020116                                         | -0.413432281 | 0.004526015 | 0.08855194  |
| Mrpl54                   | ENSMUSG000000034932                                         | -0.432120382 | 0.004526018 | 0.08855194  |
| Tmsb15b2+Tmsb15l+Tmsb15i | ENSMUSG000000072955+ENSMUSG000000089768+ENSMUSG00000009204  | -0.590917886 | 0.004527063 | 0.08855194  |
| Gm25091+Gm23202+Rpl21    | ENSMUSG000000077185+ENSMUSG000000077564+ENSMUSG000000077564 | -0.497542936 | 0.004549857 | 0.08855194  |
| Ccdc90b                  | ENSMUSG000000030613                                         | -0.557205862 | 0.00455078  | 0.08855194  |
| Zfp933                   | ENSMUSG000000059423                                         | -0.384132915 | 0.00456021  | 0.08855194  |
| Ptbp1                    | ENSMUSG000000006498                                         | 0.29779899   | 0.004560248 | 0.08855194  |
| Tmem126a                 | ENSMUSG000000030615                                         | -0.463050816 | 0.004560413 | 0.08855194  |
| Eif3i                    | ENSMUSG000000028798                                         | -0.251311923 | 0.004569867 | 0.08855194  |
| Srsf7                    | ENSMUSG000000024097                                         | -0.273805509 | 0.004574292 | 0.08855194  |
| Gm32444                  | ENSMUSG000000102729                                         | -0.375740184 | 0.004605889 | 0.08855194  |
| Gm24016+Rps20            | ENSMUSG000000088351+ENSMUSG000000028234                     | -0.521211498 | 0.004618579 | 0.08855194  |
| Lmo1                     | ENSMUSG000000036111                                         | -0.411691343 | 0.004620156 | 0.08855194  |
| Calcl                    | ENSMUSG000000059588                                         | -0.502392538 | 0.004634904 | 0.08855194  |
| Pbxip1                   | ENSMUSG000000042613                                         | 0.23799186   | 0.004640277 | 0.08855194  |
| 1110034G24Rik            | ENSMUSG000000044991                                         | -0.33739133  | 0.004641141 | 0.08855194  |
| Gm27943+Glb1l            | ENSMUSG000000026200+ENSMUSG000000099204                     | 0.220457577  | 0.004658    | 0.08855194  |
| Tmem167                  | ENSMUSG000000012422                                         | -0.505804691 | 0.004662552 | 0.08855194  |
| Ptpre                    | ENSMUSG000000041836                                         | 0.287521057  | 0.004668597 | 0.08855194  |
| Rps28                    | ENSMUSG000000067288                                         | -0.362980213 | 0.004668683 | 0.08855194  |
| Rpl37rt                  | ENSMUSG000000072692                                         | -0.655855524 | 0.004670943 | 0.08855194  |
| Cd53                     | ENSMUSG000000040747                                         | -0.645897288 | 0.004676029 | 0.08855194  |
| Rapgef2                  | ENSMUSG000000062232                                         | 0.393007955  | 0.004678168 | 0.08855194  |
| Rpa3                     | ENSMUSG000000012483                                         | -0.500638419 | 0.004684554 | 0.08855194  |
| Nudt4                    | ENSMUSG000000020029                                         | -0.229986523 | 0.004689094 | 0.08855194  |
| Lyrn4                    | ENSMUSG000000046573                                         | -0.408743068 | 0.004703265 | 0.08855194  |
| Sf3b6                    | ENSMUSG000000037361                                         | -0.558300589 | 0.004705952 | 0.08855194  |
| Sep-07                   | ENSMUSG00000001833                                          | -0.426942306 | 0.004717678 | 0.08855194  |
| Fbxo10                   | ENSMUSG000000048232                                         | 0.384072181  | 0.004721741 | 0.08855194  |
| Nudt5                    | ENSMUSG000000025817                                         | -0.323824841 | 0.004723138 | 0.08855194  |

|               |                    |              |             |             |
|---------------|--------------------|--------------|-------------|-------------|
| Psma2         | ENSMUSG00000015671 | -0.455371417 | 0.00472551  | 0.08855194  |
| Kcnj6         | ENSMUSG00000043301 | 0.596870895  | 0.004746723 | 0.088806199 |
| Cetn3         | ENSMUSG00000021537 | -0.54456163  | 0.004767562 | 0.088806199 |
| Pdgfrb        | ENSMUSG00000024620 | 0.562836271  | 0.004776095 | 0.088806199 |
| Rps23         | ENSMUSG00000049517 | -0.506417257 | 0.004781465 | 0.088806199 |
| H2afz         | ENSMUSG00000037894 | -0.439942624 | 0.004785615 | 0.088806199 |
| Stx8          | ENSMUSG00000020903 | -0.272836127 | 0.004793827 | 0.088806199 |
| Ube2v2        | ENSMUSG00000022674 | -0.545697158 | 0.004801541 | 0.088806199 |
| Cops2         | ENSMUSG00000027206 | -0.543964734 | 0.004804052 | 0.088806199 |
| Tceb2         | ENSMUSG00000055839 | -0.394865423 | 0.004805606 | 0.088806199 |
| Rps21         | ENSMUSG00000039001 | -0.532034496 | 0.004817141 | 0.088806199 |
| Spats2l       | ENSMUSG00000038305 | 0.266237654  | 0.00483264  | 0.088806199 |
| Mgst3         | ENSMUSG00000026688 | -0.302019015 | 0.004841041 | 0.088806199 |
| 2700094K13Rik | ENSMUSG00000076437 | -0.393377181 | 0.004841908 | 0.088806199 |
| Rpl37         | ENSMUSG00000041841 | -0.491646794 | 0.004848347 | 0.088806199 |
| Rrp12         | ENSMUSG00000035049 | 0.525894852  | 0.00484946  | 0.088806199 |
| Otud6b        | ENSMUSG00000040550 | -0.396251488 | 0.004868884 | 0.089026804 |
| Mocs2         | ENSMUSG00000015536 | -0.345125548 | 0.004883022 | 0.089041592 |
| Pomp          | ENSMUSG00000029649 | -0.382693986 | 0.004884449 | 0.089041592 |
| Nostrin       | ENSMUSG00000034738 | -0.50119104  | 0.004959771 | 0.090144607 |
| Myh10         | ENSMUSG00000020900 | 0.574144962  | 0.004959895 | 0.090144607 |
| Nudcd1        | ENSMUSG00000038736 | -0.303169094 | 0.004980661 | 0.090243179 |
| Ilf3          | ENSMUSG00000032178 | 0.253461174  | 0.004985359 | 0.090243179 |
| Klhl2         | ENSMUSG00000031605 | -0.204312711 | 0.004987753 | 0.090243179 |
| Cnot1         | ENSMUSG00000036550 | 0.341969954  | 0.005022429 | 0.090479281 |
| Ociad2        | ENSMUSG00000029153 | -0.261890823 | 0.005026795 | 0.090479281 |
| Cdc42bpg      | ENSMUSG00000024769 | 0.448698992  | 0.005028581 | 0.090479281 |
| Etv6          | ENSMUSG00000030199 | 0.403536151  | 0.005030792 | 0.090479281 |
| Nudt19        | ENSMUSG00000034875 | -0.402015463 | 0.005053424 | 0.090496185 |
| Fat4          | ENSMUSG00000046743 | 0.582958552  | 0.005057579 | 0.090496185 |
| Zfp931        | ENSMUSG00000078861 | -0.629544009 | 0.005062796 | 0.090496185 |
| Ccnc          | ENSMUSG00000028252 | -0.464725112 | 0.005068462 | 0.090496185 |
| Zkscan17      | ENSMUSG00000020472 | 0.333664389  | 0.005074453 | 0.090496185 |
| Hltf          | ENSMUSG00000002428 | -0.245219366 | 0.005076725 | 0.090496185 |
| 4930522L14Rik | ENSMUSG00000072762 | -0.628685923 | 0.005095164 | 0.090690908 |
| Hdac2         | ENSMUSG00000019777 | -0.205026404 | 0.00510412  | 0.090716527 |
| Aamdc         | ENSMUSG00000035642 | -0.497484702 | 0.00512081  | 0.090733492 |
| Rarg          | ENSMUSG00000001288 | 0.388484201  | 0.005124292 | 0.090733492 |
| Btf3l4        | ENSMUSG00000028568 | -0.347600757 | 0.00512763  | 0.090733492 |
| Oprd1         | ENSMUSG00000050511 | 0.463036857  | 0.005146654 | 0.090911486 |
| Fbxl3         | ENSMUSG00000022124 | -0.410472302 | 0.005152756 | 0.090911486 |
| Tenm2         | ENSMUSG00000049336 | 0.624189357  | 0.005164612 | 0.090952056 |
| Lymr2         | ENSMUSG00000045854 | -0.458982049 | 0.005178279 | 0.090952056 |
| Hint1         | ENSMUSG00000020267 | -0.414517966 | 0.005183244 | 0.090952056 |
| Tm2d1         | ENSMUSG00000028563 | -0.524647399 | 0.005192299 | 0.090952056 |
| Ephb2         | ENSMUSG00000028664 | 0.613180462  | 0.005202672 | 0.090952056 |
| Nectin2       | ENSMUSG00000062300 | 0.377193048  | 0.005207581 | 0.090952056 |
| Srp19         | ENSMUSG00000014504 | -0.451555619 | 0.005221111 | 0.090952056 |
| Itgb3bp       | ENSMUSG00000028549 | -0.555688072 | 0.005224579 | 0.090952056 |
| Crbn          | ENSMUSG00000005362 | -0.410130423 | 0.005224655 | 0.090952056 |
| Hexdc         | ENSMUSG00000039307 | 0.238140778  | 0.005230422 | 0.090952056 |
| Grpel1        | ENSMUSG00000029198 | -0.268368022 | 0.005261002 | 0.091323104 |
| Mtrf1l        | ENSMUSG00000019774 | -0.293229132 | 0.0052751   | 0.091323104 |
| Mttp          | ENSMUSG00000028158 | 0.216227139  | 0.005299371 | 0.091323104 |
| Thoc7         | ENSMUSG00000053453 | -0.410496185 | 0.005299483 | 0.091323104 |
| Esd           | ENSMUSG00000021996 | -0.291056138 | 0.005300606 | 0.091323104 |
| Dusp28        | ENSMUSG00000047067 | -0.411643284 | 0.005302903 | 0.091323104 |
| Ptcd1         | ENSMUSG00000029624 | 0.36916688   | 0.005304731 | 0.091323104 |
| Vps26b        | ENSMUSG00000031988 | 0.23403852   | 0.005329285 | 0.091615123 |

|                         |                                         |              |             |             |
|-------------------------|-----------------------------------------|--------------|-------------|-------------|
| Myl6                    | ENSMUSG00000090841                      | -0.428833989 | 0.005343198 | 0.091692633 |
| Taf1a                   | ENSMUSG00000072258                      | 0.263834815  | 0.005353866 | 0.091692633 |
| Fxr1                    | ENSMUSG00000027680                      | -0.265277586 | 0.005356734 | 0.091692633 |
| Tmem69                  | ENSMUSG00000055900                      | -0.34219413  | 0.005364186 | 0.091692633 |
| Ncan                    | ENSMUSG00000002341                      | 0.513025131  | 0.005379474 | 0.091698198 |
| Ptprb                   | ENSMUSG00000020154                      | 0.403722981  | 0.005392191 | 0.091698198 |
| Dmp1                    | ENSMUSG00000029307                      | 0.511151147  | 0.005405656 | 0.091698198 |
| Atp6v1g1                | ENSMUSG00000039105                      | -0.288559395 | 0.005411925 | 0.091698198 |
| Axin1                   | ENSMUSG00000024182                      | 0.31631144   | 0.005427814 | 0.091698198 |
| Rpl29                   | ENSMUSG00000048758                      | -0.356163193 | 0.00543629  | 0.091698198 |
| Uggt1                   | ENSMUSG00000037470                      | 0.366169157  | 0.005447863 | 0.091698198 |
| Hnmt                    | ENSMUSG00000026986                      | -0.528988243 | 0.005456864 | 0.091698198 |
| Slc12a2                 | ENSMUSG00000024597                      | -0.323884293 | 0.005458586 | 0.091698198 |
| Gstm7                   | ENSMUSG00000004035                      | -0.270190635 | 0.005459689 | 0.091698198 |
| Slc39a12                | ENSMUSG00000036949                      | -0.219419671 | 0.005469144 | 0.091698198 |
| Rab43+Isy1+Gm45140      | ENSMUSG00000030056+ENSMUSG00000107928+E | 0.173823553  | 0.0054791   | 0.091698198 |
| Relt                    | ENSMUSG00000008318                      | 0.219417199  | 0.005490988 | 0.091698198 |
| 4933434E20Rik           | ENSMUSG00000027942                      | -0.366305289 | 0.005497777 | 0.091698198 |
| Syn3                    | ENSMUSG00000059602                      | 0.613330343  | 0.005505347 | 0.091698198 |
| Vip                     | ENSMUSG00000019772                      | -0.367956291 | 0.005508519 | 0.091698198 |
| Fchsd1                  | ENSMUSG00000038524                      | 0.278850883  | 0.005523471 | 0.091698198 |
| Ndufs6                  | ENSMUSG00000021606                      | -0.424073549 | 0.005523924 | 0.091698198 |
| Eef1e1                  | ENSMUSG00000001707                      | -0.525245129 | 0.005528974 | 0.091698198 |
| Esyt3                   | ENSMUSG00000037681                      | 0.510493938  | 0.00553965  | 0.091698198 |
| 3110082117Rik           | ENSMUSG00000053553                      | -0.348313577 | 0.005542058 | 0.091698198 |
| Csm1                    | ENSMUSG00000060924                      | 0.570657347  | 0.005548068 | 0.091698198 |
| Gm43848                 | ENSMUSG00000106317                      | -0.430461709 | 0.005549934 | 0.091698198 |
| Abhd17b                 | ENSMUSG00000047368                      | -0.324461145 | 0.005567421 | 0.091698198 |
| Rpl11                   | ENSMUSG00000059291                      | -0.48804384  | 0.005575454 | 0.091698198 |
| Fam19a1                 | ENSMUSG00000059187                      | -0.234582742 | 0.005595259 | 0.091698198 |
| Pcdhb17                 | ENSMUSG00000046387                      | 0.266152506  | 0.005598334 | 0.091698198 |
| Agpat5                  | ENSMUSG00000031467                      | -0.240356391 | 0.005600602 | 0.091698198 |
| Lamtor4                 | ENSMUSG00000050552                      | -0.477330235 | 0.005606887 | 0.091698198 |
| Rps15                   | ENSMUSG00000063457                      | -0.422471774 | 0.005616172 | 0.091698198 |
| Rida                    | ENSMUSG00000022323                      | -0.565433243 | 0.005617103 | 0.091698198 |
| Gm12057+Gm28048+Gm12057 | ENSMUSG00000098650+ENSMUSG00000051355+E | -0.394789278 | 0.005617138 | 0.091698198 |
| Gpm6a                   | ENSMUSG00000031517                      | -0.293500076 | 0.005628685 | 0.091698198 |
| Cbwd1                   | ENSMUSG00000024878                      | -0.463765875 | 0.005639964 | 0.091698198 |
| Slc8a2                  | ENSMUSG00000030376                      | 0.517531522  | 0.005653665 | 0.091698198 |
| Gm13341                 | ENSMUSG00000083863                      | -0.689974846 | 0.005654614 | 0.091698198 |
| Crem                    | ENSMUSG00000063889                      | -0.479732644 | 0.005670553 | 0.091698198 |
| Rheb                    | ENSMUSG00000028945                      | -0.330973378 | 0.005677208 | 0.091698198 |
| Cldnd1                  | ENSMUSG00000022744                      | -0.284576966 | 0.005686374 | 0.091698198 |
| Ly86                    | ENSMUSG00000021423                      | -0.51106286  | 0.005688938 | 0.091698198 |
| Mrpl18                  | ENSMUSG00000057388                      | -0.405880981 | 0.005689982 | 0.091698198 |
| Mzt1                    | ENSMUSG00000033186                      | -0.44622173  | 0.005694583 | 0.091698198 |
| Bnip3l                  | ENSMUSG00000022051                      | -0.312123123 | 0.005697069 | 0.091698198 |
| Bbox1                   | ENSMUSG00000041660                      | -0.378038216 | 0.005705509 | 0.091698198 |
| Cd52                    | ENSMUSG00000000682                      | -0.571521941 | 0.005706442 | 0.091698198 |
| Cbfa2t3                 | ENSMUSG00000006362                      | 0.537775406  | 0.005721851 | 0.09181769  |
| Rec8                    | ENSMUSG00000002324                      | 0.469112401  | 0.005729095 | 0.09181769  |
| Thada                   | ENSMUSG00000024251                      | 0.350358174  | 0.005744093 | 0.091935963 |
| Smyd3                   | ENSMUSG00000055067                      | 0.192340943  | 0.005760772 | 0.091942352 |
| Cnih4                   | ENSMUSG00000062169                      | -0.285437012 | 0.005766986 | 0.091942352 |
| Aebp1                   | ENSMUSG00000020473                      | 0.727522154  | 0.005769041 | 0.091942352 |
| Pdhh                    | ENSMUSG00000021748                      | -0.237499698 | 0.005774967 | 0.091942352 |
| Zfp677                  | ENSMUSG00000062743                      | -0.529780683 | 0.005798373 | 0.092193367 |
| Snord15b+Rps3           | ENSMUSG00000064966+ENSMUSG00000030744   | -0.46985973  | 0.005808013 | 0.09222514  |
| Mrpl24                  | ENSMUSG00000019710                      | -0.235874622 | 0.005836155 | 0.092429528 |

|                     |                                         |              |             |             |
|---------------------|-----------------------------------------|--------------|-------------|-------------|
| Ufsp2               | ENSMUSG00000031634                      | -0.205874686 | 0.005837772 | 0.092429528 |
| Zfp946              | ENSMUSG00000071266                      | -0.480218248 | 0.005850653 | 0.092429528 |
| Sec61b              | ENSMUSG00000053317                      | -0.432181888 | 0.005854423 | 0.092429528 |
| Akip1               | ENSMUSG00000031023                      | -0.320854355 | 0.00585918  | 0.092429528 |
| Tex10               | ENSMUSG00000028345                      | -0.216954453 | 0.005881518 | 0.092499493 |
| Tmem33              | ENSMUSG00000037720                      | -0.318301203 | 0.005886179 | 0.092499493 |
| E130311K13Rik       | ENSMUSG00000048581                      | -0.416618616 | 0.005896488 | 0.092499493 |
| Trmt10c             | ENSMUSG00000044763                      | -0.431513154 | 0.00589871  | 0.092499493 |
| Smc4                | ENSMUSG00000034349                      | -0.349475411 | 0.005917329 | 0.092499493 |
| Zfp518b             | ENSMUSG00000046572                      | 0.289514432  | 0.00592732  | 0.092499493 |
| Snrpe               | ENSMUSG00000090553                      | -0.558259673 | 0.005927327 | 0.092499493 |
| Zfp938              | ENSMUSG00000062931                      | -0.524362835 | 0.005931754 | 0.092499493 |
| Rpp30               | ENSMUSG00000024800                      | -0.431787812 | 0.005932599 | 0.092499493 |
| Prkrir              | ENSMUSG00000030753                      | -0.379819519 | 0.005954582 | 0.09272244  |
| Fcho2               | ENSMUSG00000041685                      | -0.455197299 | 0.005992946 | 0.092820295 |
| Rplp1               | ENSMUSG00000007892                      | -0.519257606 | 0.006001224 | 0.092820295 |
| Cops3               | ENSMUSG00000019373                      | -0.23147652  | 0.006001716 | 0.092820295 |
| Sft2d1+T2           | ENSMUSG00000058159+ENSMUSG00000073468   | -0.216997823 | 0.006006504 | 0.092820295 |
| Atf5                | ENSMUSG00000038539                      | -0.295963456 | 0.006015063 | 0.092820295 |
| Hcn4                | ENSMUSG00000032338                      | 0.647313916  | 0.006026643 | 0.092820295 |
| Prdm11              | ENSMUSG00000075028                      | 0.514764926  | 0.006029065 | 0.092820295 |
| Lmo7                | ENSMUSG00000033060                      | 0.283784826  | 0.006041231 | 0.092820295 |
| Glis2               | ENSMUSG00000014303                      | 0.412978375  | 0.006049863 | 0.092820295 |
| Mboat7              | ENSMUSG00000035596                      | 0.390458247  | 0.006053861 | 0.092820295 |
| Smdt1+Fam109b       | ENSMUSG00000049687+ENSMUSG00000022452   | -0.460824933 | 0.006076204 | 0.092820295 |
| Fam103a1            | ENSMUSG00000038646                      | -0.497312837 | 0.006083012 | 0.092820295 |
| Fbxo33              | ENSMUSG00000035329                      | -0.316094539 | 0.006083047 | 0.092820295 |
| Mkks                | ENSMUSG00000027274                      | -0.460966267 | 0.006087248 | 0.092820295 |
| Igf1r               | ENSMUSG00000005533                      | 0.626544643  | 0.006122977 | 0.092820295 |
| Dpy30               | ENSMUSG00000024067                      | -0.419339428 | 0.006131112 | 0.092820295 |
| Gng11               | ENSMUSG00000032766                      | -0.52016937  | 0.006131709 | 0.092820295 |
| Uqcr11              | ENSMUSG00000020163                      | -0.457028586 | 0.006138737 | 0.092820295 |
| Rpl23               | ENSMUSG00000071415                      | -0.453446153 | 0.006139228 | 0.092820295 |
| Rcbtb2              | ENSMUSG00000022106                      | -0.218235405 | 0.006142121 | 0.092820295 |
| Atp6v1f             | ENSMUSG00000004285                      | -0.340160814 | 0.006149141 | 0.092820295 |
| Kdm3b               | ENSMUSG00000038773                      | 0.322326815  | 0.006162135 | 0.092820295 |
| Atrn                | ENSMUSG00000027312                      | 0.390456639  | 0.006179342 | 0.092820295 |
| Fbxo8               | ENSMUSG00000038206                      | -0.319634677 | 0.006199567 | 0.092820295 |
| Pcna                | ENSMUSG00000027342                      | -0.32763098  | 0.006205655 | 0.092820295 |
| Tmem128             | ENSMUSG00000067365                      | -0.434288394 | 0.006207741 | 0.092820295 |
| Phf10               | ENSMUSG00000023883                      | -0.236880321 | 0.006218083 | 0.092820295 |
| Gm6377+Sh3bgrl      | ENSMUSG00000031246+ENSMUSG00000048621   | -0.513285823 | 0.006226094 | 0.092820295 |
| Uqcrfs1             | ENSMUSG00000038462                      | -0.223181918 | 0.006227883 | 0.092820295 |
| Gpr22               | ENSMUSG00000044067                      | -0.540189988 | 0.006229722 | 0.092820295 |
| Evi2a+Gm21975+Evi2b | ENSMUSG00000093938+ENSMUSG00000070354+E | -0.22578873  | 0.00623129  | 0.092820295 |
| Fn1                 | ENSMUSG00000026193                      | 1.177891357  | 0.006238507 | 0.092820295 |
| Cdc26               | ENSMUSG00000066149                      | -0.348156592 | 0.006246113 | 0.092820295 |
| Lmtk2               | ENSMUSG00000038970                      | 0.566489916  | 0.00625009  | 0.092820295 |
| Coq7                | ENSMUSG00000030652                      | -0.277663863 | 0.006250605 | 0.092820295 |
| Ccdc43              | ENSMUSG00000020925                      | -0.2749832   | 0.006251044 | 0.092820295 |
| Adh5                | ENSMUSG00000028138                      | -0.365435099 | 0.006251699 | 0.092820295 |
| Sptb                | ENSMUSG00000021061                      | 0.747331459  | 0.006253141 | 0.092820295 |
| Ano6                | ENSMUSG00000064210                      | 0.291629062  | 0.006267819 | 0.092923889 |
| Kcnb1               | ENSMUSG00000050556                      | 0.491759564  | 0.006277305 | 0.092950328 |
| Wdr5                | ENSMUSG00000026917                      | 0.240885577  | 0.006301531 | 0.093082543 |
| Ubl5                | ENSMUSG00000084786                      | -0.410832666 | 0.006305308 | 0.093082543 |
| Bcas1               | ENSMUSG00000013523                      | -0.324316305 | 0.006315182 | 0.093082543 |
| Dmtf1               | ENSMUSG00000042508                      | -0.21939365  | 0.006317087 | 0.093082543 |
| Pfdn5+Myg1          | ENSMUSG00000001289+ENSMUSG00000001285   | -0.455803476 | 0.006351725 | 0.093176191 |

|                       |                                         |              |             |             |
|-----------------------|-----------------------------------------|--------------|-------------|-------------|
| Lgals1                | ENSMUSG00000068220                      | -0.514129035 | 0.006361419 | 0.093176191 |
| Rbm7                  | ENSMUSG00000042396                      | -0.481100415 | 0.006362756 | 0.093176191 |
| Gm21987+Cox17+Popdc2  | ENSMUSG00000095464+ENSMUSG00000046516+E | -0.453791352 | 0.006374945 | 0.093176191 |
| Acot13                | ENSMUSG00000006717                      | -0.481943666 | 0.006382991 | 0.093176191 |
| Swt1                  | ENSMUSG00000052748                      | -0.372886022 | 0.006386988 | 0.093176191 |
| Ost4                  | ENSMUSG00000038803                      | -0.533532414 | 0.006387906 | 0.093176191 |
| Klf4                  | ENSMUSG00000003032                      | 0.671835828  | 0.00638816  | 0.093176191 |
| Igfbp5                | ENSMUSG00000026185                      | 0.414912708  | 0.006392931 | 0.093176191 |
| Ehbp1                 | ENSMUSG00000042302                      | 0.178862007  | 0.00641116  | 0.093329174 |
| Gm28041+Zfp953+Gm2804 | ENSMUSG00000098692+ENSMUSG00000078995+E | -0.463459928 | 0.006421536 | 0.093367584 |
| Dag1                  | ENSMUSG00000039952                      | 0.413848305  | 0.006435668 | 0.093440954 |
| Eftud2                | ENSMUSG00000020929                      | 0.308237107  | 0.006442068 | 0.093440954 |
| Scrg1                 | ENSMUSG00000031610                      | -0.547681169 | 0.006463028 | 0.093616503 |
| Spccs1                | ENSMUSG00000021917                      | -0.485944934 | 0.006473997 | 0.093616503 |
| Selt                  | ENSMUSG00000075700                      | -0.345695754 | 0.006485167 | 0.093616503 |
| Ublcp1                | ENSMUSG00000041231                      | -0.254644923 | 0.006496654 | 0.093616503 |
| Yaf2                  | ENSMUSG00000022634                      | -0.294898747 | 0.006510015 | 0.093616503 |
| 2500004C02Rik         | ENSMUSG00000073236                      | -0.385938649 | 0.006511156 | 0.093616503 |
| Nipa2                 | ENSMUSG00000030452                      | -0.274074901 | 0.006520186 | 0.093616503 |
| Decr1                 | ENSMUSG00000028223                      | -0.355861809 | 0.006527568 | 0.093616503 |
| Cycs                  | ENSMUSG00000063694                      | -0.467183745 | 0.00654995  | 0.093616503 |
| ltpa                  | ENSMUSG00000074797                      | -0.372215714 | 0.006558159 | 0.093616503 |
| Ndufa5                | ENSMUSG00000023089                      | -0.511802903 | 0.006559337 | 0.093616503 |
| Nt5c3                 | ENSMUSG00000029780                      | -0.45588795  | 0.006562854 | 0.093616503 |
| Acat1                 | ENSMUSG00000032047                      | -0.222539737 | 0.006566409 | 0.093616503 |
| Zfp811                | ENSMUSG00000055202                      | -0.332538114 | 0.006588229 | 0.093616503 |
| Rpl35                 | ENSMUSG00000062997                      | -0.485897796 | 0.006590291 | 0.093616503 |
| Fam136a               | ENSMUSG00000057497                      | -0.278684868 | 0.006592587 | 0.093616503 |
| Rpl26                 | ENSMUSG00000060938                      | -0.528984097 | 0.006600518 | 0.093616503 |
| Grin2b                | ENSMUSG00000030209                      | 0.619352983  | 0.006603826 | 0.093616503 |
| Rps24                 | ENSMUSG00000025290                      | -0.49248234  | 0.006612737 | 0.093616503 |
| Fabp5                 | ENSMUSG00000027533                      | -0.414691317 | 0.006630478 | 0.093616503 |
| Erich3                | ENSMUSG00000078161                      | 0.370041191  | 0.006634976 | 0.093616503 |
| Sarnp                 | ENSMUSG00000078427                      | -0.482171817 | 0.006638822 | 0.093616503 |
| Paf1                  | ENSMUSG00000003437                      | 0.323130243  | 0.006640123 | 0.093616503 |
| Rps12                 | ENSMUSG00000061983                      | -0.495082854 | 0.006647003 | 0.093616503 |
| 4833423E24Rik         | ENSMUSG00000075217                      | -0.39770999  | 0.006652481 | 0.093616503 |
| Gm17018               | ENSMUSG00000041035                      | -0.308355667 | 0.006659982 | 0.093616503 |
| Slc23a2               | ENSMUSG00000027340                      | 0.332304047  | 0.006663621 | 0.093616503 |
| Lyst                  | ENSMUSG00000019726                      | 0.399667801  | 0.006688025 | 0.093796763 |
| Adcy7                 | ENSMUSG00000031659                      | 0.453648337  | 0.006716471 | 0.093796763 |
| Sec22c                | ENSMUSG00000061536                      | 0.228006444  | 0.006716538 | 0.093796763 |
| Itga1                 | ENSMUSG00000042284                      | 0.355014535  | 0.00671722  | 0.093796763 |
| Plxnc1                | ENSMUSG00000074785                      | 0.269872872  | 0.006728434 | 0.093796763 |
| Pik3ap1               | ENSMUSG00000025017                      | 0.388677845  | 0.006730567 | 0.093796763 |
| Rpl34                 | ENSMUSG00000062006                      | -0.51397758  | 0.006730858 | 0.093796763 |
| Vangl2                | ENSMUSG00000026556                      | 0.404590095  | 0.006740609 | 0.0938243   |
| Fis1                  | ENSMUSG00000019054                      | -0.444617417 | 0.006752782 | 0.093885447 |
| Zfp426                | ENSMUSG00000059475                      | -0.194366649 | 0.006774409 | 0.093932153 |
| Mbnl2                 | ENSMUSG00000022139                      | -0.315815384 | 0.006779533 | 0.093932153 |
| Nudcd2                | ENSMUSG00000020328                      | -0.405567011 | 0.006781835 | 0.093932153 |
| Nus1                  | ENSMUSG00000023068                      | -0.326686263 | 0.006799768 | 0.093932153 |
| Ech1                  | ENSMUSG00000053898                      | -0.214339784 | 0.006801749 | 0.093932153 |
| Eif3e                 | ENSMUSG00000022336                      | -0.555228961 | 0.006809361 | 0.093932153 |
| Golga4                | ENSMUSG00000038708                      | 0.299150155  | 0.006811637 | 0.093932153 |
| Supt6                 | ENSMUSG00000002052                      | 0.459079094  | 0.006823283 | 0.093932153 |
| Rpl38                 | ENSMUSG00000057322                      | -0.497099405 | 0.006832304 | 0.093932153 |
| Trappc6a              | ENSMUSG00000002043                      | -0.327120905 | 0.006848196 | 0.093932153 |
| Irs1                  | ENSMUSG00000055980                      | 0.285930696  | 0.006858446 | 0.093932153 |



|                       |                                         |              |             |             |
|-----------------------|-----------------------------------------|--------------|-------------|-------------|
| Pttg1                 | ENSMUSG00000020415                      | -0.210261205 | 0.006859763 | 0.093932153 |
| Xrcc4                 | ENSMUSG00000021615                      | -0.484011143 | 0.006869416 | 0.093932153 |
| Eapp                  | ENSMUSG00000054302                      | -0.365541235 | 0.006874522 | 0.093932153 |
| Rwdd1                 | ENSMUSG00000019782                      | -0.410035627 | 0.006874902 | 0.093932153 |
| Plekhb1               | ENSMUSG00000030701                      | -0.261812938 | 0.006880678 | 0.093932153 |
| 4930570G19Rik         | ENSMUSG00000085084                      | -0.454259475 | 0.006903247 | 0.094133775 |
| Lrrc16a               | ENSMUSG00000021338                      | 0.285892072  | 0.006912356 | 0.094151599 |
| Efna5                 | ENSMUSG00000048915                      | 0.329778776  | 0.006943155 | 0.094303796 |
| Igsf9b                | ENSMUSG00000034275                      | 0.784192365  | 0.006944773 | 0.094303796 |
| Zfp758                | ENSMUSG00000044501                      | -0.540745946 | 0.006957974 | 0.094303796 |
| Psmb3                 | ENSMUSG00000069744                      | -0.429278318 | 0.006962339 | 0.094303796 |
| Btrc                  | ENSMUSG00000025217                      | 0.22359196   | 0.006974458 | 0.094303796 |
| Urm1                  | ENSMUSG00000069020                      | -0.307720287 | 0.006980173 | 0.094303796 |
| Slc50a1               | ENSMUSG00000027953                      | -0.169774467 | 0.006982829 | 0.094303796 |
| Sec31b+Ndufb8+Gm20538 | ENSMUSG00000091471+ENSMUSG00000025204+E | -0.354862507 | 0.007014026 | 0.094303796 |
| Slc2a5                | ENSMUSG00000028976                      | 0.400605502  | 0.00701633  | 0.094303796 |
| Npm1                  | ENSMUSG00000057113                      | -0.33528124  | 0.007024475 | 0.094303796 |
| Zfp709                | ENSMUSG00000056019                      | -0.401496444 | 0.007037126 | 0.094303796 |
| Lrrc20                | ENSMUSG00000037151                      | 0.273855439  | 0.007038378 | 0.094303796 |
| Pigyl                 | ENSMUSG00000010607                      | -0.355160798 | 0.007040484 | 0.094303796 |
| Rbfox3                | ENSMUSG00000025576                      | 0.408580415  | 0.007065849 | 0.094303796 |
| Trappc1               | ENSMUSG00000049299                      | -0.24420423  | 0.007074378 | 0.094303796 |
| Mrps14                | ENSMUSG00000058267                      | -0.467742138 | 0.007092123 | 0.094303796 |
| Qk                    | ENSMUSG00000062078                      | -0.357257623 | 0.007109048 | 0.094303796 |
| Ptprn2                | ENSMUSG00000056553                      | 0.385619982  | 0.007110909 | 0.094303796 |
| Egr1                  | ENSMUSG00000038418                      | 0.679168338  | 0.007112277 | 0.094303796 |
| Kcnh1                 | ENSMUSG00000058248                      | 0.434720262  | 0.007117151 | 0.094303796 |
| Plxnd1                | ENSMUSG00000030123                      | 0.625137857  | 0.007117198 | 0.094303796 |
| Sri                   | ENSMUSG00000003161                      | -0.288557729 | 0.007153803 | 0.094303796 |
| Cdh13                 | ENSMUSG00000031841                      | 0.34743553   | 0.007159126 | 0.094303796 |
| Sdhd                  | ENSMUSG00000000171                      | -0.227523379 | 0.007164462 | 0.094303796 |
| Flot2                 | ENSMUSG00000061981                      | 0.219526605  | 0.007165244 | 0.094303796 |
| Ngdn                  | ENSMUSG00000022204                      | -0.355986635 | 0.007181505 | 0.094303796 |
| Snx29                 | ENSMUSG00000071669                      | 0.394182295  | 0.007188675 | 0.094303796 |
| Amd1                  | ENSMUSG00000075232                      | -0.26143751  | 0.007190638 | 0.094303796 |
| Trmt11                | ENSMUSG00000019792                      | -0.440096157 | 0.007200124 | 0.094303796 |
| Cfap36                | ENSMUSG00000020462                      | -0.458144248 | 0.007200883 | 0.094303796 |
| Mbp                   | ENSMUSG00000041607                      | -0.188670184 | 0.007208477 | 0.094303796 |
| Zfp882+Zfp617         | ENSMUSG00000089857+ENSMUSG00000066880   | -0.30655245  | 0.007211738 | 0.094303796 |
| Zfp316                | ENSMUSG00000046658                      | 0.392570043  | 0.007222325 | 0.094303796 |
| Tap1                  | ENSMUSG00000037321                      | 0.420131394  | 0.007233718 | 0.094303796 |
| Nr1d2                 | ENSMUSG00000021775                      | -0.358489669 | 0.007241061 | 0.094303796 |
| Snora65+Rpl12         | ENSMUSG00000038900+ENSMUSG00000065124   | -0.466861586 | 0.007255599 | 0.094303796 |
| Arhgap17              | ENSMUSG00000030766                      | 0.431634773  | 0.00725593  | 0.094303796 |
| Utp20                 | ENSMUSG00000004356                      | 0.330401457  | 0.007257027 | 0.094303796 |
| Parp14                | ENSMUSG00000034422                      | 0.437259487  | 0.007261317 | 0.094303796 |
| Scaf4                 | ENSMUSG00000022983                      | 0.344897323  | 0.007268278 | 0.094303796 |
| Eif2s1                | ENSMUSG00000021116                      | -0.24897623  | 0.00728542  | 0.094303796 |
| Hmgxb3                | ENSMUSG00000024622                      | 0.45280895   | 0.007294    | 0.094303796 |
| Dbpht2                | ENSMUSG00000029878                      | -0.358363563 | 0.007302254 | 0.094303796 |
| E130114P18Rik         | ENSMUSG00000048747                      | -0.650164969 | 0.007303545 | 0.094303796 |
| Pcnx                  | ENSMUSG00000021140                      | 0.407434732  | 0.007305986 | 0.094303796 |
| Zfp943                | ENSMUSG00000053347                      | -0.46165991  | 0.007311908 | 0.094303796 |
| Abhd3                 | ENSMUSG00000002475                      | -0.205072201 | 0.00731608  | 0.094303796 |
| Mark4                 | ENSMUSG00000030397                      | 0.51680346   | 0.007316141 | 0.094303796 |
| Ktn1                  | ENSMUSG00000021843                      | -0.209479233 | 0.00733367  | 0.094303796 |
| Cfl2                  | ENSMUSG00000062929                      | -0.336338989 | 0.007336034 | 0.094303796 |
| Rmdn3                 | ENSMUSG00000070730                      | -0.213778962 | 0.007343713 | 0.094303796 |
| Snx5                  | ENSMUSG00000027423                      | -0.346636643 | 0.007343766 | 0.094303796 |

|                        |                                           |              |             |             |
|------------------------|-------------------------------------------|--------------|-------------|-------------|
| Snhg6                  | ENSMUSG00000098234                        | -0.506952408 | 0.007350785 | 0.094303796 |
| Anapc16                | ENSMUSG00000020107                        | -0.240061386 | 0.007351136 | 0.094303796 |
| Pde10a                 | ENSMUSG00000023868                        | 0.328099078  | 0.007353321 | 0.094303796 |
| Fam229b                | ENSMUSG000000051736                       | -0.412838505 | 0.007372375 | 0.09444478  |
| Tmem30a                | ENSMUSG000000032328                       | -0.425507189 | 0.007393543 | 0.094592979 |
| Hoxd3os1               | ENSMUSG000000052371                       | -0.423492878 | 0.007399384 | 0.094592979 |
| Al987944               | ENSMUSG000000056383                       | -0.32142991  | 0.007421376 | 0.094678731 |
| Rpl36al                | ENSMUSG000000049751                       | -0.469172608 | 0.00742821  | 0.094678731 |
| Rgs2                   | ENSMUSG000000026360                       | -0.276162764 | 0.007429629 | 0.094678731 |
| Nkiras1                | ENSMUSG000000021772                       | -0.236071257 | 0.00745362  | 0.09488427  |
| Mrps10                 | ENSMUSG000000034729                       | -0.29725985  | 0.007491465 | 0.095093117 |
| Cnpy2                  | ENSMUSG000000025381                       | -0.388334498 | 0.00749918  | 0.095093117 |
| Rab18                  | ENSMUSG000000073639                       | -0.299868968 | 0.007507114 | 0.095093117 |
| Zfp280d                | ENSMUSG000000038535                       | -0.303512727 | 0.007513332 | 0.095093117 |
| Gpr161                 | ENSMUSG000000040836                       | 0.359855332  | 0.007532071 | 0.095093117 |
| Cdo1                   | ENSMUSG000000033022                       | -0.344087028 | 0.007534185 | 0.095093117 |
| Zfp759                 | ENSMUSG000000057396                       | -0.571141513 | 0.007537795 | 0.095093117 |
| Ptp4a1                 | ENSMUSG000000026064                       | -0.328035624 | 0.007548354 | 0.095093117 |
| ldh1                   | ENSMUSG000000025950                       | -0.172092401 | 0.0075498   | 0.095093117 |
| Xrcc1                  | ENSMUSG000000051768                       | 0.20033428   | 0.00755286  | 0.095093117 |
| Slf1                   | ENSMUSG000000021597                       | -0.333890936 | 0.007556704 | 0.095093117 |
| Eif2a                  | ENSMUSG000000027810                       | -0.160637728 | 0.007582042 | 0.09509471  |
| Khynyn                 | ENSMUSG000000047153                       | 0.445841454  | 0.007587175 | 0.09509471  |
| Gm14326                | ENSMUSG000000078862                       | -0.592486383 | 0.007609837 | 0.09509471  |
| Mthfsl                 | ENSMUSG000000079427                       | -0.412457876 | 0.007643277 | 0.09509471  |
| Coprs                  | ENSMUSG000000031458                       | -0.373347694 | 0.007649831 | 0.09509471  |
| Rps7                   | ENSMUSG000000061477                       | -0.518238537 | 0.007652072 | 0.09509471  |
| Dnajb9                 | ENSMUSG000000014905                       | -0.341761706 | 0.007654608 | 0.09509471  |
| Smim3                  | ENSMUSG000000038059                       | -0.611697459 | 0.00766776  | 0.09509471  |
| Zfp61                  | ENSMUSG000000050605                       | 0.303723603  | 0.007670913 | 0.09509471  |
| Bola2                  | ENSMUSG000000047721                       | -0.479370482 | 0.00769225  | 0.09509471  |
| Apip                   | ENSMUSG000000010911                       | -0.240310717 | 0.007694412 | 0.09509471  |
| Rims3                  | ENSMUSG000000032890                       | 0.262769514  | 0.007704132 | 0.09509471  |
| Tln2                   | ENSMUSG000000052698                       | 0.549809     | 0.007709079 | 0.09509471  |
| Crk                    | ENSMUSG000000017776                       | -0.302908421 | 0.007715131 | 0.09509471  |
| Vti1b                  | ENSMUSG000000021124                       | -0.443248239 | 0.007720935 | 0.09509471  |
| Bola3                  | ENSMUSG000000045160                       | -0.492353988 | 0.007724339 | 0.09509471  |
| Mterf2                 | ENSMUSG000000049038                       | -0.402111822 | 0.007725182 | 0.09509471  |
| Kcna2                  | ENSMUSG000000040724                       | 0.30730757   | 0.007727372 | 0.09509471  |
| Rnf157                 | ENSMUSG000000052949                       | 0.450136572  | 0.007729521 | 0.09509471  |
| Mir5117+Snord80+Gm2622 | ENSMUSG000000077220+ENSMUSG000000065160+E | -0.458962102 | 0.007739842 | 0.09509471  |
| lqcb1                  | ENSMUSG000000022837                       | -0.354854934 | 0.007747397 | 0.09509471  |
| Notch3                 | ENSMUSG000000038146                       | 0.687446167  | 0.007754901 | 0.09509471  |
| Rps16                  | ENSMUSG000000037563                       | -0.456742051 | 0.007761898 | 0.09509471  |
| Mpc2                   | ENSMUSG000000026568                       | -0.334150092 | 0.007762412 | 0.09509471  |
| Nipal3                 | ENSMUSG000000028803                       | 0.378233866  | 0.007764818 | 0.09509471  |
| Tpmt                   | ENSMUSG000000021376                       | -0.267558561 | 0.007772535 | 0.09509471  |
| Prkra                  | ENSMUSG000000002731                       | -0.173179747 | 0.007778514 | 0.09509471  |
| Pla2g16                | ENSMUSG000000060675                       | -0.299190566 | 0.007799352 | 0.09509471  |
| Gtf2h5                 | ENSMUSG000000034345                       | -0.394941524 | 0.007815902 | 0.09509471  |
| Tbca                   | ENSMUSG000000042043                       | -0.527120607 | 0.007819986 | 0.09509471  |
| Igsf3                  | ENSMUSG000000042035                       | 0.504737844  | 0.007831607 | 0.09509471  |
| Syne3                  | ENSMUSG000000054150                       | 0.457779998  | 0.007832337 | 0.09509471  |
| Ptptr                  | ENSMUSG000000053141                       | 0.413840915  | 0.007835541 | 0.09509471  |
| Tpt1                   | ENSMUSG000000060126                       | -0.440633382 | 0.007838705 | 0.09509471  |
| Disp1                  | ENSMUSG000000030768                       | 0.363603554  | 0.007840217 | 0.09509471  |
| Gm14303                | ENSMUSG000000081344                       | -0.549503349 | 0.007840507 | 0.09509471  |
| O610012G03Rik          | ENSMUSG00000107002+ENSMUSG000000096232    | -0.351528052 | 0.007869058 | 0.095345169 |
| Hist2h2be              | ENSMUSG000000068854                       | -0.353949925 | 0.007890572 | 0.095504767 |

|                         |                                         |              |             |             |
|-------------------------|-----------------------------------------|--------------|-------------|-------------|
| Gmfb                    | ENSMUSG00000062014                      | -0.400841994 | 0.007899713 | 0.095504767 |
| Ptprj                   | ENSMUSG00000025314                      | 0.33602697   | 0.007905971 | 0.095504767 |
| Caskin2                 | ENSMUSG00000034471                      | 0.460098643  | 0.007920897 | 0.09556722  |
| Rps27a                  | ENSMUSG00000020460                      | -0.508305531 | 0.007927332 | 0.09556722  |
| Skp1a                   | ENSMUSG00000036309                      | -0.259714582 | 0.007941329 | 0.09556722  |
| Sdhaf3                  | ENSMUSG00000042505                      | -0.393191376 | 0.007943907 | 0.09556722  |
| Cyfp2                   | ENSMUSG00000020340                      | 0.423009056  | 0.007956356 | 0.09556722  |
| Ablim1                  | ENSMUSG00000025085                      | 0.278662417  | 0.007958656 | 0.09556722  |
| Ginm1                   | ENSMUSG00000040006                      | -0.304782891 | 0.007967001 | 0.095572332 |
| Snrk                    | ENSMUSG00000038145                      | 0.333827835  | 0.007980622 | 0.095640662 |
| Dock1                   | ENSMUSG00000058325                      | 0.410992111  | 0.007995848 | 0.095673684 |
| Zswim1                  | ENSMUSG00000017764                      | 0.341931879  | 0.008012741 | 0.095673684 |
| D3Ert751e               | ENSMUSG00000025766                      | -0.446073851 | 0.008013694 | 0.095673684 |
| Ccnd2                   | ENSMUSG00000000184                      | 0.231112756  | 0.008015089 | 0.095673684 |
| Ago1                    | ENSMUSG00000041530                      | 0.375555602  | 0.008105701 | 0.096266764 |
| Chd6                    | ENSMUSG00000057133                      | 0.316176253  | 0.008109687 | 0.096266764 |
| Triqk                   | ENSMUSG00000055963                      | -0.551192574 | 0.00812178  | 0.096266764 |
| Gstk1                   | ENSMUSG00000029864                      | -0.25915537  | 0.008133891 | 0.096266764 |
| BC003331                | ENSMUSG00000006010                      | -0.398527683 | 0.008136573 | 0.096266764 |
| Psm4                    | ENSMUSG00000032301                      | -0.408309987 | 0.008138453 | 0.096266764 |
| Tstd2                   | ENSMUSG00000035495                      | 0.255199447  | 0.008138548 | 0.096266764 |
| Mrpl12                  | ENSMUSG00000039640                      | -0.352024092 | 0.008144674 | 0.096266764 |
| Sema6d                  | ENSMUSG00000027200                      | 0.285532091  | 0.008155774 | 0.096266764 |
| Zmat2                   | ENSMUSG00000001383                      | -0.345412629 | 0.008165313 | 0.096266764 |
| Ndfip2                  | ENSMUSG00000053253                      | -0.237805363 | 0.00816676  | 0.096266764 |
| Hspb8                   | ENSMUSG00000041548                      | -0.190615607 | 0.008169708 | 0.096266764 |
| Mar-09                  | ENSMUSG00000040502                      | 0.322736764  | 0.008175705 | 0.096266764 |
| Exoc5                   | ENSMUSG00000061244                      | -0.391440259 | 0.008178091 | 0.096266764 |
| Snord50a+Snord50b+Snhg5 | ENSMUSG00000094263+ENSMUSG00000094179+E | -0.369259607 | 0.00818443  | 0.096266764 |
| Kcna1                   | ENSMUSG00000047976                      | 0.369397378  | 0.008218233 | 0.096519187 |
| Lyrn7                   | ENSMUSG00000020268                      | -0.367653493 | 0.00823051  | 0.096519187 |
| Zfp654                  | ENSMUSG00000047141                      | -0.491647824 | 0.008230895 | 0.096519187 |
| Wdr12                   | ENSMUSG00000026019                      | -0.18553668  | 0.008237882 | 0.096519187 |
| Lrba                    | ENSMUSG00000028080                      | 0.271503603  | 0.008273357 | 0.096803752 |
| Anapc10                 | ENSMUSG00000036977                      | -0.54197974  | 0.008296215 | 0.096803752 |
| Slc35f2                 | ENSMUSG00000042195                      | 0.283445725  | 0.008299649 | 0.096803752 |
| Mir7079+Snord68+Rpl13   | ENSMUSG00000098550+ENSMUSG00000000740+E | -0.38519424  | 0.008300615 | 0.096803752 |
| Icmt                    | ENSMUSG00000039662                      | 0.25543122   | 0.008302277 | 0.096803752 |
| Coro1c                  | ENSMUSG00000004530                      | 0.284210682  | 0.008310896 | 0.096810704 |
| Sec62                   | ENSMUSG00000027706                      | -0.195756134 | 0.008331446 | 0.096876858 |
| Stox2                   | ENSMUSG00000038143                      | 0.289306275  | 0.008347424 | 0.096876858 |
| Rnf213                  | ENSMUSG00000070327                      | 0.644051584  | 0.008361378 | 0.096876858 |
| Triap1                  | ENSMUSG00000029535                      | -0.288577978 | 0.008388347 | 0.096876858 |
| Tmem263                 | ENSMUSG00000060935                      | -0.326999607 | 0.008390396 | 0.096876858 |
| Gm10076                 | ENSMUSG00000060143                      | -0.613100347 | 0.008393683 | 0.096876858 |
| Leo1                    | ENSMUSG00000042487                      | 0.286912425  | 0.008396347 | 0.096876858 |
| Kctd4                   | ENSMUSG00000046523                      | -0.518967714 | 0.008398293 | 0.096876858 |
| B230118H07Rik+Rag1      | ENSMUSG00000061311+ENSMUSG00000027165   | -0.514314517 | 0.008420089 | 0.096876858 |
| Lingo4                  | ENSMUSG00000044505                      | 0.313748375  | 0.00843479  | 0.096876858 |
| Piezo1                  | ENSMUSG00000014444                      | 0.574097871  | 0.00843623  | 0.096876858 |
| Tbc1d15                 | ENSMUSG00000020130                      | -0.260824915 | 0.008446322 | 0.096876858 |
| Gpatch1                 | ENSMUSG00000063808                      | 0.18628884   | 0.008454938 | 0.096876858 |
| Ddx50                   | ENSMUSG00000020076                      | -0.274544371 | 0.008456318 | 0.096876858 |
| Mt3                     | ENSMUSG00000031760                      | -0.324984963 | 0.008465293 | 0.096876858 |
| Lzts1                   | ENSMUSG00000036306                      | 0.389113682  | 0.008467001 | 0.096876858 |
| Ppil3                   | ENSMUSG00000026035                      | -0.42168403  | 0.0084729   | 0.096876858 |
| Gng5                    | ENSMUSG00000068523                      | -0.488760067 | 0.008497514 | 0.096876858 |
| Mrpl27                  | ENSMUSG00000024414                      | -0.456802317 | 0.008500162 | 0.096876858 |
| Scarb1                  | ENSMUSG00000037936                      | 0.270104589  | 0.008500836 | 0.096876858 |

|                 |                                        |              |             |             |
|-----------------|----------------------------------------|--------------|-------------|-------------|
| Fam53b          | ENSMUSG00000030956                     | 0.342770342  | 0.0085064   | 0.096876858 |
| Atox1           | ENSMUSG00000018585                     | -0.288739543 | 0.008509    | 0.096876858 |
| Zdhhc20         | ENSMUSG00000021969                     | -0.358059499 | 0.008533882 | 0.096876858 |
| 0610037L13Rik   | ENSMUSG00000028608                     | -0.246103668 | 0.008539964 | 0.096876858 |
| Trim23          | ENSMUSG00000021712                     | -0.442502715 | 0.008539968 | 0.096876858 |
| Sdhaf4          | ENSMUSG00000026154                     | -0.512752816 | 0.008544152 | 0.096876858 |
| Cgnl1           | ENSMUSG00000032232                     | 0.500244599  | 0.008556333 | 0.096876858 |
| Mir1668+Adgre5  | ENSMUSG00000002885+ENSMUSG000000098465 | 0.270200409  | 0.008556811 | 0.096876858 |
| Pecam1          | ENSMUSG00000020717                     | 0.487344092  | 0.008565603 | 0.096876858 |
| Gm14306+Gm14305 | ENSMUSG00000078878+ENSMUSG00000078879  | -0.503873382 | 0.008574477 | 0.096876858 |
| Gabbr2          | ENSMUSG00000039809                     | 0.500971097  | 0.008582167 | 0.096876858 |
| Serp1           | ENSMUSG00000027808                     | -0.339808425 | 0.008604409 | 0.096876858 |
| 1700001L19Rik   | ENSMUSG00000021534                     | -0.518612803 | 0.008609133 | 0.096876858 |
| Mknk1           | ENSMUSG00000028708                     | 0.222722551  | 0.008610368 | 0.096876858 |
| Calca           | ENSMUSG00000030669                     | -0.492284286 | 0.00861461  | 0.096876858 |
| Myo16           | ENSMUSG00000039057                     | 0.584554394  | 0.008619697 | 0.096876858 |
| Snrnp200        | ENSMUSG00000003660                     | 0.397885659  | 0.008622429 | 0.096876858 |
| Rpl37a          | ENSMUSG00000046330                     | -0.404587924 | 0.008625533 | 0.096876858 |
| Cmpk1           | ENSMUSG00000028719                     | -0.349809528 | 0.008629651 | 0.096876858 |
| Cyb5a           | ENSMUSG00000024646                     | -0.46264081  | 0.008659614 | 0.097063508 |
| Atp6v0b         | ENSMUSG00000033379                     | -0.221735892 | 0.008669447 | 0.097063508 |
| Vamp8           | ENSMUSG00000050732                     | -0.553661818 | 0.00867086  | 0.097063508 |
| Tnks            | ENSMUSG00000031529                     | 0.320068459  | 0.008678449 | 0.097063508 |
| Acox3           | ENSMUSG00000029098                     | 0.257892371  | 0.008714317 | 0.097185128 |
| Ccdc3           | ENSMUSG00000026676                     | -0.292102963 | 0.00871462  | 0.097185128 |
| Arhgap35        | ENSMUSG00000058230                     | 0.330111377  | 0.008714707 | 0.097185128 |
| Fam45a          | ENSMUSG00000024993                     | -0.247232805 | 0.008723206 | 0.097185128 |
| Nynrin          | ENSMUSG00000075592                     | 0.540014078  | 0.008734244 | 0.097185128 |
| Memo1           | ENSMUSG00000058704                     | -0.314292144 | 0.008751496 | 0.097185128 |
| Socs6           | ENSMUSG00000056153                     | -0.425618267 | 0.008752201 | 0.097185128 |
| Ndufb9          | ENSMUSG00000022354                     | -0.438139995 | 0.008753748 | 0.097185128 |
| Rps27l          | ENSMUSG00000036781                     | -0.594658364 | 0.008764892 | 0.09721941  |
| Adcy1           | ENSMUSG00000020431                     | 0.52319725   | 0.008787915 | 0.097303492 |
| A330074K22Rik   | ENSMUSG00000097960                     | 0.44223981   | 0.008788599 | 0.097303492 |
| Uchl3           | ENSMUSG00000022111                     | -0.480096058 | 0.008807939 | 0.097366052 |
| Cbl             | ENSMUSG00000034342                     | 0.516674409  | 0.008824618 | 0.097366052 |
| Katnb1          | ENSMUSG00000031787                     | 0.285996667  | 0.008843563 | 0.097366052 |
| Rpl9            | ENSMUSG00000047215                     | -0.401725125 | 0.008846378 | 0.097366052 |
| Mrps36          | ENSMUSG00000061474                     | -0.338776091 | 0.008847509 | 0.097366052 |
| Sec61g          | ENSMUSG00000078974                     | -0.488737073 | 0.008849277 | 0.097366052 |
| Pcdh1           | ENSMUSG00000051375                     | 0.697612683  | 0.008850726 | 0.097366052 |
| Luzp1           | ENSMUSG00000001089                     | 0.223310409  | 0.008861167 | 0.097392135 |
| Brinp1          | ENSMUSG00000028351                     | 0.205039155  | 0.008872836 | 0.097413811 |
| Rsl1d1          | ENSMUSG00000005846                     | -0.212770279 | 0.00888225  | 0.097413811 |
| Hnrnpc          | ENSMUSG00000060373                     | -0.2419328   | 0.008889691 | 0.097413811 |
| Nr1h3+Gm13783   | ENSMUSG00000086206+ENSMUSG00000002108  | -0.340375854 | 0.008896283 | 0.097413811 |
| Ndufb6          | ENSMUSG00000071014                     | -0.457589989 | 0.008913805 | 0.097413811 |
| Ska2            | ENSMUSG00000020492                     | -0.46881263  | 0.008917051 | 0.097413811 |
| Abl2            | ENSMUSG00000026596                     | 0.411180801  | 0.008921178 | 0.097413811 |
| Lrtm2           | ENSMUSG00000055003                     | 0.404257677  | 0.008927716 | 0.097413811 |
| Slc19a1         | ENSMUSG00000001436                     | 0.299590212  | 0.008947305 | 0.097459368 |
| Itfg1           | ENSMUSG00000031703                     | -0.292499481 | 0.008949724 | 0.097459368 |
| Sstr2           | ENSMUSG00000047904                     | 0.309028129  | 0.008956119 | 0.097459368 |
| Yme1l1          | ENSMUSG00000026775                     | -0.343024206 | 0.008975999 | 0.097587712 |
| Erc1            | ENSMUSG00000030172                     | 0.331200476  | 0.008986766 | 0.097616824 |
| 4933404O12Rik   | ENSMUSG00000097908                     | 0.313458077  | 0.009005379 | 0.097679635 |
| Sv2c            | ENSMUSG00000051111                     | 0.488969298  | 0.009008737 | 0.097679635 |
| Zfp46           | ENSMUSG00000051351                     | 0.30895704   | 0.009065105 | 0.098201154 |
| Ttbk1           | ENSMUSG00000015599                     | 0.589796336  | 0.009073757 | 0.098201154 |

|                      |                                          |              |             |             |
|----------------------|------------------------------------------|--------------|-------------|-------------|
| Cdc123               | ENSMUSG00000039128                       | -0.289212392 | 0.009084545 | 0.098201154 |
| Tmem39b              | ENSMUSG00000053730                       | 0.391275107  | 0.009099701 | 0.098201154 |
| Ctxn2                | ENSMUSG00000074872                       | -0.546765773 | 0.0091044   | 0.098201154 |
| Chpt1                | ENSMUSG00000060002                       | -0.563225594 | 0.009112328 | 0.098201154 |
| Plxna4               | ENSMUSG00000029765                       | 0.604199816  | 0.009113796 | 0.098201154 |
| Adsl                 | ENSMUSG00000022407                       | 0.23577122   | 0.009144283 | 0.098441758 |
| Specc1l              | ENSMUSG00000033444                       | 0.241661067  | 0.009166537 | 0.098496834 |
| Golgb1               | ENSMUSG00000034243                       | 0.321712819  | 0.00917625  | 0.098496834 |
| Evc                  | ENSMUSG00000029122                       | 0.273128604  | 0.009181303 | 0.098496834 |
| Timm10               | ENSMUSG00000027076                       | -0.360119911 | 0.009182047 | 0.098496834 |
| Parvb                | ENSMUSG00000022438                       | 0.353246316  | 0.009219725 | 0.098759207 |
| Nebi                 | ENSMUSG00000053702                       | -0.424039779 | 0.009225689 | 0.098759207 |
| Golga2               | ENSMUSG00000002546                       | 0.325284924  | 0.009243876 | 0.098759207 |
| Timm9                | ENSMUSG00000021079                       | -0.267826595 | 0.009252216 | 0.098759207 |
| Ezr                  | ENSMUSG00000052397                       | 0.282365723  | 0.009255126 | 0.098759207 |
| Stxbp3               | ENSMUSG00000027882                       | -0.274455228 | 0.009259488 | 0.098759207 |
| Gm29514              | ENSMUSG00000099964                       | -0.439168119 | 0.00926379  | 0.098759207 |
| Col18a1              | ENSMUSG00000001435                       | 0.387234084  | 0.009297651 | 0.098872291 |
| Ppp6c                | ENSMUSG00000026753                       | -0.260578327 | 0.009306946 | 0.098872291 |
| Rpl15                | ENSMUSG00000012405                       | -0.403912836 | 0.009314361 | 0.098872291 |
| Arel1                | ENSMUSG00000042350                       | 0.273091542  | 0.00932828  | 0.098872291 |
| Spred1               | ENSMUSG00000027351                       | -0.345609656 | 0.009359601 | 0.098872291 |
| Nkain2               | ENSMUSG00000069670                       | -0.288405131 | 0.009362738 | 0.098872291 |
| Arpp19               | ENSMUSG00000007656                       | -0.275555778 | 0.009382885 | 0.098872291 |
| Anapc13              | ENSMUSG00000035048                       | -0.513077785 | 0.00939015  | 0.098872291 |
| Nedd4                | ENSMUSG00000032216                       | 0.227441232  | 0.009406951 | 0.098872291 |
| Mrps33               | ENSMUSG00000029918                       | -0.465480083 | 0.009406958 | 0.098872291 |
| Slc35c1              | ENSMUSG00000049922                       | 0.379271096  | 0.009409612 | 0.098872291 |
| Clasp1               | ENSMUSG00000064302                       | 0.419483221  | 0.009411998 | 0.098872291 |
| Pfdn2                | ENSMUSG00000006412                       | -0.412973485 | 0.009414029 | 0.098872291 |
| Asnsd1+Gm28551+Gm188 | ENSMUSG00000026095+ENSMUSG000000101838+E | -0.340067547 | 0.009419572 | 0.098872291 |
| Cebpzoz              | ENSMUSG00000062691                       | -0.517517102 | 0.009420576 | 0.098872291 |
| Dram2                | ENSMUSG00000027900                       | -0.446672223 | 0.009421333 | 0.098872291 |
| Minos1               | ENSMUSG00000050608                       | -0.387295896 | 0.009428347 | 0.098872291 |
| Tmem14a              | ENSMUSG00000025933                       | -0.430370079 | 0.009433109 | 0.098872291 |
| Mblac2               | ENSMUSG00000051098                       | -0.276349455 | 0.00943773  | 0.098872291 |
| Fam120aos            | ENSMUSG00000097059                       | -0.475722731 | 0.00944207  | 0.098872291 |
| Sesn2                | ENSMUSG00000028893                       | 0.424030087  | 0.009449261 | 0.098872291 |
| Snora7a+Rpl32        | ENSMUSG00000064563+ENSMUSG00000057841    | -0.452748874 | 0.009454642 | 0.098872291 |
| Abrac1               | ENSMUSG00000078453                       | -0.488361052 | 0.009476315 | 0.099013133 |
| Hectd1               | ENSMUSG00000035247                       | 0.328080115  | 0.009506135 | 0.099065452 |
| Ptges3               | ENSMUSG00000071072                       | -0.215514218 | 0.009509107 | 0.099065452 |
| Tm4sf1               | ENSMUSG00000027800                       | -0.349719538 | 0.009514979 | 0.099065452 |
| Mrpl41               | ENSMUSG00000036850                       | -0.39281089  | 0.009521476 | 0.099065452 |
| Cd302                | ENSMUSG00000060703                       | -0.472376669 | 0.009522367 | 0.099065452 |
| Naa50                | ENSMUSG00000022698                       | -0.381116953 | 0.00954102  | 0.099090212 |
| Patl1                | ENSMUSG00000046139                       | 0.22322602   | 0.009545718 | 0.099090212 |
| Dnajc21              | ENSMUSG00000044224                       | -0.181600224 | 0.009568881 | 0.099090212 |
| Sec11c               | ENSMUSG00000024516                       | -0.408214876 | 0.009596422 | 0.099090212 |
| Tmem9b               | ENSMUSG00000031021                       | -0.270998751 | 0.009598132 | 0.099090212 |
| Snrpd3               | ENSMUSG00000020180                       | -0.285001424 | 0.009609638 | 0.099090212 |
| Ift20                | ENSMUSG00000001105                       | -0.29377274  | 0.009614122 | 0.099090212 |
| Emc4                 | ENSMUSG00000027131                       | -0.286583119 | 0.009615822 | 0.099090212 |
| Tomm7                | ENSMUSG00000028998                       | -0.486033228 | 0.009621823 | 0.099090212 |
| Mir7011+Sema4a       | ENSMUSG00000028064+ENSMUSG00000098655    | 0.450624607  | 0.009627812 | 0.099090212 |
| Loxl3                | ENSMUSG00000000693                       | 0.482063777  | 0.009629624 | 0.099090212 |
| Trpm3                | ENSMUSG00000052387                       | 0.275280068  | 0.009630358 | 0.099090212 |
| Zfpm1                | ENSMUSG00000049577                       | 0.501713107  | 0.00963149  | 0.099090212 |
| Gm28403+Pign         | ENSMUSG00000101214+ENSMUSG00000056536    | -0.338762078 | 0.009648481 | 0.099180382 |

|                       |                                         |              |             |             |
|-----------------------|-----------------------------------------|--------------|-------------|-------------|
| 2010320M18Rik         | ENSMUSG00000100691                      | -0.633937543 | 0.009656691 | 0.099180382 |
| Acss3                 | ENSMUSG00000035948                      | -0.55929848  | 0.009673712 | 0.099189756 |
| Sidt1                 | ENSMUSG00000022696                      | 0.405705772  | 0.009674042 | 0.099189756 |
| 2010315B03Rik         | ENSMUSG00000074829                      | -0.329511711 | 0.009687823 | 0.099220966 |
| Tmem60                | ENSMUSG00000045435                      | -0.34116387  | 0.009697759 | 0.099220966 |
| Gm24158+Gm11613       | ENSMUSG00000093004+ENSMUSG00000085586   | -0.277903163 | 0.009706237 | 0.099220966 |
| Bloc1s2               | ENSMUSG00000057506                      | -0.417350716 | 0.009709974 | 0.099220966 |
| Ston2                 | ENSMUSG00000020961                      | 0.453818023  | 0.009720233 | 0.099241774 |
| Al504432              | ENSMUSG00000056145                      | -0.475605611 | 0.009734208 | 0.099246363 |
| Mrps15                | ENSMUSG00000028861                      | -0.290816957 | 0.009748431 | 0.099246363 |
| Echs1                 | ENSMUSG00000025465                      | -0.242701633 | 0.009753224 | 0.099246363 |
| Usp13                 | ENSMUSG00000056900                      | 0.42698559   | 0.009753579 | 0.099246363 |
| D8ErtD738e            | ENSMUSG00000019362                      | -0.366365629 | 0.009772308 | 0.099311499 |
| Gm24523+Rpl30         | ENSMUSG00000058600+ENSMUSG00000065899   | -0.485403095 | 0.009786275 | 0.099311499 |
| Nphp1                 | ENSMUSG00000027378                      | -0.266677136 | 0.009789228 | 0.099311499 |
| Gpr75+Asb3            | ENSMUSG00000043999+ENSMUSG00000020305   | -0.258009104 | 0.009792897 | 0.099311499 |
| Suz12                 | ENSMUSG00000017548                      | -0.343015727 | 0.009802681 | 0.099326665 |
| Pigf                  | ENSMUSG00000024145                      | -0.407387129 | 0.009820145 | 0.099326665 |
| Slc6a17               | ENSMUSG00000027894                      | 0.438083548  | 0.00982946  | 0.099326665 |
| Rpl17                 | ENSMUSG00000062328                      | -0.406770255 | 0.009838567 | 0.099326665 |
| Commd4                | ENSMUSG00000032299                      | -0.216493674 | 0.009844666 | 0.099326665 |
| Ythdf3                | ENSMUSG00000047213                      | -0.367334568 | 0.009848415 | 0.099326665 |
| Polr2h                | ENSMUSG00000021018                      | -0.392609003 | 0.009861605 | 0.099326665 |
| Srgap3                | ENSMUSG00000030257                      | 0.458487961  | 0.009874443 | 0.099326665 |
| Zfp942                | ENSMUSG00000071267                      | -0.455361719 | 0.009885084 | 0.099326665 |
| Atp6v1h               | ENSMUSG00000033793                      | -0.193672627 | 0.009889036 | 0.099326665 |
|                       | ENSMUSG00000106744                      | -0.258619076 | 0.009894124 | 0.099326665 |
| Nsa2                  | ENSMUSG00000060739                      | -0.420897268 | 0.009902712 | 0.099326665 |
| Ephb4                 | ENSMUSG00000029710                      | 0.440063733  | 0.009907373 | 0.099326665 |
| Cux1                  | ENSMUSG00000029705                      | 0.171014351  | 0.009909621 | 0.099326665 |
| SnapiN                | ENSMUSG00000001018                      | -0.182215982 | 0.009925818 | 0.099406454 |
| Tmx3                  | ENSMUSG00000024614                      | -0.469036472 | 0.009975708 | 0.099704175 |
| Fmnl3                 | ENSMUSG00000023008                      | 0.259589944  | 0.009980236 | 0.099704175 |
| Naa20                 | ENSMUSG00000002728                      | -0.51319814  | 0.009980332 | 0.099704175 |
| Chmp2b                | ENSMUSG00000004843                      | -0.174037555 | 0.010000416 | 0.099748816 |
| Wbp1                  | ENSMUSG00000030035                      | -0.359970508 | 0.010010436 | 0.099748816 |
| Tmbim4                | ENSMUSG00000020225                      | -0.289248132 | 0.010012641 | 0.099748816 |
| Neto2                 | ENSMUSG00000036902                      | -0.427519401 | 0.010017862 | 0.099748816 |
| Aqp4                  | ENSMUSG00000024411                      | -0.400928925 | 0.010027645 | 0.099761723 |
| Mrpl50                | ENSMUSG00000044018                      | -0.34753524  | 0.01004237  | 0.099761723 |
| Gm20498+Synj2bp+Cox16 | ENSMUSG00000021139+ENSMUSG00000090935+E | -0.446208148 | 0.01006364  | 0.099761723 |
| Gnpnat1               | ENSMUSG00000037722                      | -0.437360295 | 0.010069579 | 0.099761723 |
| Rel                   | ENSMUSG00000020275                      | 0.293380097  | 0.010073223 | 0.099761723 |
| Ndufaf5               | ENSMUSG00000027384                      | -0.24062438  | 0.010082407 | 0.099761723 |
| Tcof1                 | ENSMUSG00000024613                      | 0.551743579  | 0.010092786 | 0.099761723 |
| Tsc22d2               | ENSMUSG00000027806                      | -0.240677241 | 0.010095619 | 0.099761723 |
| Zfp35                 | ENSMUSG00000063281                      | -0.22839761  | 0.010098174 | 0.099761723 |
| Hmgcll1               | ENSMUSG00000007908                      | -0.279827606 | 0.010101825 | 0.099761723 |
| Ppp1cb+Gm43312        | ENSMUSG00000107197+ENSMUSG00000014956   | -0.344688252 | 0.010120741 | 0.099778505 |
| Vps29                 | ENSMUSG00000029462                      | -0.382686494 | 0.010141731 | 0.099778505 |
| Pcnx2                 | ENSMUSG00000060212                      | 0.600495238  | 0.010145087 | 0.099778505 |
| Eef1akmt1             | ENSMUSG00000021951                      | -0.281523756 | 0.010152915 | 0.099778505 |
| Sccpdh                | ENSMUSG00000038936                      | -0.189334735 | 0.010155711 | 0.099778505 |
| Zfp85                 | ENSMUSG00000058331                      | -0.523694286 | 0.010156813 | 0.099778505 |
| 6430548M08Rik         | ENSMUSG00000031824                      | 0.350747184  | 0.010162156 | 0.099778505 |
| S100a16               | ENSMUSG00000074457                      | -0.343222404 | 0.010169669 | 0.099778505 |
| Tmco1                 | ENSMUSG00000052428                      | -0.295779265 | 0.010181368 | 0.099812145 |
| Upf1                  | ENSMUSG00000058301                      | 0.542177416  | 0.010206123 | 0.099903519 |
| Tbc1d16               | ENSMUSG00000039976                      | 0.322776851  | 0.010215552 | 0.099903519 |

|                         |                                         |              |             |             |
|-------------------------|-----------------------------------------|--------------|-------------|-------------|
| Gabra4                  | ENSMUSG00000029211                      | -0.416359299 | 0.010219192 | 0.099903519 |
| Scpep1                  | ENSMUSG00000000278                      | 0.303319041  | 0.010227535 | 0.099903519 |
| Stk17b                  | ENSMUSG00000026094                      | -0.416149581 | 0.010235383 | 0.099903519 |
| Ece1                    | ENSMUSG00000057530                      | 0.497946701  | 0.010269903 | 0.099903519 |
| 2810428I15Rik           | ENSMUSG00000058833                      | -0.344817118 | 0.010279214 | 0.099903519 |
| Slc5a7                  | ENSMUSG00000023945                      | -0.294329184 | 0.010282575 | 0.099903519 |
| Azin1                   | ENSMUSG00000037458                      | -0.325824959 | 0.010285892 | 0.099903519 |
| Zc3h4                   | ENSMUSG00000059273                      | 0.484085059  | 0.010292271 | 0.099903519 |
| Gm27937+Gm27517+Gm27518 | ENSMUSG00000056579+ENSMUSG00000098503+E | -0.294745302 | 0.010296205 | 0.099903519 |
| Zfp386                  | ENSMUSG00000042063                      | -0.423291141 | 0.010303595 | 0.099903519 |
| 9230112E08Rik+Col20a1   | ENSMUSG00000070461+ENSMUSG00000016356   | 0.443365985  | 0.010305032 | 0.099903519 |
| Hpf1                    | ENSMUSG00000038005                      | -0.338236873 | 0.010314713 | 0.099903519 |
| Itgb8                   | ENSMUSG00000025321                      | -0.585769671 | 0.010314864 | 0.099903519 |
| Pnpla8                  | ENSMUSG00000036257                      | -0.342924428 | 0.010333286 | 0.099948428 |
| Papd7                   | ENSMUSG00000034575                      | 0.316555522  | 0.01034841  | 0.099948428 |
| Borcs7                  | ENSMUSG00000062376                      | -0.271923078 | 0.010373234 | 0.099948428 |
| Mef2d                   | ENSMUSG00000001419                      | 0.446606663  | 0.010373713 | 0.099948428 |
| Eps15                   | ENSMUSG00000028552                      | -0.306047333 | 0.010384844 | 0.099948428 |
| Lgalsl                  | ENSMUSG00000042363                      | -0.314202272 | 0.010388505 | 0.099948428 |
| Tiam2                   | ENSMUSG00000023800                      | 0.405842909  | 0.010402051 | 0.099948428 |
| Megf9                   | ENSMUSG00000039270                      | -0.266918222 | 0.010402482 | 0.099948428 |
| Mrps31                  | ENSMUSG00000031533                      | -0.266055364 | 0.010422995 | 0.099948428 |
|                         | ENSMUSG00000057924                      | -0.600203136 | 0.010437506 | 0.099948428 |
| Fam172a                 | ENSMUSG00000064138                      | -0.249234186 | 0.010438573 | 0.099948428 |
| Myd8f                   | ENSMUSG00000019579                      | -0.342730161 | 0.010442335 | 0.099948428 |
| Btdb9                   | ENSMUSG00000062202                      | 0.347298287  | 0.010470175 | 0.099948428 |
| Mmp15                   | ENSMUSG00000031790                      | 0.576923613  | 0.010499891 | 0.099948428 |
| Apba2                   | ENSMUSG00000030519                      | 0.342273826  | 0.010505006 | 0.099948428 |
| Prpf8                   | ENSMUSG00000020850                      | 0.545741406  | 0.010515611 | 0.099948428 |
| Rps17                   | ENSMUSG00000061787                      | -0.46040188  | 0.010522065 | 0.099948428 |
| Vps50                   | ENSMUSG00000001376                      | -0.198595255 | 0.010524926 | 0.099948428 |
| Cox7a2l                 | ENSMUSG00000024248                      | -0.353035581 | 0.01052878  | 0.099948428 |
| Dcun1d1                 | ENSMUSG00000027708                      | -0.47244048  | 0.010541411 | 0.099948428 |
| Galnt10                 | ENSMUSG00000020520                      | 0.236804616  | 0.010547632 | 0.099948428 |
| Prkca                   | ENSMUSG00000050965                      | 0.212791864  | 0.010554561 | 0.099948428 |
| Nab1                    | ENSMUSG00000002881                      | -0.223089286 | 0.010555834 | 0.099948428 |
| Anapc11                 | ENSMUSG00000025135                      | -0.236326898 | 0.010559159 | 0.099948428 |
| Sp3                     | ENSMUSG00000027109                      | -0.396748574 | 0.010562546 | 0.099948428 |
| Lasp1                   | ENSMUSG00000038366                      | 0.275029034  | 0.010567041 | 0.099948428 |
| Snrnp27                 | ENSMUSG00000001158                      | -0.486932859 | 0.010569795 | 0.099948428 |
| Zfp646                  | ENSMUSG00000049739                      | 0.425088192  | 0.010570964 | 0.099948428 |
| Gm42671+Golp3l          | ENSMUSG00000105460+ENSMUSG00000046519   | -0.226272737 | 0.010589646 | 0.099948428 |
| Dnajc19                 | ENSMUSG00000027679                      | -0.496300966 | 0.010595074 | 0.099948428 |
| Lrig1                   | ENSMUSG00000030029                      | 0.324712933  | 0.010596426 | 0.099948428 |
| St7l                    | ENSMUSG00000045576                      | -0.238351159 | 0.010620294 | 0.099948428 |
| Srsf3                   | ENSMUSG00000071172                      | -0.302791504 | 0.010625401 | 0.099948428 |
| Pdcl3                   | ENSMUSG00000026078                      | -0.45858396  | 0.010636789 | 0.099948428 |
| B230219D22Rik           | ENSMUSG00000045767                      | -0.342525064 | 0.010637993 | 0.099948428 |
| Ptpn21                  | ENSMUSG00000021009                      | 0.308618254  | 0.010641264 | 0.099948428 |
| Mrpl35                  | ENSMUSG00000052962                      | -0.279879124 | 0.010642963 | 0.099948428 |
| Psmg4                   | ENSMUSG00000071451                      | -0.494986102 | 0.010645666 | 0.099948428 |
| Gm27597+Gm11629+Rpl19   | ENSMUSG00000098992+ENSMUSG00000017404+E | -0.384978792 | 0.010649914 | 0.099948428 |
| Rab39                   | ENSMUSG00000055069                      | -0.499050339 | 0.010655933 | 0.099948428 |
| S100a1                  | ENSMUSG00000044080                      | -0.446613507 | 0.010662119 | 0.099948428 |
| Usp1                    | ENSMUSG00000028560                      | -0.315862248 | 0.010669544 | 0.099948428 |
| Glrx                    | ENSMUSG00000021591                      | -0.335621094 | 0.010675632 | 0.099948428 |

**Humanised mutant FUS drives progressive motor neuron degeneration without aggregation in 'FUSDelta14' knockin mice**

**Supplementary Table 2** Expression gene list for 12 months



**Humanised mutant FUS drives progressive motor neuron degeneration without aggregation in 'FUSDelta14' knockin mice**

Devoy et al. 2017

**Supplementary Table 3** GO term pathway enrichment analysis of genes dysregulated at 12 months of age in FUS Delta14 spinal cord.

| category   | over_represented_pvalue | under_represented_pvalue | numDEInCat | Down | Up  | numInCat | term                                                                                   | ontology | Category |
|------------|-------------------------|--------------------------|------------|------|-----|----------|----------------------------------------------------------------------------------------|----------|----------|
| GO:0044429 | 3.90E-20                |                          | 1          | 77   | 76  | 1        | 553 mitochondrial part                                                                 | CC       | 1        |
| GO:0070469 | 3.13E-19                |                          | 1          | 24   | 24  | 0        | 53 respiratory chain                                                                   | CC       | 1        |
| GO:0005743 | 4.95E-19                |                          | 1          | 55   | 54  | 1        | 316 mitochondrial inner membrane                                                       | CC       | 1        |
| GO:0005739 | 1.52E-18                |                          | 1          | 134  | 126 | 8        | 1426 mitochondrion                                                                     | CC       | 1        |
| GO:0005746 | 2.21E-18                |                          | 1          | 22   | 22  | 0        | 46 mitochondrial respiratory chain                                                     | CC       | 1        |
| GO:0044455 | 2.46E-17                |                          | 1          | 32   | 32  | 0        | 118 mitochondrial membrane part                                                        | CC       | 1        |
| GO:0005740 | 6.67E-17                |                          | 1          | 63   | 62  | 1        | 447 mitochondrial envelope                                                             | CC       | 1        |
| GO:0031966 | 2.00E-16                |                          | 1          | 60   | 59  | 1        | 420 mitochondrial membrane                                                             | CC       | 1        |
| GO:0005747 | 4.11E-14                |                          | 1          | 16   | 16  | 0        | 32 mitochondrial respiratory chain complex I                                           | CC       | 1        |
| GO:0030964 | 4.11E-14                |                          | 1          | 16   | 16  | 0        | 32 NADH dehydrogenase complex                                                          | CC       | 1        |
| GO:0045271 | 4.11E-14                |                          | 1          | 16   | 16  | 0        | 32 respiratory chain complex I                                                         | CC       | 1        |
| GO:1990204 | 1.79E-12                |                          | 1          | 20   | 20  | 0        | 65 oxidoreductase complex                                                              | CC       | 1        |
| GO:0045259 | 9.35E-09                |                          | 1          | 9    | 9   | 0        | 17 proton-transporting ATP synthase complex                                            | CC       | 1        |
| GO:0009055 | 1.65E-08                | 0.999999998              |            | 14   | 14  | 0        | 50 electron carrier activity                                                           | MF       | 1        |
| GO:0015078 | 2.43E-08                | 0.999999997              |            | 16   | 16  | 0        | 68 hydrogen ion transmembrane transporter activity                                     | MF       | 1        |
| GO:0005753 | 6.01E-08                | 0.999999998              |            | 8    | 8   | 0        | 15 mitochondrial proton-transporting ATP synthase complex                              | CC       | 1        |
| GO:0016469 | 2.15E-07                | 0.999999998              |            | 11   | 11  | 0        | 36 proton-transporting two-sector ATPase complex                                       | CC       | 1        |
| GO:0055114 | 3.90E-07                |                          | 1          | 62   | 57  | 5        | 748 oxidation-reduction process                                                        | BP       | 1        |
| GO:0004129 | 6.04E-07                | 0.999999967              |            | 8    | 8   | 0        | 19 cytochrome-c oxidase activity                                                       | MF       | 1        |
| GO:0015002 | 6.04E-07                | 0.999999967              |            | 8    | 8   | 0        | 19 heme-copper terminal oxidase activity                                               | MF       | 1        |
| GO:0016676 | 6.04E-07                | 0.999999967              |            | 8    | 8   | 0        | 19 oxidoreductase activity, acting on a heme group of donors, oxygen as acceptor       | MF       | 1        |
| GO:0016675 | 9.69E-07                | 0.999999943              |            | 8    | 8   | 0        | 20 oxidoreductase activity, acting on a heme group of donors                           | MF       | 1        |
| GO:0045263 | 1.19E-06                | 0.999999997              |            | 6    | 6   | 0        | 10 proton-transporting ATP synthase complex, coupling factor F(o)                      | CC       | 1        |
| GO:0006119 | 1.22E-06                | 0.999999903              |            | 9    | 9   | 0        | 27 oxidative phosphorylation                                                           | BP       | 1        |
| GO:0042773 | 2.31E-06                | 0.999999884              |            | 7    | 7   | 0        | 16 ATP synthesis coupled electron transport                                            | BP       | 1        |
| GO:0033177 | 3.78E-06                | 0.999999979              |            | 7    | 7   | 0        | 17 proton-transporting two-sector ATPase complex, proton-transporting domain           | CC       | 1        |
| GO:0008137 | 5.95E-06                | 0.999999636              |            | 7    | 7   | 0        | 18 NADH dehydrogenase (ubiquinone) activity                                            | MF       | 1        |
| GO:0050136 | 5.95E-06                | 0.999999636              |            | 7    | 7   | 0        | 18 NADH dehydrogenase (quinone) activity                                               | MF       | 1        |
| GO:0000276 | 7.68E-06                | 0.999999828              |            | 5    | 5   | 0        | 8 mitochondrial proton-transporting ATP synthase complex, coupling factor F(o)         | CC       | 1        |
| GO:0003954 | 9.07E-06                | 0.999999396              |            | 7    | 7   | 0        | 19 NADH dehydrogenase activity                                                         | MF       | 1        |
| GO:0016655 | 1.30E-05                | 0.999998782              |            | 8    | 8   | 0        | 27 oxidoreductase activity, acting on NAD(P)H, quinone or similar compound as acceptor | MF       | 1        |
| GO:0022900 | 1.34E-05                | 0.999998457              |            | 9    | 9   | 0        | 35 electron transport chain                                                            | BP       | 1        |
| GO:0042775 | 1.47E-05                | 0.999999253              |            | 6    | 6   | 0        | 14 mitochondrial ATP synthesis coupled electron transport                              | BP       | 1        |
| GO:0070069 | 3.21E-05                | 0.999998806              |            | 5    | 5   | 0        | 10 cytochrome complex                                                                  | CC       | 1        |
| GO:0005761 | 4.78E-05                | 0.999992342              |            | 10   | 10  | 0        | 50 mitochondrial ribosome                                                              | CC       | 1        |
| GO:0005759 | 9.93E-05                | 0.999969732              |            | 18   | 18  | 0        | 151 mitochondrial matrix                                                               | CC       | 1        |
| GO:0044391 | 1.96E-13                |                          | 1          | 26   | 26  | 0        | 104 ribosomal subunit                                                                  | CC       | 2        |
| GO:0005840 | 3.10E-13                |                          | 1          | 32   | 32  | 0        | 161 ribosome                                                                           | CC       | 2        |
| GO:0003735 | 5.33E-12                |                          | 1          | 24   | 24  | 0        | 101 structural constituent of ribosome                                                 | MF       | 2        |
| GO:0022626 | 2.35E-10                |                          | 1          | 18   | 18  | 0        | 66 cytosolic ribosome                                                                  | CC       | 2        |

|            |             |             |     |     |     |                                                  |    |   |
|------------|-------------|-------------|-----|-----|-----|--------------------------------------------------|----|---|
| GO:0030529 | 6.74E-10    | 1           | 53  | 51  | 2   | 493 ribonucleoprotein complex                    | CC | 2 |
| GO:0015935 | 3.21E-09    | 1           | 15  | 15  | 0   | 52 small ribosomal subunit                       | CC | 2 |
| GO:0022627 | 6.33E-09    | 1           | 12  | 12  | 0   | 33 cytosolic small ribosomal subunit             | CC | 2 |
| GO:0015934 | 1.39E-05    | 0.999997861 | 11  | 11  | 0   | 53 large ribosomal subunit                       | CC | 2 |
| GO:0006412 | 1.61E-05    | 0.999993454 | 35  | 35  | 0   | 373 translation                                  | BP | 2 |
| GO:0000313 | 4.78E-05    | 0.999992342 | 10  | 10  | 0   | 50 organellar ribosome                           | CC | 2 |
| GO:0005839 | 5.95E-06    | 0.999999636 | 7   | 7   | 0   | 18 proteasome core complex                       | CC | 3 |
| GO:0019773 | 7.68E-06    | 0.999999828 | 5   | 5   | 0   | 8 proteasome core complex, alpha-subunit complex | CC | 3 |
| GO:0004298 | 1.34E-05    | 0.999999031 | 7   | 7   | 0   | 20 threonine-type endopeptidase activity         | MF | 3 |
| GO:0070003 | 1.34E-05    | 0.999999031 | 7   | 7   | 0   | 20 threonine-type peptidase activity             | MF | 3 |
| GO:0070062 | 1.96E-09    | 1           | 147 | 117 | 30  | 2137 extracellular vesicular exosome             | CC | 4 |
| GO:0043230 | 2.15E-09    | 1           | 147 | 117 | 30  | 2140 extracellular organelle                     | CC | 4 |
| GO:0065010 | 2.15E-09    | 1           | 147 | 117 | 30  | 2140 extracellular membrane-bounded organelle    | CC | 4 |
| GO:0031982 | 5.04E-08    | 1           | 174 | 134 | 40  | 2783 vesicle                                     | CC | 5 |
| GO:0031988 | 8.20E-08    | 1           | 163 | 127 | 36  | 2583 membrane-bounded vesicle                    | CC | 5 |
| GO:0005198 | 2.08E-06    | 0.999999241 | 35  | 28  | 7   | 340 structural molecule activity                 | MF | 6 |
| GO:0003723 | 0.000106434 | 0.999936287 | 83  | 74  | 9   | 1270 RNA binding                                 | MF | 6 |
| GO:0045116 | 0.000111545 | 0.999997012 | 4   | 4   | 0   | 7 protein neddylation                            | BP | 6 |
| GO:0019866 | 6.81E-19    | 1           | 57  | 55  | 2   | 340 organelle inner membrane                     | CC | 7 |
| GO:0031967 | 2.50E-14    | 1           | 76  | 71  | 5   | 686 organelle envelope                           | CC | 7 |
| GO:0031975 | 3.14E-14    | 1           | 76  | 71  | 5   | 689 envelope                                     | CC | 7 |
| GO:0031090 | 6.92E-08    | 1           | 97  | 88  | 9   | 1317 organelle membrane                          | CC | 7 |
| GO:0044444 | 3.05E-15    | 1           | 324 | 275 | 49  | 5259 cytoplasmic part                            | CC | 8 |
| GO:0043227 | 6.35E-12    | 1           | 467 | 365 | 102 | 8837 membrane-bounded organelle                  | CC | 8 |
| GO:0005737 | 3.03E-11    | 1           | 424 | 340 | 84  | 7880 cytoplasm                                   | CC | 8 |
| GO:0044446 | 2.58E-10    | 1           | 244 | 207 | 37  | 3996 intracellular organelle part                | CC | 8 |
| GO:0044422 | 8.66E-10    | 1           | 249 | 211 | 38  | 4150 organelle part                              | CC | 8 |
| GO:0043226 | 9.72E-10    | 1           | 489 | 381 | 108 | 9610 organelle                                   | CC | 8 |
| GO:0043231 | 3.43E-09    | 1           | 414 | 332 | 82  | 7875 intracellular membrane-bounded organelle    | CC | 8 |
| GO:0043229 | 7.98E-09    | 1           | 449 | 360 | 89  | 8747 intracellular organelle                     | CC | 8 |
| GO:0044421 | 9.02E-08    | 1           | 173 | 135 | 38  | 2787 extracellular region part                   | CC | 8 |
| GO:0032991 | 1.19E-07    | 1           | 217 | 176 | 41  | 3702 macromolecular complex                      | CC | 8 |
| GO:0005576 | 1.26E-07    | 1           | 191 | 147 | 44  | 3167 extracellular region                        | CC | 8 |
| GO:0044424 | 2.32E-07    | 1           | 494 | 392 | 102 | 10026 intracellular part                         | CC | 8 |
| GO:0044445 | 1.08E-06    | 0.999999736 | 21  | 21  | 0   | 144 cytosolic part                               | CC | 8 |
| GO:0005622 | 2.31E-06    | 0.999999068 | 497 | 394 | 103 | 10208 intracellular                              | CC | 8 |

### Humanised mutant FUS drives progressive motor neuron degeneration without aggregation in 'FUSDelta14' knockin mice

Devoy et al. 2017

Supplementary Table 3 GO term pathway enrichment analysis of genes dysregulated at 12 months of age in FUS Delta14 spinal cord.
