# Supplementary material for: Humanized mutant FUS drives progressive motor neuron degeneration without aggregation in ‘FUSDelta14’ knockin mice
Source: PubMed Central journal article supplement (PMC5841203; doi:10.1093/brain/awx248), 2017-10-07
Supplement: brain-2017-00604-file009_awx248.pdf [file brain-2017-00604-file009_awx248.pdf]

**Humanised mutant FUS drives progressive motor neuron degeneration without aggregation in 'FUSDelta14' knockin mice**

Devoy et al. 2017

**Supplementary Table 4** Gene Set Enrichment Analysis (GSEA) summary of gene lists dysregulated at 12 months of age in FUS Delta14 spinal cord

| NAME                                                   | GS<br> follow link to MSigDB                           | GS DETAILS  | SIZE | ES          | NES        | NOM p-val | FDR q-val | FWER p-val | RANK AT MAX | LEADING EDGE                    |
|--------------------------------------------------------|--------------------------------------------------------|-------------|------|-------------|------------|-----------|-----------|------------|-------------|---------------------------------|
| CYTOCHROME C OXIDASE ACTIVITY                          | CYTOCHROME C OXIDASE ACTIVITY                          | Details ... | 18   | -0.6647342  | -3.4626806 | 0.000     | 0.000     | 0.000      | 2556        | tags=89%, list=23%, signal=115% |
| CYTOSOLIC RIBOSOME                                     | CYTOSOLIC RIBOSOME                                     | Details ... | 74   | -0.64356744 | -6.4225993 | 0.000     | 0.000     | 0.000      | 1946        | tags=81%, list=17%, signal=97%  |
| LARGE RIBOSOMAL SUBUNIT                                | LARGE RIBOSOMAL SUBUNIT                                | Details ... | 85   | -0.56857693 | -6.306569  | 0.000     | 0.000     | 0.000      | 1874        | tags=73%, list=17%, signal=87%  |
| MITOCHONDRIAL PROTON TRANSPORTING ATP SYNTHASE COMPLEX | MITOCHONDRIAL PROTON TRANSPORTING ATP SYNTHASE COMPLEX | Details ... | 15   | -0.67466897 | -3.169331  | 0.000     | 0.000     | 0.000      | 1433        | tags=80%, list=13%, signal=91%  |
| MITOCHONDRIAL RESPIRATORY CHAIN COMPLEX I              | MITOCHONDRIAL RESPIRATORY CHAIN COMPLEX I              | Details ... | 35   | -0.5920298  | -4.0417976 | 0.000     | 0.000     | 0.000      | 2057        | tags=77%, list=18%, signal=94%  |
| MITOCHONDRIAL_RESPIRATORY_CHAIN                        | MITOCHONDRIAL_RESPIRATORY_CHAIN                        | Details ... | 59   | -0.5750217  | -5.16118   | 0.000     | 0.000     | 0.000      | 3318        | tags=86%, list=29%, signal=122% |
| MITOCHONDRIAL RIBOSOME                                 | MITOCHONDRIAL RIBOSOME                                 | Details ... | 80   | -0.45795047 | -4.818244  | 0.000     | 0.000     | 0.000      | 4060        | tags=81%, list=36%, signal=126% |
| MITOCHONDRION                                          | MITOCHONDRION                                          | Details ... | 1323 | -0.13719822 | -5.364362  | 0.000     | 0.000     | 0.000      | 3814        | tags=46%, list=34%, signal=61%  |
| PROTEASOME CORE COMPLEX ALPHA SUBUNIT COMPLEX          | PROTEASOME CORE COMPLEX ALPHA SUBUNIT COMPLEX          | Details ... | 7    | -0.79408056 | -2.5507689 | 0.000     | 0.000     | 0.000      | 722         | tags=86%, list=6%, signal=91%   |
| PROTEASOME CORE COMPLEX                                | PROTEASOME CORE COMPLEX                                | Details ... | 17   | -0.66492707 | -3.30452   | 0.000     | 0.000     | 0.000      | 2479        | tags=88%, list=22%, signal=113% |
| RIBOSOME                                               | RIBOSOME                                               | Details ... | 176  | -0.46945027 | -7.1704936 | 0.000     | 0.000     | 0.000      | 3202        | tags=74%, list=28%, signal=102% |
| SMALL RIBOSOMAL SUBUNIT                                | SMALL RIBOSOMAL SUBUNIT                                | Details ... | 61   | -0.5441493  | -5.056789  | 0.000     | 0.000     | 0.000      | 3160        | tags=82%, list=28%, signal=113% |
| TRANSLATION                                            | TRANSLATION                                            | Details ... | 437  | -0.14763926 | -3.5463178 | 0.000     | 0.000     | 0.000      | 1428        | tags=27%, list=13%, signal=29%  |

**Humanised mutant FUS drives progressive motor neuron degeneration without aggregation in 'FUSDelta14' knockin mice**  
**Devoy et al. 2017**

**Supplementary Table 5** Gene Set Enrichment Analysis (GSEA) **Ribosome** - list of genes dysregulated at 12 months of age in FUS Delta14 spinal cord.

| NAME   | PROBE         | GENE SYMBOL | GENE_TITLE | RANK IN GENE LIST | RANK METRIC SCORE | RUNNING ES  | CORE ENRICHMENT |
|--------|---------------|-------------|------------|-------------------|-------------------|-------------|-----------------|
| row_0  | Abcf1         | null        | null       | 1251              | 24.42557335       | -0.10632463 | No              |
| row_1  | Mrps2         | null        | null       | 1259              | 24.30971718       | -0.10126955 | No              |
| row_2  | Rrbp1         | null        | null       | 1568              | 18.44819832       | -0.12316406 | No              |
| row_3  | Dhx9          | null        | null       | 1599              | 17.95916367       | -0.12016825 | No              |
| row_4  | Rps6kl1       | null        | null       | 1888              | 14.37590027       | -0.14027208 | No              |
| row_5  | Nsun4         | null        | null       | 2063              | 12.55372238       | -0.1501691  | No              |
| row_6  | Gemin5        | null        | null       | 2095              | 12.22449017       | -0.14726283 | No              |
| row_7  | Eif2ak4       | null        | null       | 2209              | 11.23381615       | -0.15169829 | No              |
| row_8  | Larp4b        | null        | null       | 2242              | 10.85581589       | -0.14888154 | No              |
| row_9  | Mrps5         | null        | null       | 3394              | 4.753861904       | -0.24625282 | No              |
| row_10 | Rps4l         | null        | null       | 3766              | 3.709308386       | -0.27378795 | No              |
| row_11 | Mrps27        | null        | null       | 3795              | 3.650242805       | -0.27061307 | No              |
| row_12 | Jrk           | null        | null       | 3799              | 3.641199589       | -0.26519984 | No              |
| row_13 | Surf6         | null        | null       | 4154              | 2.883627653       | -0.2912129  | No              |
| row_14 | Mrpl4         | null        | null       | 4233              | 2.762340069       | -0.2925147  | No              |
| row_15 | Hba-a1        | null        | null       | 4423              | 2.471960068       | -0.30375472 | No              |
| row_16 | Eif2d         | null        | null       | 4437              | 2.456758738       | -0.29923683 | No              |
| row_17 | Mrps18b       | null        | null       | 4504              | 2.353528023       | -0.29946423 | No              |
| row_18 | Mrpl38        | null        | null       | 4526              | 2.314575672       | -0.2956626  | No              |
| row_19 | Hba-a2        | null        | null       | 5330              | 1.447466493       | -0.36187622 | No              |
| row_20 | Mrpl45        | null        | null       | 5758              | 1.177889824       | -0.3944252  | No              |
| row_21 | Dap3          | null        | null       | 5767              | 1.17144978        | -0.38945967 | No              |
| row_22 | Mrpl37        | null        | null       | 5908              | 1.105024099       | -0.39631256 | No              |
| row_23 | Nle1          | null        | null       | 6077              | 1.017181993       | -0.40567237 | No              |
| row_24 | Mtg2          | null        | null       | 6111              | 1.00466454        | -0.40294516 | No              |
| row_25 | Nufip1        | null        | null       | 6305              | -1.082650304      | -0.4145433  | No              |
| row_26 | Mrpl44        | null        | null       | 6398              | -1.143575311      | -0.41709858 | No              |
| row_27 | Mpv17l2       | null        | null       | 6543              | -1.227466464      | -0.42430958 | No              |
| row_28 | Mrpl10        | null        | null       | 6750              | -1.36965251       | -0.43707168 | No              |
| row_29 | Mrpl43        | null        | null       | 6913              | -1.524495244      | -0.4458943  | No              |
| row_30 | Mrpl28        | null        | null       | 6929              | -1.549821138      | -0.44155547 | No              |
| row_31 | Prmt3         | null        | null       | 7022              | -1.639651895      | -0.44411075 | No              |
| row_32 | Eef2          | null        | null       | 7128              | -1.775381327      | -0.44782993 | No              |
| row_33 | Canx          | null        | null       | 7232              | -1.933994889      | -0.4513701  | No              |
| row_34 | Mrpl49        | null        | null       | 7286              | -2.00241971       | -0.45043352 | No              |
| row_35 | Mrps30        | null        | null       | 7406              | -2.212972641      | -0.45540622 | No              |
| row_36 | Ptcd3         | null        | null       | 7407              | -2.213463545      | -0.44972438 | No              |
| row_37 | Mrpl2         | null        | null       | 7421              | -2.225229502      | -0.4452065  | No              |
| row_38 | Mrps7         | null        | null       | 7426              | -2.229056597      | -0.4398828  | No              |
| row_39 | Mrps18a       | null        | null       | 7513              | -2.375406742      | -0.44190088 | No              |
| row_40 | Mrps12        | null        | null       | 7532              | -2.407607555      | -0.4378307  | No              |
| row_41 | Mrpl3         | null        | null       | 7668              | -2.72729826       | -0.4442359  | No              |
| row_42 | Mrpl19        | null        | null       | 7721              | -2.858035564      | -0.4432098  | No              |
| row_43 | Gadd45gip1    | null        | null       | 7784              | -2.999709368      | -0.44307905 | No              |
| row_44 | Mrpl9         | null        | null       | 8043              | -3.780286789      | -0.4604969  | No              |
| row_45 | Ppargc1a      | null        | null       | 8144              | -4.17288065       | -0.46376842 | Yes             |
| row_46 | Mrpl34        | null        | null       | 8181              | -4.340406895      | -0.46130982 | Yes             |
| row_47 | Mrps9         | null        | null       | 8186              | -4.361042976      | -0.45598614 | Yes             |
| row_48 | Mrps11        | null        | null       | 8273              | -4.816332817      | -0.4580042  | Yes             |
| row_49 | Zfp622        | null        | null       | 8297              | -4.947680473      | -0.45438164 | Yes             |
| row_50 | Mrpl16        | null        | null       | 8337              | -5.149276733      | -0.45219165 | Yes             |
| row_51 | Mrps26        | null        | null       | 8364              | -5.248119354      | -0.4488377  | Yes             |
| row_52 | 2810006K23Rik | null        | null       | 8469              | -5.951928139      | -0.45246738 | Yes             |
| row_53 | Mrps25        | null        | null       | 8533              | -6.375924587      | -0.45242617 | Yes             |
| row_54 | Mrps23        | null        | null       | 8588              | -6.735428333      | -0.45157915 | Yes             |
| row_55 | Mrps35        | null        | null       | 8642              | -7.18482542       | -0.45064262 | Yes             |
| row_56 | Mtg1          | null        | null       | 8715              | -7.807396889      | -0.45140722 | Yes             |
| row_57 | Mrpl14        | null        | null       | 8821              | -8.893301964      | -0.4551264  | Yes             |
| row_58 | Tma16         | null        | null       | 8859              | -9.341950417      | -0.45275733 | Yes             |
| row_59 | Nufip2        | null        | null       | 8943              | -10.41436386      | -0.4545068  | Yes             |
| row_60 | Mrps17        | null        | null       | 9010              | -11.25024986      | -0.4547342  | Yes             |

|         |          |      |      |       |              |             |     |
|---------|----------|------|------|-------|--------------|-------------|-----|
| row_61  | Larp4    | null | null | 9087  | -12.32528591 | -0.45585692 | Yes |
| row_62  | Hspa14   | null | null | 9096  | -12.52689171 | -0.45089138 | Yes |
| row_63  | Nck1     | null | null | 9108  | -12.64617157 | -0.44619444 | Yes |
| row_64  | Rpl7l1   | null | null | 9229  | -14.61259651 | -0.45125663 | Yes |
| row_65  | Mcts2    | null | null | 9400  | -18.27958298 | -0.46079552 | Yes |
| row_66  | Apod     | null | null | 9448  | -19.3204422  | -0.45932177 | Yes |
| row_67  | Rplp0    | null | null | 9472  | -19.87993813 | -0.45569924 | Yes |
| row_68  | Mrpl57   | null | null | 9499  | -20.60731506 | -0.45234528 | Yes |
| row_69  | Mrpl55   | null | null | 9547  | -22.21569252 | -0.45087153 | Yes |
| row_70  | Rpl27    | null | null | 9637  | -25.04844666 | -0.4531582  | Yes |
| row_71  | Mrps16   | null | null | 9645  | -25.3657341  | -0.44810313 | Yes |
| row_72  | Nsun3    | null | null | 9696  | -27.04464722 | -0.44689798 | Yes |
| row_73  | Rps11    | null | null | 9700  | -27.1452446  | -0.44148475 | Yes |
| row_74  | Zcchc17  | null | null | 9710  | -27.51429367 | -0.43660873 | Yes |
| row_75  | Mrpl39   | null | null | 9766  | -29.67875099 | -0.43585128 | Yes |
| row_76  | Fau      | null | null | 9869  | -34.39938354 | -0.43930188 | Yes |
| row_77  | Rps6     | null | null | 9871  | -34.48515701 | -0.4337096  | Yes |
| row_78  | Rpl8     | null | null | 9877  | -34.74137497 | -0.42847544 | Yes |
| row_79  | Mrpl17   | null | null | 9948  | -38.69493866 | -0.42906097 | Yes |
| row_80  | Pnpt1    | null | null | 9957  | -39.1652565  | -0.42409542 | Yes |
| row_81  | Mrpl46   | null | null | 9972  | -40.10016251 | -0.41966707 | Yes |
| row_82  | Rpl4     | null | null | 10000 | -41.64800644 | -0.41640264 | Yes |
| row_83  | Mrpl23   | null | null | 10021 | -43.24662781 | -0.4125115  | Yes |
| row_84  | Rps10    | null | null | 10036 | -44.91659164 | -0.40808314 | Yes |
| row_85  | Rps9     | null | null | 10042 | -45.18154907 | -0.40284902 | Yes |
| row_86  | Snca     | null | null | 10093 | -48.96699905 | -0.40164387 | Yes |
| row_87  | Rps15a   | null | null | 10155 | -53.77290344 | -0.4014236  | Yes |
| row_88  | Mrpl15   | null | null | 10165 | -54.14429855 | -0.3965476  | Yes |
| row_89  | Mrpl40   | null | null | 10166 | -54.17938995 | -0.39086574 | Yes |
| row_90  | Mrps28   | null | null | 10168 | -54.25280762 | -0.38527346 | Yes |
| row_91  | Mterf4   | null | null | 10187 | -56.06287766 | -0.38120326 | Yes |
| row_92  | Mrpl21   | null | null | 10188 | -56.15470123 | -0.37552145 | Yes |
| row_93  | Elavl4   | null | null | 10207 | -57.84687424 | -0.37145123 | Yes |
| row_94  | Rpl36    | null | null | 10253 | -63.1675148  | -0.36979842 | Yes |
| row_95  | Rpl28    | null | null | 10265 | -64.4839859  | -0.36510146 | Yes |
| row_96  | Rpl22    | null | null | 10300 | -69.77206421 | -0.36246377 | Yes |
| row_97  | Rps13    | null | null | 10334 | -73.37827301 | -0.35973656 | Yes |
| row_98  | Aurkaip1 | null | null | 10335 | -73.55129242 | -0.35405475 | Yes |
| row_99  | Rpl18    | null | null | 10353 | -75.43097687 | -0.349895   | Yes |
| row_100 | Mrpl20   | null | null | 10377 | -78.18450928 | -0.34627247 | Yes |
| row_101 | Rpl35a   | null | null | 10381 | -78.56951141 | -0.34085923 | Yes |
| row_102 | Rpl10a   | null | null | 10385 | -78.81176758 | -0.33544603 | Yes |
| row_103 | Chchd1   | null | null | 10430 | -85.17641449 | -0.33370367 | Yes |
| row_104 | Rpl14    | null | null | 10434 | -85.91460419 | -0.32829046 | Yes |
| row_105 | Rps25    | null | null | 10446 | -88.5580368  | -0.32359353 | Yes |
| row_106 | Mrpl32   | null | null | 10459 | -91.17756653 | -0.3189861  | Yes |
| row_107 | Mrpl11   | null | null | 10461 | -91.59705353 | -0.3133938  | Yes |
| row_108 | Mrpl35   | null | null | 10471 | -93.95879364 | -0.30851778 | Yes |
| row_109 | Rps17    | null | null | 10484 | -95.03837585 | -0.30391037 | Yes |
| row_110 | Mrps31   | null | null | 10487 | -95.94171143 | -0.29840764 | Yes |
| row_111 | Mrpl50   | null | null | 10512 | -99.57808685 | -0.2948746  | Yes |
| row_112 | Rpl17    | null | null | 10527 | -101.6408234 | -0.29044628 | Yes |
| row_113 | Mrps15   | null | null | 10533 | -102.5806046 | -0.28521213 | Yes |
| row_114 | Mrpl41   | null | null | 10549 | -105.0257263 | -0.2808733  | Yes |
| row_115 | Mrps33   | null | null | 10560 | -106.3042831 | -0.2760868  | Yes |
| row_116 | Rpl15    | null | null | 10565 | -107.3610916 | -0.27076313 | Yes |
| row_117 | Mrps36   | null | null | 10582 | -113.0261688 | -0.26651385 | Yes |
| row_118 | Rpl9     | null | null | 10583 | -113.0406189 | -0.26083204 | Yes |
| row_119 | Rps27l   | null | null | 10585 | -114.0915375 | -0.25523975 | Yes |
| row_120 | Rpl37a   | null | null | 10595 | -115.9348679 | -0.25036374 | Yes |
| row_121 | Mrpl27   | null | null | 10604 | -117.6448135 | -0.24539818 | Yes |
| row_122 | Mrpl12   | null | null | 10623 | -122.7796249 | -0.24132797 | Yes |
| row_123 | Rps27a   | null | null | 10632 | -126.1458435 | -0.23636241 | Yes |
| row_124 | Rps16    | null | null | 10643 | -128.8344727 | -0.23157594 | Yes |
| row_125 | Rps7     | null | null | 10653 | -130.6835632 | -0.22669992 | Yes |
| row_126 | Eif2a    | null | null | 10657 | -131.8905945 | -0.2212867  | Yes |

|         |         |      |      |       |              |              |     |
|---------|---------|------|------|-------|--------------|--------------|-----|
| row_127 | Mrps10  | null | null | 10666 | -133.4852448 | -0.21632116  | Yes |
| row_128 | Eif2s1  | null | null | 10684 | -137.2604523 | -0.2121614   | Yes |
| row_129 | Mrps14  | null | null | 10694 | -141.0014954 | -0.20728539  | Yes |
| row_130 | Npm1    | null | null | 10698 | -142.3594055 | -0.20187217  | Yes |
| row_131 | Rpl38   | null | null | 10710 | -146.3634949 | -0.19717522  | Yes |
| row_132 | Rpl34   | null | null | 10718 | -148.569458  | -0.19212013  | Yes |
| row_133 | Rps12   | null | null | 10721 | -150.4437408 | -0.18661739  | Yes |
| row_134 | Rps24   | null | null | 10724 | -151.2233276 | -0.18111463  | Yes |
| row_135 | Rpl26   | null | null | 10725 | -151.5032654 | -0.17543282  | Yes |
| row_136 | Rpl35   | null | null | 10727 | -151.7383575 | -0.16984053  | Yes |
| row_137 | Rpl23   | null | null | 10762 | -162.8869324 | -0.16720285  | Yes |
| row_138 | Rplp1   | null | null | 10771 | -166.6326599 | -0.1622373   | Yes |
| row_139 | Mrpl24  | null | null | 10786 | -171.3456726 | -0.15780894  | Yes |
| row_140 | Mrpl18  | null | null | 10794 | -175.7474976 | -0.15275386  | Yes |
| row_141 | Rps15   | null | null | 10803 | -178.0572357 | -0.14778832  | Yes |
| row_142 | Rpl11   | null | null | 10807 | -179.357605  | -0.1423751   | Yes |
| row_143 | Rpl29   | null | null | 10819 | -183.9489899 | -0.13767815  | Yes |
| row_144 | Rpl37   | null | null | 10851 | -206.2558441 | -0.13477187  | Yes |
| row_145 | Rps21   | null | null | 10854 | -207.5920258 | -0.12926912  | Yes |
| row_146 | Rps23   | null | null | 10860 | -209.1409454 | -0.12403497  | Yes |
| row_147 | Rps28   | null | null | 10871 | -214.1931915 | -0.11924849  | Yes |
| row_148 | Mrpl54  | null | null | 10882 | -220.9447937 | -0.114462    | Yes |
| row_149 | Rpl18a  | null | null | 10891 | -225.9889374 | -0.10949645  | Yes |
| row_150 | Mrpl47  | null | null | 10898 | -228.3879852 | -0.10435183  | Yes |
| row_151 | Rps18   | null | null | 10906 | -235.6907349 | -0.09929675  | Yes |
| row_152 | Mrps21  | null | null | 10920 | -245.4321136 | -0.09477887  | Yes |
| row_153 | Rpsa    | null | null | 10945 | -261.1583557 | -0.09124585  | Yes |
| row_154 | Rpl7    | null | null | 10948 | -263.0768433 | -0.08574311  | Yes |
| row_155 | Rps14   | null | null | 10969 | -279.6862183 | -0.08185196  | Yes |
| row_156 | Rps5    | null | null | 10993 | -295.9665527 | -0.07822941  | Yes |
| row_157 | Rps3a1  | null | null | 11014 | -318.17099   | -0.074338265 | Yes |
| row_158 | Mrpl42  | null | null | 11017 | -321.1486816 | -0.06883551  | Yes |
| row_159 | Rps19   | null | null | 11024 | -326.9820251 | -0.06369089  | Yes |
| row_160 | Mrpl22  | null | null | 11042 | -341.1478577 | -0.059531145 | Yes |
| row_161 | Ndufa7  | null | null | 11061 | -366.0018311 | -0.05546093  | Yes |
| row_162 | Rpl31   | null | null | 11082 | -382.4345703 | -0.051569782 | Yes |
| row_163 | Rps27   | null | null | 11100 | -405.5938416 | -0.047410034 | Yes |
| row_164 | mt-Rnr2 | null | null | 11107 | -413.6788635 | -0.04226542  | Yes |
| row_165 | Rps26   | null | null | 11142 | -469.5862122 | -0.03962774  | Yes |
| row_166 | Mrpl30  | null | null | 11147 | -485.053894  | -0.034304056 | Yes |
| row_167 | Rpl22l1 | null | null | 11148 | -487.1173401 | -0.028622236 | Yes |
| row_168 | mt-Rnr1 | null | null | 11155 | -509.6646729 | -0.02347762  | Yes |
| row_169 | Mrpl13  | null | null | 11158 | -511.0132446 | -0.017974868 | Yes |
| row_170 | Mrpl52  | null | null | 11173 | -546.9841919 | -0.01354652  | Yes |
| row_171 | Rps29   | null | null | 11182 | -583.5073853 | -0.00858097  | Yes |
| row_172 | Mrpl48  | null | null | 11190 | -613.0897827 | -0.003525886 | Yes |
| row_173 | Mrpl36  | null | null | 11231 | -811.0979004 | -0.001425409 | Yes |
| row_174 | Mrpl1   | null | null | 11233 | -831.3317261 | 0.004166876  | Yes |
| row_175 | Mrps22  | null | null | 11326 | -6304.582031 | 0.00161161   | Yes |

**Humanised mutant FUS drives progressive motor neuron degeneration without aggregation in 'FUSDelta14' knockin mice**  
**Devoy et al. 2017**

**Supplementary Table 6** Gene Set Enrichment Analysis (GSEA) **Large ribosomal subunit** - list of genes dysregulated at 12 months of age in FUS Delta14 sp

| NAME   | PROBE         | GENE SYMBOL | GENE_TITLE | RANK IN GENE LIST | RANK METRIC SCORE | RUNNING ES  | CORE ENRICHMENT |
|--------|---------------|-------------|------------|-------------------|-------------------|-------------|-----------------|
| row_0  | Nsun4         | null        | null       | 2063              | 12.55372238       | -0.17145021 | No              |
| row_1  | Gemin5        | null        | null       | 2095              | 12.22449017       | -0.16243862 | No              |
| row_2  | Surf6         | null        | null       | 4154              | 2.883627653       | -0.33344477 | No              |
| row_3  | Mrpl4         | null        | null       | 4233              | 2.762340069       | -0.32860723 | No              |
| row_4  | Mrpl38        | null        | null       | 4526              | 2.314575672       | -0.34277505 | No              |
| row_5  | Mrpl45        | null        | null       | 5758              | 1.177889824       | -0.4403354  | No              |
| row_6  | Mrpl37        | null        | null       | 5908              | 1.105024099       | -0.44180337 | No              |
| row_7  | Mrpl44        | null        | null       | 6398              | -1.143575311      | -0.47346672 | No              |
| row_8  | Mpv17l2       | null        | null       | 6543              | -1.227466464      | -0.47449064 | No              |
| row_9  | Mrpl10        | null        | null       | 6750              | -1.36965251       | -0.48102078 | No              |
| row_10 | Mrpl43        | null        | null       | 6913              | -1.524495244      | -0.4836433  | No              |
| row_11 | Mrpl28        | null        | null       | 6929              | -1.549821138      | -0.47321072 | No              |
| row_12 | Mrpl49        | null        | null       | 7286              | -2.00241971       | -0.49306238 | No              |
| row_13 | Mrpl2         | null        | null       | 7421              | -2.225229502      | -0.4931982  | No              |
| row_14 | Mrpl3         | null        | null       | 7668              | -2.72729826       | -0.50328076 | No              |
| row_15 | Mrpl19        | null        | null       | 7721              | -2.858035564      | -0.49613413 | No              |
| row_16 | Mrpl9         | null        | null       | 8043              | -3.780286789      | -0.5128774  | No              |
| row_17 | Mrpl34        | null        | null       | 8181              | -4.340406895      | -0.5132797  | No              |
| row_18 | Zfp622        | null        | null       | 8297              | -4.947680473      | -0.5117281  | No              |
| row_19 | Mrpl16        | null        | null       | 8337              | -5.149276733      | -0.503427   | No              |
| row_20 | 2810006K23Rik | null        | null       | 8469              | -5.951928139      | -0.5032964  | No              |
| row_21 | Mrpl14        | null        | null       | 8821              | -8.893301964      | -0.522704   | No              |
| row_22 | Rpl7l1        | null        | null       | 9229              | -14.61259651      | -0.5470849  | No              |
| row_23 | Rplp0         | null        | null       | 9472              | -19.87993813      | -0.5568122  | Yes             |
| row_24 | Mrpl55        | null        | null       | 9547              | -22.21569252      | -0.55161947 | Yes             |
| row_25 | Rpl27         | null        | null       | 9637              | -25.04844666      | -0.5477588  | Yes             |
| row_26 | Nsun3         | null        | null       | 9696              | -27.04464722      | -0.5411451  | Yes             |
| row_27 | Zcchc17       | null        | null       | 9710              | -27.51429367      | -0.5305349  | Yes             |
| row_28 | Mrpl39        | null        | null       | 9766              | -29.67875099      | -0.52365476 | Yes             |
| row_29 | Rpl8          | null        | null       | 9877              | -34.74137497      | -0.52165914 | Yes             |
| row_30 | Mrpl17        | null        | null       | 9948              | -38.69493866      | -0.51611114 | Yes             |
| row_31 | Mrpl46        | null        | null       | 9972              | -40.10016251      | -0.5063891  | Yes             |
| row_32 | Rpl4          | null        | null       | 10000             | -41.64800644      | -0.49702224 | Yes             |
| row_33 | Mrpl23        | null        | null       | 10021             | -43.24662781      | -0.48703372 | Yes             |
| row_34 | Mrpl15        | null        | null       | 10165             | -54.14429855      | -0.48796883 | Yes             |
| row_35 | Mrpl40        | null        | null       | 10166             | -54.17938995      | -0.47620413 | Yes             |
| row_36 | Mterf4        | null        | null       | 10187             | -56.06287766      | -0.46621564 | Yes             |
| row_37 | Mrpl21        | null        | null       | 10188             | -56.15470123      | -0.45445094 | Yes             |
| row_38 | Rpl36         | null        | null       | 10253             | -63.1675148       | -0.44837007 | Yes             |
| row_39 | Rpl28         | null        | null       | 10265             | -64.4839859       | -0.43758225 | Yes             |
| row_40 | Rpl22         | null        | null       | 10300             | -69.77206421      | -0.4288371  | Yes             |
| row_41 | Rpl18         | null        | null       | 10353             | -75.43097687      | -0.4216905  | Yes             |
| row_42 | Mrpl20        | null        | null       | 10377             | -78.18450928      | -0.41196844 | Yes             |
| row_43 | Rpl35a        | null        | null       | 10381             | -78.56951141      | -0.40047014 | Yes             |
| row_44 | Rpl10a        | null        | null       | 10385             | -78.81176758      | -0.38897187 | Yes             |
| row_45 | Rpl14         | null        | null       | 10434             | -85.91460419      | -0.38147005 | Yes             |
| row_46 | Mrpl32        | null        | null       | 10459             | -91.17756653      | -0.37183678 | Yes             |
| row_47 | Mrpl11        | null        | null       | 10461             | -91.59705353      | -0.3601609  | Yes             |
| row_48 | Mrpl35        | null        | null       | 10471             | -93.95879364      | -0.34919545 | Yes             |
| row_49 | Mrpl50        | null        | null       | 10512             | -99.57808685      | -0.34098315 | Yes             |
| row_50 | Rpl17         | null        | null       | 10527             | -101.6408234      | -0.3304618  | Yes             |
| row_51 | Mrpl41        | null        | null       | 10549             | -105.0257263      | -0.3205621  | Yes             |
| row_52 | Rpl15         | null        | null       | 10565             | -107.3610916      | -0.31012952 | Yes             |
| row_53 | Rpl9          | null        | null       | 10583             | -113.0406189      | -0.2998746  | Yes             |
| row_54 | Rpl37a        | null        | null       | 10595             | -115.9348679      | -0.2890868  | Yes             |
| row_55 | Mrpl27        | null        | null       | 10604             | -117.6448135      | -0.27803257 | Yes             |
| row_56 | Mrpl12        | null        | null       | 10623             | -122.7796249      | -0.26786646 | Yes             |
| row_57 | Npm1          | null        | null       | 10698             | -142.3594055      | -0.26267368 | Yes             |
| row_58 | Rpl38         | null        | null       | 10710             | -146.3634949      | -0.2518859  | Yes             |
| row_59 | Rpl34         | null        | null       | 10718             | -148.569458       | -0.24074285 | Yes             |

|        |         |      |      |       |              |              |     |
|--------|---------|------|------|-------|--------------|--------------|-----|
| row_60 | Rps12   | null | null | 10721 | -150.4437408 | -0.22915576  | Yes |
| row_61 | Rpl26   | null | null | 10725 | -151.5032654 | -0.21765748  | Yes |
| row_62 | Rpl35   | null | null | 10727 | -151.7383575 | -0.20598158  | Yes |
| row_63 | Rpl23   | null | null | 10762 | -162.8869324 | -0.19723642  | Yes |
| row_64 | Rplp1   | null | null | 10771 | -166.6326599 | -0.18618219  | Yes |
| row_65 | Mrpl24  | null | null | 10786 | -171.3456726 | -0.17566082  | Yes |
| row_66 | Mrpl18  | null | null | 10794 | -175.7474976 | -0.16451779  | Yes |
| row_67 | Rpl11   | null | null | 10807 | -179.357605  | -0.1538188   | Yes |
| row_68 | Rpl29   | null | null | 10819 | -183.9489899 | -0.143031    | Yes |
| row_69 | Rpl37   | null | null | 10851 | -206.2558441 | -0.1340194   | Yes |
| row_70 | Mrpl54  | null | null | 10882 | -220.9447937 | -0.124919    | Yes |
| row_71 | Rpl18a  | null | null | 10891 | -225.9889374 | -0.11386477  | Yes |
| row_72 | Mrpl47  | null | null | 10898 | -228.3879852 | -0.102632925 | Yes |
| row_73 | Rpl7    | null | null | 10948 | -263.0768433 | -0.09521991  | Yes |
| row_74 | Mrpl42  | null | null | 11017 | -321.1486816 | -0.08949428  | Yes |
| row_75 | Mrpl22  | null | null | 11042 | -341.1478577 | -0.07986101  | Yes |
| row_76 | Rpl31   | null | null | 11082 | -382.4345703 | -0.07155989  | Yes |
| row_77 | mt-Rnr2 | null | null | 11107 | -413.6788635 | -0.061926626 | Yes |
| row_78 | Mrpl30  | null | null | 11147 | -485.053894  | -0.053625505 | Yes |
| row_79 | Rpl2211 | null | null | 11148 | -487.1173401 | -0.0418608   | Yes |
| row_80 | Mrpl13  | null | null | 11158 | -511.0132446 | -0.030895384 | Yes |
| row_81 | Mrpl52  | null | null | 11173 | -546.9841919 | -0.020374017 | Yes |
| row_82 | Mrpl48  | null | null | 11190 | -613.0897827 | -0.01003027  | Yes |
| row_83 | Mrpl36  | null | null | 11231 | -811.0979004 | -0.001817962 | Yes |
| row_84 | Mrpl1   | null | null | 11233 | -831.3317261 | 0.009857935  | Yes |

inal cord.

**Humanised mutant FUS drives progressive motor neuron degeneration without aggregation in 'FUSDelta14' knockin mice**  
**Devoy et al. 2017**

**Supplementary Table 7** Gene Set Enrichment Analysis (GSEA) **Mitochondrion** - list of genes dysregulated at 12 months of age in FUS Delta14 spinal cord.

| NAME   | PROBE         | GENE SYMBOL | GENE_TITLE | RANK IN GENE LIST | RANK METRIC SCORE | RUNNING ES   | CORE ENRICHMENT |
|--------|---------------|-------------|------------|-------------------|-------------------|--------------|-----------------|
| row_0  | Tgm2          | null        | null       | 1                 | 30555.05859       | 6.56E-04     | No              |
| row_1  | Gramd4        | null        | null       | 27                | 885.7765503       | -0.001082577 | No              |
| row_2  | Smurf1        | null        | null       | 31                | 848.8059692       | -6.26E-04    | No              |
| row_3  | Me2           | null        | null       | 33                | 714.2062988       | 3.00E-05     | No              |
| row_4  | Aldh18a1      | null        | null       | 73                | 351.8300171       | -0.003105564 | No              |
| row_5  | Tnfrsf1a      | null        | null       | 75                | 341.1329956       | -0.002449486 | No              |
| row_6  | Ilf3          | null        | null       | 129               | 200.5873413       | -0.006981994 | No              |
| row_7  | Ptcd1         | null        | null       | 142               | 188.5109711       | -0.007423502 | No              |
| row_8  | Slc8a2        | null        | null       | 156               | 176.8764343       | -0.00796479  | No              |
| row_9  | Tap1          | null        | null       | 211               | 138.2415009       | -0.012597078 | No              |
| row_10 | Acox3         | null        | null       | 268               | 114.7536926       | -0.017428927 | No              |
| row_11 | Adsl          | null        | null       | 289               | 109.3579407       | -0.01866868  | No              |
| row_12 | Prkca         | null        | null       | 332               | 94.74576569       | -0.022103602 | No              |
| row_13 | H6pd          | null        | null       | 340               | 92.17034149       | -0.022046207 | No              |
| row_14 | Acaca         | null        | null       | 346               | 90.62123108       | -0.02178925  | No              |
| row_15 | Pla2g15       | null        | null       | 380               | 81.20423889       | -0.02432615  | No              |
| row_16 | Srgap2        | null        | null       | 408               | 75.19145966       | -0.026264364 | No              |
| row_17 | Ambra1        | null        | null       | 416               | 74.48309326       | -0.02620697  | No              |
| row_18 | Mavs          | null        | null       | 434               | 71.58919525       | -0.02714738  | No              |
| row_19 | Slc11a2       | null        | null       | 474               | 65.73648071       | -0.030282961 | No              |
| row_20 | Pnkd          | null        | null       | 476               | 65.36031342       | -0.029626884 | No              |
| row_21 | Hap1          | null        | null       | 495               | 61.59661865       | -0.030667074 | No              |
| row_22 | Ago2          | null        | null       | 506               | 60.78369904       | -0.03090902  | No              |
| row_23 | Atad3a        | null        | null       | 523               | 59.092659         | -0.03174965  | No              |
| row_24 | Cds2          | null        | null       | 534               | 57.90937805       | -0.031991597 | No              |
| row_25 | Prkcd         | null        | null       | 567               | 54.89591217       | -0.034428716 | No              |
| row_26 | Lrrk1         | null        | null       | 577               | 53.73189545       | -0.03457088  | No              |
| row_27 | Akap1         | null        | null       | 609               | 50.97730255       | -0.03690822  | No              |
| row_28 | Slc8b1        | null        | null       | 614               | 50.38896561       | -0.036551483 | No              |
| row_29 | Kcnma1        | null        | null       | 620               | 50.07435226       | -0.036294527 | No              |
| row_30 | Nptx1         | null        | null       | 636               | 48.59153748       | -0.037035376 | No              |
| row_31 | Tchp          | null        | null       | 663               | 46.55474854       | -0.03887381  | No              |
| row_32 | Gsk3b         | null        | null       | 674               | 45.43483734       | -0.039115757 | No              |
| row_33 | Acox1         | null        | null       | 675               | 45.42578506       | -0.0383599   | No              |
| row_34 | Bcl2l13       | null        | null       | 689               | 44.94870758       | -0.038901187 | No              |
| row_35 | Tnrc18        | null        | null       | 712               | 43.39552307       | -0.0403405   | No              |
| row_36 | Fndc1         | null        | null       | 734               | 42.10077286       | -0.041680034 | No              |
| row_37 | Dnm1          | null        | null       | 737               | 41.86163712       | -0.041123737 | No              |
| row_38 | Vat1          | null        | null       | 746               | 41.18077087       | -0.041166123 | No              |
| row_39 | Srebf2        | null        | null       | 748               | 41.1349144        | -0.040510044 | No              |
| row_40 | 1110008L16Rik | null        | null       | 767               | 40.52392197       | -0.041550238 | No              |
| row_41 | Tmem8b        | null        | null       | 769               | 40.41680145       | -0.04089416  | No              |
| row_42 | Afg3l2        | null        | null       | 776               | 39.98567581       | -0.040736984 | No              |
| row_43 | Fasn          | null        | null       | 781               | 39.38042831       | -0.040380247 | No              |
| row_44 | Psen2         | null        | null       | 791               | 38.98199844       | -0.040522415 | No              |
| row_45 | Src           | null        | null       | 792               | 38.97668076       | -0.039766558 | No              |
| row_46 | Zmiz2         | null        | null       | 812               | 37.18345261       | -0.040906526 | No              |
| row_47 | Ctsa          | null        | null       | 845               | 35.89429855       | -0.043343645 | No              |
| row_48 | Wasf1         | null        | null       | 868               | 34.91271973       | -0.04478296  | No              |
| row_49 | Mthfd1        | null        | null       | 878               | 34.52032471       | -0.044925123 | No              |
| row_50 | Ogdh          | null        | null       | 882               | 34.38605499       | -0.044468608 | No              |
| row_51 | Vps13c        | null        | null       | 883               | 34.32542801       | -0.04371275  | No              |
| row_52 | Dhx29         | null        | null       | 885               | 34.30755234       | -0.04305667  | No              |
| row_53 | Herc2         | null        | null       | 911               | 33.40600586       | -0.044795327 | No              |
| row_54 | Mmp2          | null        | null       | 912               | 33.39179993       | -0.04403947  | No              |
| row_55 | Aco1          | null        | null       | 917               | 33.28639221       | -0.04368273  | No              |
| row_56 | Nol6          | null        | null       | 919               | 33.26008987       | -0.043026656 | No              |
| row_57 | Hk1           | null        | null       | 950               | 31.99718094       | -0.04526421  | No              |
| row_58 | Zdhhc8        | null        | null       | 961               | 31.75670624       | -0.045506157 | No              |
| row_59 | Nt5dc3        | null        | null       | 977               | 31.27624893       | -0.04624701  | No              |
| row_60 | Mars          | null        | null       | 982               | 30.92882156       | -0.04589027  | No              |
| row_61 | Abat          | null        | null       | 986               | 30.82634735       | -0.045433756 | No              |



|         |          |      |      |      |             |              |    |
|---------|----------|------|------|------|-------------|--------------|----|
| row_62  | Slit3    | null | null | 1001 | 30.14528084 | -0.046074823 | No |
| row_63  | Nos1     | null | null | 1026 | 29.58099365 | -0.047713697 | No |
| row_64  | Lrp5     | null | null | 1059 | 28.51641846 | -0.050150815 | No |
| row_65  | Bri3bp   | null | null | 1095 | 27.79366302 | -0.052887276 | No |
| row_66  | Mapk10   | null | null | 1097 | 27.68331718 | -0.052231196 | No |
| row_67  | Acacb    | null | null | 1122 | 27.01604843 | -0.05387007  | No |
| row_68  | Eln      | null | null | 1133 | 26.81711578 | -0.054112017 | No |
| row_69  | Snd1     | null | null | 1142 | 26.66940117 | -0.054154404 | No |
| row_70  | Nfkb1    | null | null | 1160 | 26.14028549 | -0.055094812 | No |
| row_71  | Sars2    | null | null | 1192 | 25.4682312  | -0.057432152 | No |
| row_72  | Atg13    | null | null | 1202 | 25.24794197 | -0.057574317 | No |
| row_73  | Sardh    | null | null | 1210 | 25.12393951 | -0.05751692  | No |
| row_74  | Trak1    | null | null | 1228 | 24.87200928 | -0.058457334 | No |
| row_75  | Raf1     | null | null | 1237 | 24.67622185 | -0.05849972  | No |
| row_76  | Heatr1   | null | null | 1241 | 24.64696312 | -0.0580432   | No |
| row_77  | Lpin1    | null | null | 1254 | 24.37413216 | -0.05848471  | No |
| row_78  | Mfn2     | null | null | 1257 | 24.32611847 | -0.057928413 | No |
| row_79  | Mrps2    | null | null | 1259 | 24.30971718 | -0.057272337 | No |
| row_80  | Hsdl1    | null | null | 1263 | 24.21035767 | -0.056815818 | No |
| row_81  | Hjurp    | null | null | 1277 | 23.73453903 | -0.057357106 | No |
| row_82  | Rai1     | null | null | 1286 | 23.56643867 | -0.057399493 | No |
| row_83  | Camk2a   | null | null | 1291 | 23.41599274 | -0.05704276  | No |
| row_84  | Hivep1   | null | null | 1292 | 23.38706017 | -0.0562869   | No |
| row_85  | Arzb     | null | null | 1308 | 23.10136414 | -0.05702775  | No |
| row_86  | Tars2    | null | null | 1318 | 22.91293907 | -0.057169914 | No |
| row_87  | Atcay    | null | null | 1360 | 22.24528694 | -0.06050506  | No |
| row_88  | Sirt5    | null | null | 1364 | 22.21564484 | -0.06004854  | No |
| row_89  | Gtf3c4   | null | null | 1379 | 21.81399536 | -0.06068961  | No |
| row_90  | Elac2    | null | null | 1405 | 21.40831947 | -0.062428262 | No |
| row_91  | Grn      | null | null | 1409 | 21.33284378 | -0.061971746 | No |
| row_92  | Stxbp1   | null | null | 1418 | 21.12141609 | -0.062014133 | No |
| row_93  | Gbf1     | null | null | 1430 | 20.78752518 | -0.06235586  | No |
| row_94  | Synj2    | null | null | 1456 | 20.35732269 | -0.06409451  | No |
| row_95  | Nos3     | null | null | 1460 | 20.31061554 | -0.063638    | No |
| row_96  | Alas1    | null | null | 1462 | 20.29590797 | -0.06298192  | No |
| row_97  | Mtor     | null | null | 1474 | 20.091465   | -0.06332365  | No |
| row_98  | Lig1     | null | null | 1481 | 19.99988365 | -0.06316648  | No |
| row_99  | Dnm2     | null | null | 1488 | 19.91637421 | -0.0630093   | No |
| row_100 | Cpt1a    | null | null | 1491 | 19.80084038 | -0.062453    | No |
| row_101 | Slc25a35 | null | null | 1496 | 19.76806641 | -0.062096264 | No |
| row_102 | Slc8a3   | null | null | 1501 | 19.70778465 | -0.06173953  | No |
| row_103 | Chpf     | null | null | 1527 | 19.11482048 | -0.06347819  | No |
| row_104 | Abcc8    | null | null | 1541 | 18.91813087 | -0.06401947  | No |
| row_105 | Eefsec   | null | null | 1543 | 18.88107872 | -0.063363396 | No |
| row_106 | Pcx      | null | null | 1550 | 18.76885033 | -0.06320622  | No |
| row_107 | Slc25a22 | null | null | 1619 | 17.6996994  | -0.06923544  | No |
| row_108 | Stat3    | null | null | 1629 | 17.52118874 | -0.0693776   | No |
| row_109 | Por      | null | null | 1656 | 17.13784981 | -0.07121603  | No |
| row_110 | Pop1     | null | null | 1659 | 17.11472893 | -0.07065974  | No |
| row_111 | Prkce    | null | null | 1732 | 16.1432209  | -0.07708807  | No |
| row_112 | Hlcs     | null | null | 1745 | 15.97098351 | -0.07752958  | No |
| row_113 | Cerk     | null | null | 1757 | 15.80545139 | -0.07787131  | No |
| row_114 | Aars2    | null | null | 1758 | 15.80330276 | -0.077115454 | No |
| row_115 | Tomm34   | null | null | 1760 | 15.7971344  | -0.07645938  | No |
| row_116 | Jarid2   | null | null | 1767 | 15.71577835 | -0.0763022   | No |
| row_117 | Spns1    | null | null | 1777 | 15.60892487 | -0.076444365 | No |
| row_118 | Letm1    | null | null | 1778 | 15.59956074 | -0.07568851  | No |
| row_119 | Abcg1    | null | null | 1788 | 15.46698666 | -0.075830676 | No |
| row_120 | Atic     | null | null | 1795 | 15.38154316 | -0.0756735   | No |
| row_121 | Dhx32    | null | null | 1801 | 15.32862186 | -0.07541654  | No |
| row_122 | Thop1    | null | null | 1805 | 15.26246834 | -0.07496003  | No |
| row_123 | Kank2    | null | null | 1815 | 15.14765263 | -0.075102195 | No |
| row_124 | Nnt      | null | null | 1818 | 15.13646603 | -0.0745459   | No |
| row_125 | Sox10    | null | null | 1825 | 15.05711555 | -0.07438872  | No |
| row_126 | Kcnj11   | null | null | 1827 | 15.03812504 | -0.073732644 | No |
| row_127 | Vwa8     | null | null | 1830 | 14.9704361  | -0.07317635  | No |
| row_128 | Gtpbp3   | null | null | 1871 | 14.61792278 | -0.07641171  | No |

|         |          |      |      |      |             |              |    |
|---------|----------|------|------|------|-------------|--------------|----|
| row_129 | Hs1bp3   | null | null | 1875 | 14.53185177 | -0.07595519  | No |
| row_130 | Dcaf5    | null | null | 1905 | 14.16957188 | -0.07809297  | No |
| row_131 | Mrm1     | null | null | 1910 | 14.08028889 | -0.077736236 | No |
| row_132 | Trub1    | null | null | 1946 | 13.7241745  | -0.08047269  | No |
| row_133 | Fyn      | null | null | 1956 | 13.64822292 | -0.08061486  | No |
| row_134 | Nacc2    | null | null | 1971 | 13.5198288  | -0.08125593  | No |
| row_135 | Txnrd1   | null | null | 1987 | 13.36809254 | -0.081996776 | No |
| row_136 | Pdpr     | null | null | 2000 | 13.24549294 | -0.08243828  | No |
| row_137 | Pacs2    | null | null | 2001 | 13.2157011  | -0.08168243  | No |
| row_138 | Psen1    | null | null | 2036 | 12.87554932 | -0.08431911  | No |
| row_139 | Gad1     | null | null | 2048 | 12.7449131  | -0.084660836 | No |
| row_140 | Nsun4    | null | null | 2063 | 12.55372238 | -0.0853019   | No |
| row_141 | Coq8a    | null | null | 2078 | 12.3939724  | -0.08594297  | No |
| row_142 | Pitrm1   | null | null | 2099 | 12.19889641 | -0.08718272  | No |
| row_143 | Pdk2     | null | null | 2107 | 12.11560631 | -0.08712532  | No |
| row_144 | Nlrx1    | null | null | 2108 | 12.10990238 | -0.08636947  | No |
| row_145 | Nat8l    | null | null | 2140 | 11.88866329 | -0.08870681  | No |
| row_146 | Cat      | null | null | 2156 | 11.77019882 | -0.089447655 | No |
| row_147 | Mlxip    | null | null | 2159 | 11.76479816 | -0.08889136  | No |
| row_148 | Abcf2    | null | null | 2165 | 11.71659088 | -0.0886344   | No |
| row_149 | Bcl2l11  | null | null | 2175 | 11.55470085 | -0.08877657  | No |
| row_150 | Efh1     | null | null | 2177 | 11.52617168 | -0.08812049  | No |
| row_151 | Pdp2     | null | null | 2189 | 11.43609905 | -0.08846222  | No |
| row_152 | Dnajc5   | null | null | 2207 | 11.24533939 | -0.08940263  | No |
| row_153 | Cry2     | null | null | 2211 | 11.20897484 | -0.08894611  | No |
| row_154 | Acsl1    | null | null | 2212 | 11.19427395 | -0.08819026  | No |
| row_155 | Aldh2    | null | null | 2215 | 11.15061951 | -0.08763396  | No |
| row_156 | Dnajc11  | null | null | 2261 | 10.69070911 | -0.09136822  | No |
| row_157 | Spg7     | null | null | 2273 | 10.5933857  | -0.09170995  | No |
| row_158 | Snph     | null | null | 2280 | 10.55253887 | -0.09155277  | No |
| row_159 | Slc25a25 | null | null | 2288 | 10.46755219 | -0.09149538  | No |
| row_160 | Tigar    | null | null | 2302 | 10.32269001 | -0.09203667  | No |
| row_161 | Fahd2a   | null | null | 2310 | 10.2719183  | -0.09197927  | No |
| row_162 | Prkaca   | null | null | 2312 | 10.25896931 | -0.0913232   | No |
| row_163 | Ivd      | null | null | 2322 | 10.19625473 | -0.09146536  | No |
| row_164 | Ide      | null | null | 2328 | 10.12988567 | -0.091208406 | No |
| row_165 | Ass1     | null | null | 2329 | 10.12852764 | -0.09045255  | No |
| row_166 | Lrrk2    | null | null | 2339 | 10.0526638  | -0.09059472  | No |
| row_167 | Ccar2    | null | null | 2340 | 10.04743385 | -0.089838855 | No |
| row_168 | Sptlc2   | null | null | 2348 | 9.992437363 | -0.08978146  | No |
| row_169 | Pi4k2a   | null | null | 2350 | 9.987475395 | -0.08912539  | No |
| row_170 | Dcakd    | null | null | 2355 | 9.964668274 | -0.08876865  | No |
| row_171 | Vars     | null | null | 2358 | 9.947878838 | -0.088212356 | No |
| row_172 | Psap     | null | null | 2359 | 9.945831299 | -0.087456495 | No |
| row_173 | Kif1b    | null | null | 2383 | 9.778719902 | -0.08899559  | No |
| row_174 | Acad10   | null | null | 2384 | 9.778583527 | -0.08823973  | No |
| row_175 | Ddah1    | null | null | 2410 | 9.573734283 | -0.08997838  | No |
| row_176 | Elk3     | null | null | 2417 | 9.561273575 | -0.08982121  | No |
| row_177 | Foxo3    | null | null | 2427 | 9.478625298 | -0.08996338  | No |
| row_178 | Gpam     | null | null | 2452 | 9.280852318 | -0.09160225  | No |
| row_179 | Mrs2     | null | null | 2476 | 9.17769146  | -0.09314134  | No |
| row_180 | Mmab     | null | null | 2491 | 9.063270569 | -0.09378241  | No |
| row_181 | Crat     | null | null | 2492 | 9.004062653 | -0.093026556 | No |
| row_182 | Pmpca    | null | null | 2525 | 8.722874641 | -0.09546367  | No |
| row_183 | Zfp13    | null | null | 2538 | 8.658646584 | -0.09590518  | No |
| row_184 | Pi4kb    | null | null | 2574 | 8.449771881 | -0.09864164  | No |
| row_185 | Ern1     | null | null | 2585 | 8.384327888 | -0.098883584 | No |
| row_186 | Wdr81    | null | null | 2595 | 8.287446976 | -0.09902575  | No |
| row_187 | Asah2    | null | null | 2610 | 8.202823639 | -0.09966682  | No |
| row_188 | Shc1     | null | null | 2612 | 8.188264847 | -0.09901074  | No |
| row_189 | Ldhd     | null | null | 2614 | 8.171419144 | -0.09835467  | No |
| row_190 | Zfhx3    | null | null | 2615 | 8.164732933 | -0.097598806 | No |
| row_191 | Slc25a10 | null | null | 2621 | 8.128980637 | -0.09734185  | No |
| row_192 | Plscr3   | null | null | 2624 | 8.120078087 | -0.09678555  | No |
| row_193 | Acly     | null | null | 2625 | 8.108164787 | -0.0960297   | No |
| row_194 | Aldh7a1  | null | null | 2637 | 8.047185898 | -0.09637143  | No |
| row_195 | Tcirg1   | null | null | 2644 | 8.004177094 | -0.09621425  | No |

|         |          |      |      |      |             |              |    |
|---------|----------|------|------|------|-------------|--------------|----|
| row_196 | Phyhipl  | null | null | 2662 | 7.928709984 | -0.09715466  | No |
| row_197 | Cs       | null | null | 2667 | 7.903690815 | -0.09679792  | No |
| row_198 | Aldh9a1  | null | null | 2673 | 7.860301495 | -0.096540965 | No |
| row_199 | Slc25a42 | null | null | 2679 | 7.821308613 | -0.09628401  | No |
| row_200 | Hadha    | null | null | 2689 | 7.783488274 | -0.09642618  | No |
| row_201 | Stard7   | null | null | 2697 | 7.743124962 | -0.09636878  | No |
| row_202 | Spg20    | null | null | 2716 | 7.648876667 | -0.09740897  | No |
| row_203 | Sncb     | null | null | 2741 | 7.55259943  | -0.09904785  | No |
| row_204 | Trit1    | null | null | 2749 | 7.497159004 | -0.098990455 | No |
| row_205 | Usp30    | null | null | 2757 | 7.435054302 | -0.09893306  | No |
| row_206 | Mapk14   | null | null | 2786 | 7.293083191 | -0.10097106  | No |
| row_207 | Agap2    | null | null | 2795 | 7.226827621 | -0.101013444 | No |
| row_208 | Acsf3    | null | null | 2798 | 7.219959259 | -0.10045715  | No |
| row_209 | Rnf144b  | null | null | 2824 | 7.089013577 | -0.1021958   | No |
| row_210 | Myo19    | null | null | 2828 | 7.068799019 | -0.10173928  | No |
| row_211 | Mto1     | null | null | 2844 | 6.97027874  | -0.10248013  | No |
| row_212 | Tshz3    | null | null | 2849 | 6.945355892 | -0.102123395 | No |
| row_213 | Atp10d   | null | null | 2857 | 6.916809559 | -0.102066    | No |
| row_214 | Trap1    | null | null | 2858 | 6.909668446 | -0.10131014  | No |
| row_215 | Lonp1    | null | null | 2865 | 6.871529102 | -0.10115297  | No |
| row_216 | Agtpbp1  | null | null | 2903 | 6.70650053  | -0.10408899  | No |
| row_217 | Sh3bp5   | null | null | 2911 | 6.670181751 | -0.10403159  | No |
| row_218 | Th       | null | null | 2917 | 6.63672924  | -0.10377464  | No |
| row_219 | Aifm2    | null | null | 2919 | 6.632403374 | -0.10311856  | No |
| row_220 | Lrpprc   | null | null | 2921 | 6.619216919 | -0.102462485 | No |
| row_221 | Mecr     | null | null | 2934 | 6.556781769 | -0.10290399  | No |
| row_222 | Rpusd3   | null | null | 2935 | 6.556063652 | -0.10214813  | No |
| row_223 | Epha4    | null | null | 2937 | 6.547751427 | -0.101492055 | No |
| row_224 | Mthfd1l  | null | null | 2943 | 6.540843964 | -0.1012351   | No |
| row_225 | Fen1     | null | null | 2960 | 6.49056673  | -0.10207573  | No |
| row_226 | Xpc      | null | null | 2966 | 6.467611313 | -0.10181878  | No |
| row_227 | Oxa1l    | null | null | 2971 | 6.455383778 | -0.10146204  | No |
| row_228 | Xpnpep3  | null | null | 2975 | 6.428705692 | -0.101005524 | No |
| row_229 | Mdh2     | null | null | 2980 | 6.417682648 | -0.10064878  | No |
| row_230 | Tfap4    | null | null | 3017 | 6.232719898 | -0.103485025 | No |
| row_231 | Brd8     | null | null | 3019 | 6.214444637 | -0.10282895  | No |
| row_232 | Tmem143  | null | null | 3022 | 6.202355385 | -0.10227265  | No |
| row_233 | Dnajc27  | null | null | 3026 | 6.194260597 | -0.10181613  | No |
| row_234 | Fancg    | null | null | 3037 | 6.135654926 | -0.10205808  | No |
| row_235 | Mcu      | null | null | 3042 | 6.115357399 | -0.10170135  | No |
| row_236 | Abl1     | null | null | 3049 | 6.083391666 | -0.10154417  | No |
| row_237 | Bphl     | null | null | 3055 | 6.061126709 | -0.101287216 | No |
| row_238 | Slc25a44 | null | null | 3074 | 5.948134422 | -0.10232741  | No |
| row_239 | Mtfmt    | null | null | 3078 | 5.936202526 | -0.10187089  | No |
| row_240 | Gpd2     | null | null | 3101 | 5.844689846 | -0.103310205 | No |
| row_241 | Slc25a23 | null | null | 3125 | 5.735219002 | -0.104849294 | No |
| row_242 | Polg     | null | null | 3134 | 5.706501007 | -0.10489168  | No |
| row_243 | Rab11b   | null | null | 3136 | 5.701321602 | -0.104235604 | No |
| row_244 | Hsd17b4  | null | null | 3153 | 5.644258499 | -0.10507623  | No |
| row_245 | Parp9    | null | null | 3162 | 5.612594604 | -0.10511862  | No |
| row_246 | Cox15    | null | null | 3163 | 5.606339931 | -0.10436276  | No |
| row_247 | Txnrd2   | null | null | 3175 | 5.567015171 | -0.10470449  | No |
| row_248 | Dpysl2   | null | null | 3187 | 5.530966282 | -0.10504622  | No |
| row_249 | Sfxn2    | null | null | 3189 | 5.515417099 | -0.10439014  | No |
| row_250 | Aldh5a1  | null | null | 3196 | 5.481945992 | -0.10423297  | No |
| row_251 | Tpp1     | null | null | 3204 | 5.461959839 | -0.10417557  | No |
| row_252 | Ppif     | null | null | 3224 | 5.374773026 | -0.10531554  | No |
| row_253 | Tdrd7    | null | null | 3228 | 5.361707687 | -0.104859024 | No |
| row_254 | D2hgdh   | null | null | 3236 | 5.335103989 | -0.10480163  | No |
| row_255 | Hmgcs2   | null | null | 3240 | 5.303886414 | -0.10434511  | No |
| row_256 | Cry1     | null | null | 3252 | 5.268076897 | -0.10468684  | No |
| row_257 | Trp53    | null | null | 3255 | 5.257921696 | -0.104130544 | No |
| row_258 | Slc25a12 | null | null | 3264 | 5.231944561 | -0.10417293  | No |
| row_259 | Stard3   | null | null | 3273 | 5.203613758 | -0.10421532  | No |
| row_260 | Abcc9    | null | null | 3280 | 5.185572147 | -0.10405814  | No |
| row_261 | Dhx57    | null | null | 3285 | 5.167887688 | -0.103701405 | No |
| row_262 | Usp48    | null | null | 3289 | 5.144835949 | -0.103244886 | No |

|         |               |      |      |      |             |              |    |
|---------|---------------|------|------|------|-------------|--------------|----|
| row_263 | Gldc          | null | null | 3308 | 5.075715542 | -0.104285076 | No |
| row_264 | Mxd1          | null | null | 3318 | 5.009304047 | -0.10442725  | No |
| row_265 | Hsp90ab1      | null | null | 3365 | 4.84558773  | -0.10826129  | No |
| row_266 | Abcd3         | null | null | 3379 | 4.801146507 | -0.10880258  | No |
| row_267 | lqce          | null | null | 3387 | 4.786997318 | -0.10874518  | No |
| row_268 | Cpt1c         | null | null | 3388 | 4.775093079 | -0.107989326 | No |
| row_269 | Mrps5         | null | null | 3394 | 4.753861904 | -0.10773237  | No |
| row_270 | Serac1        | null | null | 3399 | 4.72367239  | -0.10737564  | No |
| row_271 | Adh1          | null | null | 3410 | 4.709075928 | -0.10761758  | No |
| row_272 | Msto1         | null | null | 3421 | 4.674862862 | -0.10785953  | No |
| row_273 | Thra          | null | null | 3438 | 4.621332645 | -0.108700156 | No |
| row_274 | Fads1         | null | null | 3442 | 4.606935978 | -0.108243644 | No |
| row_275 | Afg3l1        | null | null | 3447 | 4.584078312 | -0.1078869   | No |
| row_276 | Asl           | null | null | 3453 | 4.567703724 | -0.10762995  | No |
| row_277 | Nipsnap1      | null | null | 3463 | 4.533967018 | -0.10777212  | No |
| row_278 | Exog          | null | null | 3464 | 4.531827927 | -0.10701626  | No |
| row_279 | Sarm1         | null | null | 3469 | 4.523144722 | -0.106659524 | No |
| row_280 | Lig3          | null | null | 3474 | 4.497749329 | -0.10630278  | No |
| row_281 | Dmpk          | null | null | 3475 | 4.496816635 | -0.10554693  | No |
| row_282 | Chdh          | null | null | 3477 | 4.488336563 | -0.10489085  | No |
| row_283 | Acsf2         | null | null | 3480 | 4.471518993 | -0.104334556 | No |
| row_284 | Kif1bp        | null | null | 3490 | 4.449288845 | -0.10447672  | No |
| row_285 | Ctsb          | null | null | 3507 | 4.424388885 | -0.10531735  | No |
| row_286 | Nefh          | null | null | 3508 | 4.423994541 | -0.10456149  | No |
| row_287 | Pde2a         | null | null | 3516 | 4.400578022 | -0.1045041   | No |
| row_288 | Mief1         | null | null | 3519 | 4.39420414  | -0.1039478   | No |
| row_289 | Slc27a1       | null | null | 3536 | 4.313569069 | -0.10478843  | No |
| row_290 | Got2          | null | null | 3538 | 4.310852528 | -0.104132354 | No |
| row_291 | Sirt4         | null | null | 3540 | 4.303637505 | -0.10347628  | No |
| row_292 | 0610009O20Rik | null | null | 3542 | 4.301675797 | -0.102820195 | No |
| row_293 | Polrmt        | null | null | 3544 | 4.299694538 | -0.10216412  | No |
| row_294 | Mutyh         | null | null | 3555 | 4.252169609 | -0.10240607  | No |
| row_295 | Bdh1          | null | null | 3567 | 4.221230984 | -0.1027478   | No |
| row_296 | Clu           | null | null | 3578 | 4.201067924 | -0.10298974  | No |
| row_297 | Atp5sl        | null | null | 3594 | 4.17263937  | -0.10373059  | No |
| row_298 | Dcaf8         | null | null | 3595 | 4.170204639 | -0.102974735 | No |
| row_299 | Secisbp2      | null | null | 3597 | 4.166490555 | -0.10231866  | No |
| row_300 | Gabbr1        | null | null | 3629 | 4.085955143 | -0.104655996 | No |
| row_301 | Bckdha        | null | null | 3632 | 4.071686268 | -0.1040997   | No |
| row_302 | Aldh3a2       | null | null | 3636 | 4.063464642 | -0.10364318  | No |
| row_303 | Hspa9         | null | null | 3644 | 4.034802914 | -0.10358579  | No |
| row_304 | Rnasel        | null | null | 3645 | 4.025636673 | -0.102829926 | No |
| row_305 | Sdha          | null | null | 3649 | 4.021390915 | -0.102373414 | No |
| row_306 | Capn1         | null | null | 3660 | 4.000296593 | -0.10261536  | No |
| row_307 | Zbed5         | null | null | 3675 | 3.958540201 | -0.10325643  | No |
| row_308 | Ucp2          | null | null | 3681 | 3.944452286 | -0.10299947  | No |
| row_309 | Slc25a38      | null | null | 3709 | 3.84490633  | -0.10493769  | No |
| row_310 | Acsl5         | null | null | 3717 | 3.83062315  | -0.10488029  | No |
| row_311 | Stard5        | null | null | 3724 | 3.811373234 | -0.10472312  | No |
| row_312 | Sox4          | null | null | 3732 | 3.798035622 | -0.10466572  | No |
| row_313 | 9030617O03Rik | null | null | 3733 | 3.792416573 | -0.103909865 | No |
| row_314 | Pus1          | null | null | 3740 | 3.769305468 | -0.10375269  | No |
| row_315 | Casp9         | null | null | 3777 | 3.683356524 | -0.10658893  | No |
| row_316 | Aldh1l2       | null | null | 3779 | 3.678087473 | -0.105932854 | No |
| row_317 | Samm50        | null | null | 3783 | 3.670893431 | -0.105476335 | No |
| row_318 | Plcd1         | null | null | 3785 | 3.663417816 | -0.10482026  | No |
| row_319 | Mccc1         | null | null | 3792 | 3.653384447 | -0.10466308  | No |
| row_320 | Akt1          | null | null | 3794 | 3.652406454 | -0.104007006 | No |
| row_321 | Mrps27        | null | null | 3795 | 3.650242805 | -0.103251144 | No |
| row_322 | Htra2         | null | null | 3802 | 3.639060259 | -0.103093974 | No |
| row_323 | Rai14         | null | null | 3804 | 3.634070873 | -0.10243789  | No |
| row_324 | Mtus1         | null | null | 3814 | 3.616141319 | -0.10258006  | No |
| row_325 | Dna2          | null | null | 3823 | 3.595425129 | -0.10262245  | No |
| row_326 | Ptpn11        | null | null | 3825 | 3.592255116 | -0.101966366 | No |
| row_327 | 2310061I04Rik | null | null | 3840 | 3.551478624 | -0.10260744  | No |
| row_328 | Timm44        | null | null | 3845 | 3.543540001 | -0.1022507   | No |
| row_329 | Acat2         | null | null | 3857 | 3.525716305 | -0.10259243  | No |

|         |          |      |      |      |             |              |    |
|---------|----------|------|------|------|-------------|--------------|----|
| row_330 | Abcb8    | null | null | 3862 | 3.507148743 | -0.1022357   | No |
| row_331 | Drq2     | null | null | 3870 | 3.497701883 | -0.1021783   | No |
| row_332 | Letm2    | null | null | 3885 | 3.448040724 | -0.10281937  | No |
| row_333 | Dao      | null | null | 3890 | 3.435639143 | -0.102462634 | No |
| row_334 | Casp2    | null | null | 3891 | 3.430714369 | -0.10170677  | No |
| row_335 | Vars2    | null | null | 3896 | 3.422293186 | -0.10135004  | No |
| row_336 | Pkm      | null | null | 3917 | 3.371460199 | -0.10258979  | No |
| row_337 | Ogdhl    | null | null | 3922 | 3.365113974 | -0.10223305  | No |
| row_338 | Cltc     | null | null | 3924 | 3.358335495 | -0.10157698  | No |
| row_339 | Akap8    | null | null | 3946 | 3.298427105 | -0.10291651  | No |
| row_340 | Gls2     | null | null | 3951 | 3.282819033 | -0.102559775 | No |
| row_341 | Aifm3    | null | null | 3970 | 3.250430822 | -0.103599966 | No |
| row_342 | Nln      | null | null | 3983 | 3.23709631  | -0.10404147  | No |
| row_343 | Gars     | null | null | 3994 | 3.220311165 | -0.104283415 | No |
| row_344 | Dgat2    | null | null | 4002 | 3.205233097 | -0.10422602  | No |
| row_345 | Mmachc   | null | null | 4003 | 3.204890728 | -0.10347017  | No |
| row_346 | Atpaf1   | null | null | 4019 | 3.171010256 | -0.10421102  | No |
| row_347 | Ankzf1   | null | null | 4022 | 3.164656639 | -0.10365472  | No |
| row_348 | Acp6     | null | null | 4032 | 3.137387514 | -0.103796884 | No |
| row_349 | Cox18    | null | null | 4046 | 3.105129004 | -0.10433818  | No |
| row_350 | Dact2    | null | null | 4048 | 3.102981567 | -0.10368209  | No |
| row_351 | Dlst     | null | null | 4061 | 3.065677166 | -0.10412361  | No |
| row_352 | Rnaseh1  | null | null | 4095 | 3.002027512 | -0.1066605   | No |
| row_353 | Shmt2    | null | null | 4096 | 3.001744986 | -0.105904646 | No |
| row_354 | Ltbp1    | null | null | 4106 | 2.982506275 | -0.10604681  | No |
| row_355 | Acss1    | null | null | 4119 | 2.948084354 | -0.10648832  | No |
| row_356 | Sphkap   | null | null | 4130 | 2.923780918 | -0.10673027  | No |
| row_357 | Clic4    | null | null | 4142 | 2.910177708 | -0.107071996 | No |
| row_358 | Acot1    | null | null | 4171 | 2.850931406 | -0.10910999  | No |
| row_359 | Supv3l1  | null | null | 4195 | 2.821311712 | -0.11064908  | No |
| row_360 | Dnm3     | null | null | 4204 | 2.812295675 | -0.110691465 | No |
| row_361 | Cyb5r3   | null | null | 4221 | 2.777993917 | -0.1115321   | No |
| row_362 | Ywhaz    | null | null | 4225 | 2.771474361 | -0.11107558  | No |
| row_363 | Mrpl4    | null | null | 4233 | 2.762340069 | -0.11101819  | No |
| row_364 | Slc8a1   | null | null | 4246 | 2.743217707 | -0.111459695 | No |
| row_365 | Gcdh     | null | null | 4256 | 2.729022741 | -0.11160186  | No |
| row_366 | Cdk5rap1 | null | null | 4265 | 2.712977886 | -0.111644246 | No |
| row_367 | Prosc    | null | null | 4288 | 2.686755419 | -0.11308356  | No |
| row_368 | Txnrd3   | null | null | 4301 | 2.674651384 | -0.11352507  | No |
| row_369 | Ndrq4    | null | null | 4323 | 2.644342422 | -0.114864595 | No |
| row_370 | Ddit4    | null | null | 4324 | 2.642177343 | -0.11410874  | No |
| row_371 | Ncbp1    | null | null | 4335 | 2.628850222 | -0.11435069  | No |
| row_372 | Txnip    | null | null | 4337 | 2.623420954 | -0.11369461  | No |
| row_373 | Wars2    | null | null | 4349 | 2.590276957 | -0.11403634  | No |
| row_374 | Rab35    | null | null | 4352 | 2.582321644 | -0.11348004  | No |
| row_375 | Pccb     | null | null | 4356 | 2.579746723 | -0.11302353  | No |
| row_376 | Abca8a   | null | null | 4358 | 2.577151775 | -0.112367444 | No |
| row_377 | Opa3     | null | null | 4364 | 2.570951939 | -0.11211049  | No |
| row_378 | Nars     | null | null | 4390 | 2.530139685 | -0.11384915  | No |
| row_379 | Clpb     | null | null | 4413 | 2.486188412 | -0.11528846  | No |
| row_380 | Ndufv1   | null | null | 4416 | 2.484201193 | -0.11473216  | No |
| row_381 | Immt     | null | null | 4431 | 2.461073875 | -0.11537323  | No |
| row_382 | Gk5      | null | null | 4470 | 2.401633263 | -0.11840903  | No |
| row_383 | Azin2    | null | null | 4475 | 2.397264957 | -0.1180523   | No |
| row_384 | Tmem173  | null | null | 4482 | 2.391468525 | -0.11789512  | No |
| row_385 | Cox10    | null | null | 4497 | 2.367503643 | -0.11853619  | No |
| row_386 | Fastkd1  | null | null | 4498 | 2.365339279 | -0.11778033  | No |
| row_387 | Mrps18b  | null | null | 4504 | 2.353528023 | -0.11752337  | No |
| row_388 | Noa1     | null | null | 4511 | 2.341440678 | -0.1173662   | No |
| row_389 | Rbfa     | null | null | 4516 | 2.326744795 | -0.11700946  | No |
| row_390 | Sfxn3    | null | null | 4523 | 2.317281723 | -0.11685229  | No |
| row_391 | Mrpl38   | null | null | 4526 | 2.314575672 | -0.11629599  | No |
| row_392 | Ldhd     | null | null | 4527 | 2.311837673 | -0.11554013  | No |
| row_393 | Hars2    | null | null | 4528 | 2.311443329 | -0.11478428  | No |
| row_394 | Bckdk    | null | null | 4547 | 2.279392481 | -0.11582447  | No |
| row_395 | Dhodh    | null | null | 4553 | 2.27401948  | -0.11556751  | No |
| row_396 | Abca8b   | null | null | 4559 | 2.268688917 | -0.11531056  | No |

|         |               |      |      |      |             |              |    |
|---------|---------------|------|------|------|-------------|--------------|----|
| row_397 | Mapk9         | null | null | 4564 | 2.265136719 | -0.11495382  | No |
| row_398 | Uqcrcl1       | null | null | 4584 | 2.235046864 | -0.11609379  | No |
| row_399 | Bckdhhb       | null | null | 4589 | 2.23006773  | -0.11573706  | No |
| row_400 | Fam110b       | null | null | 4591 | 2.227714062 | -0.115080975 | No |
| row_401 | Bcat1         | null | null | 4604 | 2.207109928 | -0.11552249  | No |
| row_402 | Pck2          | null | null | 4628 | 2.182816744 | -0.11706158  | No |
| row_403 | Adck5         | null | null | 4638 | 2.167192221 | -0.11720374  | No |
| row_404 | Mul1          | null | null | 4640 | 2.163887501 | -0.11654767  | No |
| row_405 | Nrgn          | null | null | 4641 | 2.162825584 | -0.11579181  | No |
| row_406 | Aldoa         | null | null | 4648 | 2.149488688 | -0.115634635 | No |
| row_407 | Slc27a2       | null | null | 4650 | 2.148413181 | -0.11497856  | No |
| row_408 | Pla2g6        | null | null | 4665 | 2.128335238 | -0.11561963  | No |
| row_409 | Rab3d         | null | null | 4668 | 2.126123905 | -0.11506333  | No |
| row_410 | Rap1gds1      | null | null | 4670 | 2.12301445  | -0.11440725  | No |
| row_411 | Idh2          | null | null | 4676 | 2.118370771 | -0.11415029  | No |
| row_412 | Primpol       | null | null | 4683 | 2.097679615 | -0.11399312  | No |
| row_413 | Hmgcl         | null | null | 4686 | 2.089436054 | -0.113436826 | No |
| row_414 | Mccc2         | null | null | 4692 | 2.083467722 | -0.11317987  | No |
| row_415 | Stom          | null | null | 4714 | 2.066258669 | -0.1145194   | No |
| row_416 | Zfp202        | null | null | 4718 | 2.063120127 | -0.11406288  | No |
| row_417 | Idh3a         | null | null | 4727 | 2.050417185 | -0.11410527  | No |
| row_418 | Sirt2         | null | null | 4730 | 2.043070316 | -0.11354897  | No |
| row_419 | Acadvl        | null | null | 4738 | 2.027019978 | -0.11349158  | No |
| row_420 | Rtn4ip1       | null | null | 4754 | 2.014859438 | -0.11423243  | No |
| row_421 | Acot8         | null | null | 4759 | 2.007431984 | -0.113875695 | No |
| row_422 | Oat           | null | null | 4797 | 1.95788765  | -0.116811715 | No |
| row_423 | Ubiad1        | null | null | 4801 | 1.953627944 | -0.116355196 | No |
| row_424 | Tufm          | null | null | 4805 | 1.948068261 | -0.115898676 | No |
| row_425 | Taco1         | null | null | 4817 | 1.941556931 | -0.116240405 | No |
| row_426 | Agpat4        | null | null | 4821 | 1.9382056   | -0.11578389  | No |
| row_427 | 1810043G02Rik | null | null | 4829 | 1.933098078 | -0.11572649  | No |
| row_428 | Bak1          | null | null | 4836 | 1.927259088 | -0.11556932  | No |
| row_429 | Acad12        | null | null | 4846 | 1.91947639  | -0.11571149  | No |
| row_430 | Cd3eap        | null | null | 4849 | 1.917641163 | -0.11515519  | No |
| row_431 | Timm50        | null | null | 4854 | 1.9124403   | -0.11479846  | No |
| row_432 | Ears2         | null | null | 4862 | 1.907261252 | -0.11474106  | No |
| row_433 | Napg          | null | null | 4869 | 1.900616169 | -0.11458389  | No |
| row_434 | Wwox          | null | null | 4881 | 1.87975812  | -0.114925615 | No |
| row_435 | Rmnd1         | null | null | 4887 | 1.871801734 | -0.11466866  | No |
| row_436 | Gfm1          | null | null | 4910 | 1.841452718 | -0.11610797  | No |
| row_437 | Me3           | null | null | 4920 | 1.83217001  | -0.116250135 | No |
| row_438 | Cpt2          | null | null | 4929 | 1.820766926 | -0.11629252  | No |
| row_439 | Lipe          | null | null | 4936 | 1.806792021 | -0.116135344 | No |
| row_440 | Trim39        | null | null | 4970 | 1.770997286 | -0.118672244 | No |
| row_441 | Cyb5r1        | null | null | 4980 | 1.759034038 | -0.11881441  | No |
| row_442 | Cars2         | null | null | 4985 | 1.75614512  | -0.118457675 | No |
| row_443 | Fkbp4         | null | null | 4999 | 1.738030791 | -0.11899897  | No |
| row_444 | Rhbdd1        | null | null | 5009 | 1.726055264 | -0.11914113  | No |
| row_445 | Ogg1          | null | null | 5013 | 1.720508337 | -0.11868461  | No |
| row_446 | Tmbim6        | null | null | 5028 | 1.702496767 | -0.11932568  | No |
| row_447 | Agk           | null | null | 5029 | 1.702414751 | -0.11856982  | No |
| row_448 | Acadm         | null | null | 5041 | 1.695208192 | -0.11891155  | No |
| row_449 | Vdac1         | null | null | 5043 | 1.694457769 | -0.11825547  | No |
| row_450 | Pnkp          | null | null | 5046 | 1.693071127 | -0.117699176 | No |
| row_451 | Degs1         | null | null | 5072 | 1.666658759 | -0.11943783  | No |
| row_452 | Coq6          | null | null | 5090 | 1.646344066 | -0.12037824  | No |
| row_453 | Kyat3         | null | null | 5105 | 1.627786875 | -0.12101931  | No |
| row_454 | Pnpla7        | null | null | 5110 | 1.624467611 | -0.12066258  | No |
| row_455 | Casp8         | null | null | 5121 | 1.612777233 | -0.12090452  | No |
| row_456 | Ckb           | null | null | 5133 | 1.604647636 | -0.12124625  | No |
| row_457 | Bcat2         | null | null | 5137 | 1.601385355 | -0.12078973  | No |
| row_458 | Pdk4          | null | null | 5140 | 1.598991632 | -0.12023344  | No |
| row_459 | Ecsit         | null | null | 5153 | 1.592443705 | -0.120674945 | No |
| row_460 | Slc9b2        | null | null | 5159 | 1.587163091 | -0.12041799  | No |
| row_461 | Hspa2         | null | null | 5162 | 1.584339142 | -0.11986169  | No |
| row_462 | Mief2         | null | null | 5189 | 1.556150913 | -0.12170012  | No |
| row_463 | Mcl1          | null | null | 5202 | 1.548757911 | -0.12214164  | No |

|         |           |      |      |      |             |              |    |
|---------|-----------|------|------|------|-------------|--------------|----|
| row_464 | Msrb3     | null | null | 5223 | 1.531596661 | -0.12338138  | No |
| row_465 | Qrs1      | null | null | 5239 | 1.521166682 | -0.12412223  | No |
| row_466 | Rsad1     | null | null | 5241 | 1.52100265  | -0.12346616  | No |
| row_467 | Pgs1      | null | null | 5248 | 1.518357754 | -0.12330898  | No |
| row_468 | Rnf185    | null | null | 5249 | 1.517173171 | -0.122553125 | No |
| row_469 | Grsf1     | null | null | 5256 | 1.512559295 | -0.12239595  | No |
| row_470 | Tmem14c   | null | null | 5263 | 1.504982233 | -0.12223878  | No |
| row_471 | Hcls1     | null | null | 5264 | 1.503959656 | -0.121482916 | No |
| row_472 | Tk2       | null | null | 5270 | 1.497492433 | -0.12122596  | No |
| row_473 | Park2     | null | null | 5277 | 1.490501285 | -0.12106878  | No |
| row_474 | Etfdh     | null | null | 5287 | 1.479205132 | -0.121210955 | No |
| row_475 | Slc25a30  | null | null | 5303 | 1.464933157 | -0.1219518   | No |
| row_476 | Slc27a3   | null | null | 5332 | 1.446204662 | -0.1239898   | No |
| row_477 | Dhtkd1    | null | null | 5344 | 1.437472463 | -0.12433153  | No |
| row_478 | Hars      | null | null | 5347 | 1.435396194 | -0.12377523  | No |
| row_479 | Mmaa      | null | null | 5357 | 1.423421621 | -0.12391739  | No |
| row_480 | Noc3l     | null | null | 5384 | 1.406960726 | -0.12575583  | No |
| row_481 | Top1mt    | null | null | 5391 | 1.399850607 | -0.12559865  | No |
| row_482 | Ppox      | null | null | 5401 | 1.394378662 | -0.12574083  | No |
| row_483 | Dusp18    | null | null | 5407 | 1.388860703 | -0.12548387  | No |
| row_484 | Slc25a29  | null | null | 5411 | 1.388074398 | -0.12502734  | No |
| row_485 | Acad8     | null | null | 5412 | 1.387992263 | -0.12427149  | No |
| row_486 | Sord      | null | null | 5425 | 1.380183816 | -0.124712996 | No |
| row_487 | Galc      | null | null | 5426 | 1.379164696 | -0.12395714  | No |
| row_488 | Ap2m1     | null | null | 5433 | 1.376042485 | -0.123799965 | No |
| row_489 | Armc10    | null | null | 5454 | 1.360972047 | -0.12503971  | No |
| row_490 | Gpd1      | null | null | 5457 | 1.35944438  | -0.12448342  | No |
| row_491 | Opa1      | null | null | 5459 | 1.358728647 | -0.123827346 | No |
| row_492 | Akap10    | null | null | 5469 | 1.352800012 | -0.12396951  | No |
| row_493 | Cmpk2     | null | null | 5492 | 1.3377707   | -0.12540883  | No |
| row_494 | Acads     | null | null | 5496 | 1.334851503 | -0.12495231  | No |
| row_495 | Sod2      | null | null | 5500 | 1.331216693 | -0.12449579  | No |
| row_496 | Akr7a5    | null | null | 5515 | 1.318644047 | -0.12513685  | No |
| row_497 | Spata7    | null | null | 5517 | 1.318313837 | -0.12448078  | No |
| row_498 | Coq10a    | null | null | 5520 | 1.315760136 | -0.12392449  | No |
| row_499 | Prdx2     | null | null | 5522 | 1.312723041 | -0.1232684   | No |
| row_500 | Atp5a1    | null | null | 5525 | 1.309823394 | -0.122712106 | No |
| row_501 | Comt      | null | null | 5526 | 1.309430599 | -0.12195625  | No |
| row_502 | Fitm2     | null | null | 5527 | 1.309401393 | -0.12120039  | No |
| row_503 | Nit1      | null | null | 5532 | 1.304175615 | -0.12084366  | No |
| row_504 | Atp5d     | null | null | 5550 | 1.292449474 | -0.12178407  | No |
| row_505 | Amt       | null | null | 5554 | 1.290746331 | -0.12132755  | No |
| row_506 | Aldoc     | null | null | 5562 | 1.285212874 | -0.12127016  | No |
| row_507 | Mtfp1     | null | null | 5563 | 1.284635544 | -0.120514296 | No |
| row_508 | Mapk1     | null | null | 5580 | 1.279322267 | -0.12135493  | No |
| row_509 | Neu4      | null | null | 5582 | 1.278998375 | -0.120698854 | No |
| row_510 | Acsl6     | null | null | 5588 | 1.278223634 | -0.1204419   | No |
| row_511 | Coq9      | null | null | 5594 | 1.276125431 | -0.12018494  | No |
| row_512 | Ppm1e     | null | null | 5602 | 1.271299005 | -0.120127544 | No |
| row_513 | Dnajc30   | null | null | 5617 | 1.260826707 | -0.120768614 | No |
| row_514 | Ddx28     | null | null | 5627 | 1.25445807  | -0.12091078  | No |
| row_515 | Idh3b     | null | null | 5632 | 1.251594186 | -0.120554045 | No |
| row_516 | Kyat1     | null | null | 5640 | 1.246470571 | -0.12049665  | No |
| row_517 | Anxa1     | null | null | 5658 | 1.23743546  | -0.12143706  | No |
| row_518 | Gapdh     | null | null | 5667 | 1.233139873 | -0.121479444 | No |
| row_519 | Trmu      | null | null | 5682 | 1.224284887 | -0.122120515 | No |
| row_520 | Slc25a11  | null | null | 5687 | 1.220462203 | -0.12176378  | No |
| row_521 | Dlat      | null | null | 5689 | 1.219401002 | -0.121107705 | No |
| row_522 | D10Jhu81e | null | null | 5692 | 1.217714787 | -0.12055141  | No |
| row_523 | Abcb10    | null | null | 5704 | 1.211159587 | -0.120893136 | No |
| row_524 | Adck1     | null | null | 5723 | 1.201917648 | -0.121933326 | No |
| row_525 | Slc25a13  | null | null | 5725 | 1.20121789  | -0.12127724  | No |
| row_526 | Slc25a27  | null | null | 5726 | 1.200457454 | -0.12052139  | No |
| row_527 | Mtx1      | null | null | 5730 | 1.200089931 | -0.12006487  | No |
| row_528 | Ndufa10   | null | null | 5737 | 1.191801667 | -0.1199077   | No |
| row_529 | Pdss2     | null | null | 5743 | 1.18592751  | -0.119650744 | No |
| row_530 | Slc25a37  | null | null | 5745 | 1.185130358 | -0.11899466  | No |

|         |          |      |      |      |              |              |    |
|---------|----------|------|------|------|--------------|--------------|----|
| row_531 | Pycr2    | null | null | 5750 | 1.181620002  | -0.11863793  | No |
| row_532 | Mrpl45   | null | null | 5758 | 1.177889824  | -0.118580535 | No |
| row_533 | Dap3     | null | null | 5767 | 1.17144978   | -0.11862292  | No |
| row_534 | Tamm41   | null | null | 5769 | 1.170014977  | -0.11796684  | No |
| row_535 | Ckmt1    | null | null | 5796 | 1.155171037  | -0.11980528  | No |
| row_536 | Slc25a1  | null | null | 5797 | 1.154243827  | -0.119049415 | No |
| row_537 | Dus2     | null | null | 5804 | 1.151184559  | -0.118892245 | No |
| row_538 | Lyn      | null | null | 5810 | 1.148291945  | -0.11863529  | No |
| row_539 | Suox     | null | null | 5811 | 1.147613883  | -0.11787943  | No |
| row_540 | Fdxr     | null | null | 5813 | 1.146381378  | -0.11722335  | No |
| row_541 | Tomm40   | null | null | 5814 | 1.145564079  | -0.11646749  | No |
| row_542 | Slc30a6  | null | null | 5817 | 1.14279294   | -0.1159112   | No |
| row_543 | Esr1     | null | null | 5818 | 1.14243114   | -0.11515534  | No |
| row_544 | Map1lc3b | null | null | 5844 | 1.132220149  | -0.11689399  | No |
| row_545 | As3mt    | null | null | 5855 | 1.129204988  | -0.11713594  | No |
| row_546 | Aco2     | null | null | 5856 | 1.12805295   | -0.11638008  | No |
| row_547 | Tmtc1    | null | null | 5859 | 1.126435637  | -0.11582378  | No |
| row_548 | Chat     | null | null | 5868 | 1.120303035  | -0.11586617  | No |
| row_549 | Acaa1a   | null | null | 5875 | 1.118386984  | -0.115709    | No |
| row_550 | Braf     | null | null | 5881 | 1.116573691  | -0.11545204  | No |
| row_551 | Rhot1    | null | null | 5882 | 1.116189241  | -0.11469618  | No |
| row_552 | C1qbp    | null | null | 5895 | 1.111651301  | -0.11513769  | No |
| row_553 | Ubb      | null | null | 5906 | 1.106663108  | -0.11537964  | No |
| row_554 | Mrpl37   | null | null | 5908 | 1.105024099  | -0.11472356  | No |
| row_555 | Pdhx     | null | null | 5936 | 1.086140275  | -0.11666177  | No |
| row_556 | Cnp      | null | null | 5945 | 1.083652258  | -0.11670416  | No |
| row_557 | Ndufs2   | null | null | 5952 | 1.079359531  | -0.11654699  | No |
| row_558 | Capn10   | null | null | 5957 | 1.077243924  | -0.11619025  | No |
| row_559 | Ndufs1   | null | null | 5965 | 1.070915699  | -0.116132855 | No |
| row_560 | Cct7     | null | null | 5968 | 1.069877267  | -0.11557656  | No |
| row_561 | Sfxn5    | null | null | 5978 | 1.065988302  | -0.11571872  | No |
| row_562 | Vamp1    | null | null | 5985 | 1.062066674  | -0.11556155  | No |
| row_563 | Dcps     | null | null | 5990 | 1.059567809  | -0.11520481  | No |
| row_564 | Iars2    | null | null | 6002 | 1.054593205  | -0.11554654  | No |
| row_565 | Card19   | null | null | 6018 | 1.046981692  | -0.11628739  | No |
| row_566 | Bag5     | null | null | 6025 | 1.043227315  | -0.11613022  | No |
| row_567 | Isoc2b   | null | null | 6030 | 1.041677117  | -0.11577348  | No |
| row_568 | Ddah2    | null | null | 6052 | 1.029665828  | -0.11711301  | No |
| row_569 | Mlycd    | null | null | 6065 | 1.021879435  | -0.11755452  | No |
| row_570 | Rhoa     | null | null | 6094 | 1.011967897  | -0.11959252  | No |
| row_571 | Ak2      | null | null | 6105 | 1.007686615  | -0.11983446  | No |
| row_572 | Mtg2     | null | null | 6111 | 1.00466454   | -0.119577505 | No |
| row_573 | Mthfd2   | null | null | 6116 | 1.003046393  | -0.11922077  | No |
| row_574 | Mapk8ip1 | null | null | 6121 | -1.002788782 | -0.11886404  | No |
| row_575 | Dhrs1    | null | null | 6126 | -1.004933119 | -0.118507296 | No |
| row_576 | Lrrc59   | null | null | 6130 | -1.006840706 | -0.118050784 | No |
| row_577 | Slc1a3   | null | null | 6131 | -1.006961346 | -0.11729492  | No |
| row_578 | Gfm2     | null | null | 6139 | -1.009041786 | -0.11723753  | No |
| row_579 | Sars     | null | null | 6164 | -1.019652843 | -0.118876405 | No |
| row_580 | Slc25a3  | null | null | 6174 | -1.02440083  | -0.11901857  | No |
| row_581 | Foxred1  | null | null | 6175 | -1.02528739  | -0.118262716 | No |
| row_582 | Nudt6    | null | null | 6177 | -1.027190328 | -0.11760663  | No |
| row_583 | Abca9    | null | null | 6215 | -1.043434143 | -0.12054265  | No |
| row_584 | Eral1    | null | null | 6220 | -1.045260549 | -0.12018592  | No |
| row_585 | Map2k1   | null | null | 6221 | -1.045526147 | -0.11943006  | No |
| row_586 | Kars     | null | null | 6222 | -1.046314955 | -0.118674204 | No |
| row_587 | P4ha1    | null | null | 6283 | -1.074584723 | -0.123905174 | No |
| row_588 | Letmd1   | null | null | 6297 | -1.078640223 | -0.12444646  | No |
| row_589 | Alkbh1   | null | null | 6298 | -1.07873404  | -0.123690605 | No |
| row_590 | Tmem186  | null | null | 6304 | -1.082322001 | -0.12343365  | No |
| row_591 | Slc25a18 | null | null | 6307 | -1.08379066  | -0.12287735  | No |
| row_592 | Fech     | null | null | 6314 | -1.08719945  | -0.122720174 | No |
| row_593 | Aass     | null | null | 6329 | -1.094418883 | -0.123361245 | No |
| row_594 | Rpusd4   | null | null | 6335 | -1.097349644 | -0.12310429  | No |
| row_595 | Mgea5    | null | null | 6346 | -1.103762507 | -0.12334624  | No |
| row_596 | Mtif3    | null | null | 6352 | -1.108437538 | -0.12308928  | No |
| row_597 | Acaa2    | null | null | 6360 | -1.11532402  | -0.123031884 | No |



|         |               |      |      |      |              |              |    |
|---------|---------------|------|------|------|--------------|--------------|----|
| row_598 | Ciapin1       | null | null | 6377 | -1.127071023 | -0.12387252  | No |
| row_599 | Abhd12        | null | null | 6380 | -1.130044341 | -0.12331622  | No |
| row_600 | Parl          | null | null | 6385 | -1.136977553 | -0.12295949  | No |
| row_601 | Comtd1        | null | null | 6391 | -1.140025616 | -0.12270253  | No |
| row_602 | Nt5m          | null | null | 6396 | -1.141565681 | -0.12234579  | No |
| row_603 | Mrpl44        | null | null | 6398 | -1.143575311 | -0.121689714 | No |
| row_604 | Slc25a15      | null | null | 6399 | -1.144333482 | -0.12093386  | No |
| row_605 | Hoxb9         | null | null | 6421 | -1.151726842 | -0.12227339  | No |
| row_606 | Prodh         | null | null | 6430 | -1.157647252 | -0.12231577  | No |
| row_607 | Tmem135       | null | null | 6437 | -1.162997842 | -0.1221586   | No |
| row_608 | Phykpl        | null | null | 6448 | -1.171460152 | -0.122400545 | No |
| row_609 | Mipep         | null | null | 6453 | -1.176584721 | -0.12204381  | No |
| row_610 | Slc16a1       | null | null | 6455 | -1.178070307 | -0.121387735 | No |
| row_611 | Rars          | null | null | 6464 | -1.182522893 | -0.12143012  | No |
| row_612 | Micu1         | null | null | 6496 | -1.194515228 | -0.12376746  | No |
| row_613 | Acbd3         | null | null | 6503 | -1.200517297 | -0.12361028  | No |
| row_614 | Spryd4        | null | null | 6514 | -1.209576726 | -0.12385223  | No |
| row_615 | Coq4          | null | null | 6517 | -1.211387992 | -0.12329593  | No |
| row_616 | Pemt          | null | null | 6535 | -1.221538305 | -0.124236345 | No |
| row_617 | Atg4d         | null | null | 6538 | -1.222115278 | -0.12368005  | No |
| row_618 | Mpv17l2       | null | null | 6543 | -1.227466464 | -0.12332331  | No |
| row_619 | Mapk12        | null | null | 6562 | -1.240274906 | -0.1243635   | No |
| row_620 | Pars2         | null | null | 6568 | -1.245190024 | -0.12410654  | No |
| row_621 | Stk11         | null | null | 6587 | -1.256942987 | -0.12514673  | No |
| row_622 | Cep89         | null | null | 6591 | -1.259579659 | -0.12469022  | No |
| row_623 | Mfn1          | null | null | 6592 | -1.26042521  | -0.12393436  | No |
| row_624 | Slc25a20      | null | null | 6595 | -1.261403322 | -0.12337806  | No |
| row_625 | Dguok         | null | null | 6607 | -1.272910595 | -0.12371979  | No |
| row_626 | Bcl2l1        | null | null | 6652 | -1.305274606 | -0.12735428  | No |
| row_627 | Mtfr1l        | null | null | 6661 | -1.309640169 | -0.12739666  | No |
| row_628 | Ehhadh        | null | null | 6664 | -1.310539365 | -0.12684037  | No |
| row_629 | Rad51         | null | null | 6666 | -1.312627792 | -0.12618428  | No |
| row_630 | Ndufaf7       | null | null | 6673 | -1.316715837 | -0.1260271   | No |
| row_631 | Ppp1r15a      | null | null | 6685 | -1.325673103 | -0.12636884  | No |
| row_632 | Mcur1         | null | null | 6694 | -1.332969666 | -0.12641123  | No |
| row_633 | Nktr          | null | null | 6705 | -1.341600895 | -0.12665316  | No |
| row_634 | Slc25a34      | null | null | 6715 | -1.344793439 | -0.12679534  | No |
| row_635 | Adap2         | null | null | 6740 | -1.361662388 | -0.12843421  | No |
| row_636 | Gsr           | null | null | 6745 | -1.365924597 | -0.12807748  | No |
| row_637 | Pxmp2         | null | null | 6749 | -1.369105697 | -0.12762097  | No |
| row_638 | Mrpl10        | null | null | 6750 | -1.36965251  | -0.1268651   | No |
| row_639 | Pecr          | null | null | 6755 | -1.376085997 | -0.12650837  | No |
| row_640 | Ppp3ca        | null | null | 6763 | -1.386181116 | -0.12645097  | No |
| row_641 | Ncoa4         | null | null | 6788 | -1.411063433 | -0.12808985  | No |
| row_642 | Oxsm          | null | null | 6790 | -1.411330462 | -0.12743376  | No |
| row_643 | Glud1         | null | null | 6821 | -1.439887285 | -0.12967132  | No |
| row_644 | Prr5l         | null | null | 6837 | -1.452314854 | -0.13041218  | No |
| row_645 | Fastkd3       | null | null | 6840 | -1.453123569 | -0.12985587  | No |
| row_646 | Ndufs3        | null | null | 6847 | -1.457847953 | -0.1296987   | No |
| row_647 | Cav1          | null | null | 6852 | -1.460912585 | -0.12934196  | No |
| row_648 | Atp6v1a       | null | null | 6858 | -1.467097759 | -0.129085    | No |
| row_649 | Slc25a39      | null | null | 6859 | -1.471047163 | -0.12832916  | No |
| row_650 | Hacd3         | null | null | 6872 | -1.480469465 | -0.12877066  | No |
| row_651 | Slc25a45      | null | null | 6875 | -1.486242294 | -0.12821436  | No |
| row_652 | Mcat          | null | null | 6888 | -1.496676207 | -0.12865587  | No |
| row_653 | Ykt6          | null | null | 6908 | -1.52192688  | -0.12979583  | No |
| row_654 | Phyh          | null | null | 6911 | -1.523732901 | -0.12923954  | No |
| row_655 | Mrpl43        | null | null | 6913 | -1.524495244 | -0.12858346  | No |
| row_656 | Brinp3        | null | null | 6925 | -1.539889574 | -0.12892519  | No |
| row_657 | Mrpl28        | null | null | 6929 | -1.549821138 | -0.12846868  | No |
| row_658 | Coasy         | null | null | 6951 | -1.569150925 | -0.12980822  | No |
| row_659 | Cyba          | null | null | 6952 | -1.569957852 | -0.12905236  | No |
| row_660 | Adprh12       | null | null | 6957 | -1.573737621 | -0.12869562  | No |
| row_661 | Spr           | null | null | 6973 | -1.591120243 | -0.12943646  | No |
| row_662 | Rab24         | null | null | 6980 | -1.598194957 | -0.12927929  | No |
| row_663 | Slc25a24      | null | null | 6982 | -1.598283172 | -0.12862322  | No |
| row_664 | 1600014C10Rik | null | null | 6983 | -1.598754764 | -0.12786736  | No |

|         |           |      |      |      |              |             |     |
|---------|-----------|------|------|------|--------------|-------------|-----|
| row_665 | Zadh2     | null | null | 6998 | -1.614399076 | -0.12850842 | No  |
| row_666 | Hspd1     | null | null | 6999 | -1.615206599 | -0.12775257 | No  |
| row_667 | Gpt2      | null | null | 7007 | -1.621333003 | -0.12769517 | No  |
| row_668 | Coq5      | null | null | 7026 | -1.643521428 | -0.12873536 | No  |
| row_669 | Poldip2   | null | null | 7029 | -1.650955677 | -0.12817906 | No  |
| row_670 | Reep1     | null | null | 7030 | -1.651575446 | -0.12742321 | No  |
| row_671 | Vdac2     | null | null | 7039 | -1.659523606 | -0.12746559 | No  |
| row_672 | Slc25a17  | null | null | 7048 | -1.673672318 | -0.12750798 | No  |
| row_673 | Amacr     | null | null | 7057 | -1.68515408  | -0.12755036 | No  |
| row_674 | Nif3l1    | null | null | 7063 | -1.696105123 | -0.12729341 | No  |
| row_675 | Coa7      | null | null | 7067 | -1.697702169 | -0.1268369  | No  |
| row_676 | Slc25a19  | null | null | 7068 | -1.697833776 | -0.12608103 | No  |
| row_677 | Acadl     | null | null | 7079 | -1.719028473 | -0.12632298 | No  |
| row_678 | Sco1      | null | null | 7106 | -1.749349475 | -0.12816142 | No  |
| row_679 | Gpn1      | null | null | 7132 | -1.778760672 | -0.12990007 | No  |
| row_680 | Atpaf2    | null | null | 7149 | -1.801508069 | -0.1307407  | No  |
| row_681 | Gatb      | null | null | 7161 | -1.822108865 | -0.13108243 | No  |
| row_682 | Bid       | null | null | 7162 | -1.822134972 | -0.13032657 | No  |
| row_683 | Grpel2    | null | null | 7168 | -1.830789804 | -0.13006961 | No  |
| row_684 | Gstp1     | null | null | 7181 | -1.857334137 | -0.13051112 | No  |
| row_685 | Vrk2      | null | null | 7208 | -1.885925293 | -0.13234955 | No  |
| row_686 | Slc25a28  | null | null | 7210 | -1.887192369 | -0.13169348 | No  |
| row_687 | Gtpbp8    | null | null | 7219 | -1.905473471 | -0.13173586 | No  |
| row_688 | Xrcc3     | null | null | 7235 | -1.936885834 | -0.13247672 | No  |
| row_689 | Abhd6     | null | null | 7238 | -1.938058019 | -0.13192041 | No  |
| row_690 | Chchd10   | null | null | 7248 | -1.955937743 | -0.13206258 | No  |
| row_691 | Mrpl49    | null | null | 7286 | -2.00241971  | -0.1349986  | No  |
| row_692 | Hadh      | null | null | 7295 | -2.012938261 | -0.13504098 | No  |
| row_693 | Trmt1     | null | null | 7312 | -2.040254831 | -0.13588162 | No  |
| row_694 | Slc44a1   | null | null | 7317 | -2.050876141 | -0.13552488 | No  |
| row_695 | Sdsl      | null | null | 7330 | -2.062828541 | -0.13596639 | No  |
| row_696 | Mtpap     | null | null | 7333 | -2.067467928 | -0.1354101  | No  |
| row_697 | Bcl2      | null | null | 7349 | -2.09152174  | -0.13615094 | No  |
| row_698 | Nol3      | null | null | 7359 | -2.119362116 | -0.13629311 | No  |
| row_699 | Ptges2    | null | null | 7362 | -2.124014854 | -0.13573681 | No  |
| row_700 | Golph3    | null | null | 7364 | -2.126166821 | -0.13508074 | No  |
| row_701 | Hax1      | null | null | 7369 | -2.143068552 | -0.134724   | No  |
| row_702 | Abhd11    | null | null | 7383 | -2.170074701 | -0.13526529 | No  |
| row_703 | Caprin2   | null | null | 7390 | -2.178168774 | -0.13510811 | No  |
| row_704 | Bcs1l     | null | null | 7405 | -2.208737612 | -0.13574918 | No  |
| row_705 | Mrps30    | null | null | 7406 | -2.212972641 | -0.13499333 | No  |
| row_706 | Ptcd3     | null | null | 7407 | -2.213463545 | -0.13423747 | No  |
| row_707 | Mrpl2     | null | null | 7421 | -2.225229502 | -0.13477875 | No  |
| row_708 | Ociad1    | null | null | 7425 | -2.228018761 | -0.13432224 | No  |
| row_709 | Mrps7     | null | null | 7426 | -2.229056597 | -0.13356638 | No  |
| row_710 | Sgk1      | null | null | 7440 | -2.251292467 | -0.13410766 | No  |
| row_711 | Atp5b     | null | null | 7451 | -2.269165754 | -0.13434961 | No  |
| row_712 | Nars2     | null | null | 7466 | -2.285134792 | -0.13499069 | No  |
| row_713 | Gcat      | null | null | 7477 | -2.299731016 | -0.13523263 | No  |
| row_714 | Thg1l     | null | null | 7488 | -2.319569111 | -0.13547458 | No  |
| row_715 | Mtch1     | null | null | 7499 | -2.34424758  | -0.13571653 | No  |
| row_716 | Ccdc51    | null | null | 7504 | -2.355716467 | -0.1353598  | No  |
| row_717 | Mrps18a   | null | null | 7513 | -2.375406742 | -0.13540217 | No  |
| row_718 | Mrps12    | null | null | 7532 | -2.407607555 | -0.13644236 | Yes |
| row_719 | Map2k2    | null | null | 7536 | -2.416812181 | -0.13598585 | Yes |
| row_720 | Trmt5     | null | null | 7544 | -2.427974939 | -0.13592845 | Yes |
| row_721 | Nat8f1    | null | null | 7548 | -2.429358482 | -0.13547194 | Yes |
| row_722 | Gabarapl1 | null | null | 7552 | -2.440652609 | -0.13501543 | Yes |
| row_723 | Cd36      | null | null | 7559 | -2.46012187  | -0.13485825 | Yes |
| row_724 | Macrocl1  | null | null | 7570 | -2.476816654 | -0.1351002  | Yes |
| row_725 | Ybey      | null | null | 7572 | -2.47964263  | -0.13444412 | Yes |
| row_726 | Mrm2      | null | null | 7573 | -2.480162144 | -0.13368826 | Yes |
| row_727 | Hnrrnpk   | null | null | 7574 | -2.485645771 | -0.1329324  | Yes |
| row_728 | Tdrkh     | null | null | 7578 | -2.502861023 | -0.13247588 | Yes |
| row_729 | Mapk3     | null | null | 7584 | -2.521585226 | -0.13221893 | Yes |
| row_730 | Lap3      | null | null | 7588 | -2.523762465 | -0.13176242 | Yes |
| row_731 | Nt5c      | null | null | 7589 | -2.527381182 | -0.13100655 | Yes |

|         |            |      |      |      |              |             |     |
|---------|------------|------|------|------|--------------|-------------|-----|
| row_732 | Tango2     | null | null | 7590 | -2.531311512 | -0.13025069 | Yes |
| row_733 | Pacrg      | null | null | 7595 | -2.543083191 | -0.12989396 | Yes |
| row_734 | Ngb        | null | null | 7608 | -2.583889723 | -0.13033547 | Yes |
| row_735 | Oxct1      | null | null | 7614 | -2.594003201 | -0.13007851 | Yes |
| row_736 | Oxnad1     | null | null | 7615 | -2.594465256 | -0.12932266 | Yes |
| row_737 | Mmadhc     | null | null | 7632 | -2.646801472 | -0.13016328 | Yes |
| row_738 | Dars2      | null | null | 7635 | -2.662145615 | -0.12960699 | Yes |
| row_739 | Ifit3b     | null | null | 7645 | -2.676638603 | -0.12974915 | Yes |
| row_740 | Mgme1      | null | null | 7655 | -2.692664146 | -0.12989132 | Yes |
| row_741 | Tsfm       | null | null | 7661 | -2.711207151 | -0.12963437 | Yes |
| row_742 | Mrpl3      | null | null | 7668 | -2.72729826  | -0.12947719 | Yes |
| row_743 | Oma1       | null | null | 7685 | -2.774160147 | -0.13031782 | Yes |
| row_744 | Mrpl19     | null | null | 7721 | -2.858035564 | -0.13305429 | Yes |
| row_745 | Lgals3     | null | null | 7729 | -2.878502607 | -0.13299689 | Yes |
| row_746 | Rab1b      | null | null | 7730 | -2.883603811 | -0.13224103 | Yes |
| row_747 | Fez1       | null | null | 7732 | -2.887315273 | -0.13158494 | Yes |
| row_748 | Mtif2      | null | null | 7741 | -2.906193018 | -0.13162734 | Yes |
| row_749 | Gls        | null | null | 7742 | -2.906574726 | -0.13087147 | Yes |
| row_750 | Myoc       | null | null | 7746 | -2.915161133 | -0.13041496 | Yes |
| row_751 | Hebp1      | null | null | 7761 | -2.951076508 | -0.13105603 | Yes |
| row_752 | Ddx6       | null | null | 7770 | -2.972809076 | -0.13109842 | Yes |
| row_753 | Uxs1       | null | null | 7777 | -2.982473135 | -0.13094124 | Yes |
| row_754 | Gadd45gip1 | null | null | 7784 | -2.999709368 | -0.13078406 | Yes |
| row_755 | Lias       | null | null | 7795 | -3.025215864 | -0.13102601 | Yes |
| row_756 | Lars2      | null | null | 7797 | -3.02647233  | -0.13036993 | Yes |
| row_757 | Sfxn1      | null | null | 7801 | -3.042882681 | -0.12991342 | Yes |
| row_758 | Serhl      | null | null | 7816 | -3.084194422 | -0.13055448 | Yes |
| row_759 | Mtfr1      | null | null | 7839 | -3.157846689 | -0.1319938  | Yes |
| row_760 | Bsg        | null | null | 7850 | -3.185370445 | -0.13223575 | Yes |
| row_761 | Smim20     | null | null | 7853 | -3.193604946 | -0.13167945 | Yes |
| row_762 | Uqcc1      | null | null | 7860 | -3.214009762 | -0.13152227 | Yes |
| row_763 | Hagh       | null | null | 7870 | -3.242093801 | -0.13166444 | Yes |
| row_764 | Dut        | null | null | 7876 | -3.261046648 | -0.13140748 | Yes |
| row_765 | Tspo       | null | null | 7884 | -3.293490171 | -0.13135009 | Yes |
| row_766 | Hspa5      | null | null | 7891 | -3.312300205 | -0.13119292 | Yes |
| row_767 | Eci2       | null | null | 7922 | -3.382910252 | -0.13343047 | Yes |
| row_768 | Suclg2     | null | null | 7923 | -3.387673616 | -0.13267462 | Yes |
| row_769 | Hif3a      | null | null | 7931 | -3.402850151 | -0.13261722 | Yes |
| row_770 | Pdia3      | null | null | 7936 | -3.419475794 | -0.13226049 | Yes |
| row_771 | Ldha       | null | null | 7939 | -3.422772884 | -0.13170418 | Yes |
| row_772 | L2hgdh     | null | null | 7950 | -3.451996088 | -0.13194613 | Yes |
| row_773 | Chchd5     | null | null | 7952 | -3.456046343 | -0.13129006 | Yes |
| row_774 | Ttc19      | null | null | 7974 | -3.519971371 | -0.13262959 | Yes |
| row_775 | Qtrt1      | null | null | 7989 | -3.580135345 | -0.13327065 | Yes |
| row_776 | Gm2a       | null | null | 7991 | -3.585829735 | -0.13261458 | Yes |
| row_777 | Slc25a26   | null | null | 8021 | -3.703247547 | -0.13475236 | Yes |
| row_778 | Pmpcb      | null | null | 8028 | -3.731791258 | -0.13459519 | Yes |
| row_779 | Lactb      | null | null | 8034 | -3.755672455 | -0.13433823 | Yes |
| row_780 | Mrpl9      | null | null | 8043 | -3.780286789 | -0.13438061 | Yes |
| row_781 | Cyc1       | null | null | 8053 | -3.818825006 | -0.13452278 | Yes |
| row_782 | Arl2       | null | null | 8055 | -3.824611902 | -0.1338667  | Yes |
| row_783 | Cryab      | null | null | 8058 | -3.831045866 | -0.1333104  | Yes |
| row_784 | Slc35b3    | null | null | 8066 | -3.858414173 | -0.13325301 | Yes |
| row_785 | Mfsd7b     | null | null | 8080 | -3.907736301 | -0.1337943  | Yes |
| row_786 | Tatdn3     | null | null | 8104 | -4.008947849 | -0.13533339 | Yes |
| row_787 | Mpg        | null | null | 8105 | -4.013735294 | -0.13457753 | Yes |
| row_788 | Rab8b      | null | null | 8106 | -4.022218227 | -0.13382168 | Yes |
| row_789 | Bnip1      | null | null | 8108 | -4.024753571 | -0.1331656  | Yes |
| row_790 | Polg2      | null | null | 8112 | -4.044993401 | -0.13270909 | Yes |
| row_791 | MsrA       | null | null | 8117 | -4.060251713 | -0.13235235 | Yes |
| row_792 | Endog      | null | null | 8122 | -4.094445229 | -0.1319956  | Yes |
| row_793 | Pebp1      | null | null | 8132 | -4.130330563 | -0.13213778 | Yes |
| row_794 | Apex1      | null | null | 8134 | -4.132324696 | -0.13148169 | Yes |
| row_795 | Ppargc1a   | null | null | 8144 | -4.17288065  | -0.13162386 | Yes |
| row_796 | Ywhae      | null | null | 8146 | -4.179256916 | -0.13096778 | Yes |
| row_797 | Uqcc3      | null | null | 8148 | -4.184010506 | -0.13031171 | Yes |
| row_798 | Slc22a4    | null | null | 8162 | -4.248437405 | -0.130853   | Yes |

|         |               |      |      |      |              |              |     |
|---------|---------------|------|------|------|--------------|--------------|-----|
| row_799 | Dusp26        | null | null | 8167 | -4.274590015 | -0.13049626  | Yes |
| row_800 | Stard4        | null | null | 8173 | -4.314545155 | -0.13023931  | Yes |
| row_801 | Adhfe1        | null | null | 8179 | -4.331067085 | -0.12998235  | Yes |
| row_802 | Mrpl34        | null | null | 8181 | -4.340406895 | -0.12932627  | Yes |
| row_803 | Mrps9         | null | null | 8186 | -4.361042976 | -0.12896954  | Yes |
| row_804 | Ppp1cc        | null | null | 8191 | -4.377094746 | -0.1286128   | Yes |
| row_805 | Timm17a       | null | null | 8192 | -4.390330315 | -0.12785694  | Yes |
| row_806 | Fbxw7         | null | null | 8194 | -4.403601646 | -0.12720087  | Yes |
| row_807 | Xaf1          | null | null | 8214 | -4.521070957 | -0.12834084  | Yes |
| row_808 | Fas           | null | null | 8235 | -4.607834339 | -0.12958059  | Yes |
| row_809 | Ethe1         | null | null | 8236 | -4.611383915 | -0.12882473  | Yes |
| row_810 | Stard6        | null | null | 8238 | -4.620233059 | -0.12816866  | Yes |
| row_811 | Fbxo7         | null | null | 8239 | -4.634056091 | -0.1274128   | Yes |
| row_812 | Dbt           | null | null | 8241 | -4.640494347 | -0.12675671  | Yes |
| row_813 | Gstz1         | null | null | 8243 | -4.658217907 | -0.12610064  | Yes |
| row_814 | Dnajc4        | null | null | 8262 | -4.771062851 | -0.12714083  | Yes |
| row_815 | Tcaim         | null | null | 8265 | -4.782747746 | -0.12658453  | Yes |
| row_816 | Clic1         | null | null | 8269 | -4.803500652 | -0.12612802  | Yes |
| row_817 | Mrps11        | null | null | 8273 | -4.816332817 | -0.1256715   | Yes |
| row_818 | Becn1         | null | null | 8299 | -4.961402893 | -0.12741016  | Yes |
| row_819 | Trak2         | null | null | 8308 | -5.019854069 | -0.12745254  | Yes |
| row_820 | Auh           | null | null | 8312 | -5.043000698 | -0.12699603  | Yes |
| row_821 | Abcg2         | null | null | 8315 | -5.060030937 | -0.12643974  | Yes |
| row_822 | Fxn           | null | null | 8317 | -5.065469265 | -0.12578365  | Yes |
| row_823 | Slc25a33      | null | null | 8332 | -5.131250858 | -0.12642471  | Yes |
| row_824 | Mrpl16        | null | null | 8337 | -5.149276733 | -0.12606798  | Yes |
| row_825 | Nudt9         | null | null | 8338 | -5.149444103 | -0.12531212  | Yes |
| row_826 | Ppp2r2b       | null | null | 8339 | -5.151051998 | -0.124556266 | Yes |
| row_827 | Etnppl        | null | null | 8341 | -5.153329372 | -0.12390019  | Yes |
| row_828 | Suc1g1        | null | null | 8349 | -5.188228607 | -0.1238428   | Yes |
| row_829 | 1700021F05Rik | null | null | 8357 | -5.228873253 | -0.12378541  | Yes |
| row_830 | Pdk1          | null | null | 8362 | -5.238944054 | -0.123428665 | Yes |
| row_831 | Mrps26        | null | null | 8364 | -5.248119354 | -0.12277259  | Yes |
| row_832 | Cyp27a1       | null | null | 8386 | -5.396493435 | -0.12411212  | Yes |
| row_833 | Cyp1b1        | null | null | 8390 | -5.409810066 | -0.1236556   | Yes |
| row_834 | Rpp14         | null | null | 8391 | -5.413635254 | -0.12289975  | Yes |
| row_835 | Bad           | null | null | 8394 | -5.426966667 | -0.12234345  | Yes |
| row_836 | Slc25a32      | null | null | 8416 | -5.643331051 | -0.12368298  | Yes |
| row_837 | Atp6v1e1      | null | null | 8417 | -5.647609234 | -0.12292712  | Yes |
| row_838 | Hrk           | null | null | 8418 | -5.650303364 | -0.12217127  | Yes |
| row_839 | Ghr           | null | null | 8429 | -5.739111423 | -0.12241321  | Yes |
| row_840 | Ucp3          | null | null | 8430 | -5.744561672 | -0.12165736  | Yes |
| row_841 | Hemk1         | null | null | 8432 | -5.756567478 | -0.12100128  | Yes |
| row_842 | Tfb2m         | null | null | 8433 | -5.757839203 | -0.12024542  | Yes |
| row_843 | Mars2         | null | null | 8439 | -5.782354355 | -0.119988464 | Yes |
| row_844 | Sgpp1         | null | null | 8441 | -5.804055214 | -0.11933239  | Yes |
| row_845 | Ppid          | null | null | 8458 | -5.903687477 | -0.120173015 | Yes |
| row_846 | 2810006K23Rik | null | null | 8469 | -5.951928139 | -0.120414965 | Yes |
| row_847 | Abcd2         | null | null | 8473 | -5.982910156 | -0.119958445 | Yes |
| row_848 | Tusc2         | null | null | 8481 | -6.035149574 | -0.11990105  | Yes |
| row_849 | Ndufs7        | null | null | 8482 | -6.047410011 | -0.11914519  | Yes |
| row_850 | Bax           | null | null | 8511 | -6.23724699  | -0.121183194 | Yes |
| row_851 | Yrdc          | null | null | 8520 | -6.316610336 | -0.12122557  | Yes |
| row_852 | Ercc6l2       | null | null | 8531 | -6.360164165 | -0.12146752  | Yes |
| row_853 | Mrps25        | null | null | 8533 | -6.375924587 | -0.12081145  | Yes |
| row_854 | Ifit3         | null | null | 8534 | -6.377792358 | -0.120055586 | Yes |
| row_855 | Preli1        | null | null | 8545 | -6.440027237 | -0.120297536 | Yes |
| row_856 | Cyb5b         | null | null | 8548 | -6.469127178 | -0.11974124  | Yes |
| row_857 | Vhl           | null | null | 8550 | -6.472899914 | -0.11908516  | Yes |
| row_858 | Rad51c        | null | null | 8552 | -6.47774744  | -0.11842908  | Yes |
| row_859 | Dnm1l         | null | null | 8558 | -6.518179417 | -0.11817213  | Yes |
| row_860 | Fars2         | null | null | 8563 | -6.550168037 | -0.11781539  | Yes |
| row_861 | Txn2          | null | null | 8574 | -6.604828358 | -0.11805734  | Yes |
| row_862 | Lactb2        | null | null | 8576 | -6.652994633 | -0.117401265 | Yes |
| row_863 | Mrps23        | null | null | 8588 | -6.735428333 | -0.117742985 | Yes |
| row_864 | Dnlz          | null | null | 8612 | -6.907063007 | -0.11928208  | Yes |
| row_865 | Cmc2          | null | null | 8620 | -6.951449871 | -0.11922469  | Yes |

|         |           |      |      |      |              |              |     |
|---------|-----------|------|------|------|--------------|--------------|-----|
| row_866 | Coa4      | null | null | 8621 | -6.956696987 | -0.11846883  | Yes |
| row_867 | Sirt1     | null | null | 8627 | -6.991393089 | -0.11821187  | Yes |
| row_868 | Mrps35    | null | null | 8642 | -7.18482542  | -0.11885294  | Yes |
| row_869 | Pak7      | null | null | 8645 | -7.221498489 | -0.118296646 | Yes |
| row_870 | Cfl1      | null | null | 8646 | -7.234813213 | -0.11754079  | Yes |
| row_871 | Tmem11    | null | null | 8648 | -7.24037838  | -0.11688471  | Yes |
| row_872 | Aldh6a1   | null | null | 8657 | -7.305575848 | -0.116927095 | Yes |
| row_873 | Uri1      | null | null | 8668 | -7.365706921 | -0.117169045 | Yes |
| row_874 | Ppa2      | null | null | 8673 | -7.409092903 | -0.1168123   | Yes |
| row_875 | Pold4     | null | null | 8675 | -7.425961971 | -0.11615623  | Yes |
| row_876 | Tppp      | null | null | 8679 | -7.450469971 | -0.115699716 | Yes |
| row_877 | Mpst      | null | null | 8682 | -7.481423855 | -0.11514342  | Yes |
| row_878 | Nudt1     | null | null | 8706 | -7.744891644 | -0.11668251  | Yes |
| row_879 | Mtg1      | null | null | 8715 | -7.807396889 | -0.11672489  | Yes |
| row_880 | Gsta4     | null | null | 8725 | -7.868164539 | -0.116867065 | Yes |
| row_881 | Higd2a    | null | null | 8729 | -7.905550957 | -0.116410546 | Yes |
| row_882 | Sh3glb1   | null | null | 8745 | -8.053488731 | -0.117151394 | Yes |
| row_883 | Tfb1m     | null | null | 8751 | -8.152229309 | -0.11689444  | Yes |
| row_884 | Fkbp8     | null | null | 8761 | -8.301417351 | -0.1170366   | Yes |
| row_885 | Ndufa9    | null | null | 8773 | -8.412945747 | -0.11737833  | Yes |
| row_886 | Cox5a     | null | null | 8790 | -8.647891998 | -0.118218966 | Yes |
| row_887 | Gja1      | null | null | 8793 | -8.680226326 | -0.11766267  | Yes |
| row_888 | Pon2      | null | null | 8800 | -8.743035316 | -0.11750549  | Yes |
| row_889 | Pcca      | null | null | 8806 | -8.781692505 | -0.117248535 | Yes |
| row_890 | Mrpl14    | null | null | 8821 | -8.893301964 | -0.117889605 | Yes |
| row_891 | Cox6b2    | null | null | 8834 | -9.038023949 | -0.11833111  | Yes |
| row_892 | Mapk8     | null | null | 8836 | -9.050470352 | -0.117675036 | Yes |
| row_893 | Ak4       | null | null | 8837 | -9.071762085 | -0.116919175 | Yes |
| row_894 | Dhrs4     | null | null | 8844 | -9.149191856 | -0.116762005 | Yes |
| row_895 | Cisd1     | null | null | 8846 | -9.166194916 | -0.11610592  | Yes |
| row_896 | Clpp      | null | null | 8851 | -9.22636795  | -0.11574919  | Yes |
| row_897 | Cpne3     | null | null | 8860 | -9.343126297 | -0.115791574 | Yes |
| row_898 | Rars2     | null | null | 8882 | -9.572128296 | -0.11713111  | Yes |
| row_899 | Tst       | null | null | 8886 | -9.602250099 | -0.11667459  | Yes |
| row_900 | Me1       | null | null | 8894 | -9.689884186 | -0.116617195 | Yes |
| row_901 | Abcb1b    | null | null | 8901 | -9.855746269 | -0.11646002  | Yes |
| row_902 | Ranbp2    | null | null | 8903 | -9.886762619 | -0.11580394  | Yes |
| row_903 | Aim2      | null | null | 8911 | -10.0067873  | -0.11574655  | Yes |
| row_904 | Cpox      | null | null | 8916 | -10.08503819 | -0.11538981  | Yes |
| row_905 | Mrrf      | null | null | 8970 | -10.69846153 | -0.11992232  | Yes |
| row_906 | Ptcd2     | null | null | 8997 | -11.09209251 | -0.121760756 | Yes |
| row_907 | Mrps17    | null | null | 9010 | -11.25024986 | -0.12220226  | Yes |
| row_908 | Pten      | null | null | 9019 | -11.41794682 | -0.12224465  | Yes |
| row_909 | Stoml2    | null | null | 9020 | -11.44312763 | -0.12148879  | Yes |
| row_910 | Sdhaf2    | null | null | 9022 | -11.44784069 | -0.12083271  | Yes |
| row_911 | Cox11     | null | null | 9025 | -11.46237469 | -0.120276414 | Yes |
| row_912 | Fh1       | null | null | 9034 | -11.57426643 | -0.1203188   | Yes |
| row_913 | Erbp4     | null | null | 9035 | -11.57727432 | -0.119562946 | Yes |
| row_914 | Fbxl4     | null | null | 9047 | -11.70630932 | -0.119904675 | Yes |
| row_915 | Cox7a1    | null | null | 9050 | -11.77324963 | -0.11934838  | Yes |
| row_916 | Plgrkt    | null | null | 9061 | -11.94862652 | -0.11959032  | Yes |
| row_917 | Tmem65    | null | null | 9067 | -12.0536499  | -0.119333364 | Yes |
| row_918 | Ari2bp    | null | null | 9079 | -12.26266003 | -0.11967509  | Yes |
| row_919 | Nme6      | null | null | 9106 | -12.6298542  | -0.12151353  | Yes |
| row_920 | Ccm2      | null | null | 9127 | -12.82771969 | -0.12275328  | Yes |
| row_921 | Clpx      | null | null | 9162 | -13.47883701 | -0.12538996  | Yes |
| row_922 | Pcf11     | null | null | 9169 | -13.53768921 | -0.12523279  | Yes |
| row_923 | Guf1      | null | null | 9175 | -13.58656788 | -0.12497583  | Yes |
| row_924 | Gatc      | null | null | 9191 | -13.758255   | -0.12571667  | Yes |
| row_925 | Ppm1k     | null | null | 9192 | -13.7719965  | -0.12496082  | Yes |
| row_926 | Snn       | null | null | 9197 | -13.88101292 | -0.12460408  | Yes |
| row_927 | Rfk       | null | null | 9199 | -13.94225788 | -0.12394801  | Yes |
| row_928 | Nipsnap3b | null | null | 9210 | -14.26474953 | -0.12418995  | Yes |
| row_929 | Cisd2     | null | null | 9225 | -14.56065559 | -0.12483102  | Yes |
| row_930 | Fahd1     | null | null | 9227 | -14.56924629 | -0.124174945 | Yes |
| row_931 | Casp8ap2  | null | null | 9236 | -14.87312126 | -0.12421733  | Yes |
| row_932 | Glyat     | null | null | 9237 | -14.89055157 | -0.12346147  | Yes |

|         |          |      |      |      |              |              |     |
|---------|----------|------|------|------|--------------|--------------|-----|
| row_933 | Bdnf     | null | null | 9249 | -15.04542065 | -0.1238032   | Yes |
| row_934 | Tomm20   | null | null | 9259 | -15.21238327 | -0.12394536  | Yes |
| row_935 | Phb      | null | null | 9276 | -15.61261749 | -0.124786    | Yes |
| row_936 | Pgr      | null | null | 9287 | -15.77380753 | -0.12502794  | Yes |
| row_937 | Park7    | null | null | 9289 | -15.90094566 | -0.124371864 | Yes |
| row_938 | Dctn6    | null | null | 9293 | -15.98540688 | -0.12391535  | Yes |
| row_939 | Coa5     | null | null | 9298 | -16.07702827 | -0.12355861  | Yes |
| row_940 | Csde1    | null | null | 9310 | -16.42247772 | -0.12390034  | Yes |
| row_941 | Ptgr2    | null | null | 9311 | -16.43027115 | -0.123144485 | Yes |
| row_942 | Uchl5    | null | null | 9318 | -16.54318428 | -0.12298731  | Yes |
| row_943 | Atxn3    | null | null | 9319 | -16.54673195 | -0.122231446 | Yes |
| row_944 | Timm13   | null | null | 9328 | -16.73526955 | -0.12227383  | Yes |
| row_945 | Pgam5    | null | null | 9333 | -16.93280029 | -0.1219171   | Yes |
| row_946 | Tmem160  | null | null | 9334 | -16.94737244 | -0.121161245 | Yes |
| row_947 | Slc25a16 | null | null | 9351 | -17.2355957  | -0.12200187  | Yes |
| row_948 | Rps6kb1  | null | null | 9357 | -17.37483025 | -0.121744916 | Yes |
| row_949 | Nudt2    | null | null | 9361 | -17.40889549 | -0.1212884   | Yes |
| row_950 | Ndufaf3  | null | null | 9362 | -17.49358749 | -0.12053254  | Yes |
| row_951 | Timm22   | null | null | 9366 | -17.53284073 | -0.12007602  | Yes |
| row_952 | Pdss1    | null | null | 9370 | -17.60705376 | -0.11961951  | Yes |
| row_953 | Dhfr     | null | null | 9375 | -17.68106461 | -0.11926277  | Yes |
| row_954 | Dctpp1   | null | null | 9382 | -17.84201622 | -0.1191056   | Yes |
| row_955 | Akr1b10  | null | null | 9392 | -18.05519485 | -0.119247764 | Yes |
| row_956 | Slc25a36 | null | null | 9406 | -18.37786102 | -0.11978905  | Yes |
| row_957 | Nfu1     | null | null | 9413 | -18.52360344 | -0.11963188  | Yes |
| row_958 | Fdx1     | null | null | 9423 | -18.87505341 | -0.11977404  | Yes |
| row_959 | Acadsb   | null | null | 9429 | -18.9678688  | -0.11951709  | Yes |
| row_960 | Bola1    | null | null | 9434 | -19.07062531 | -0.119160354 | Yes |
| row_961 | Sdhc     | null | null | 9437 | -19.20131493 | -0.11860406  | Yes |
| row_962 | Diablo   | null | null | 9445 | -19.28621101 | -0.11854666  | Yes |
| row_963 | Metap1d  | null | null | 9450 | -19.37894249 | -0.11818992  | Yes |
| row_964 | Sirt3    | null | null | 9453 | -19.47476387 | -0.117633626 | Yes |
| row_965 | Cwc15    | null | null | 9459 | -19.6007843  | -0.11737667  | Yes |
| row_966 | Nudt13   | null | null | 9465 | -19.71403694 | -0.117119715 | Yes |
| row_967 | Surf1    | null | null | 9478 | -19.95809746 | -0.11756123  | Yes |
| row_968 | Cisd3    | null | null | 9498 | -20.5403347  | -0.1187012   | Yes |
| row_969 | Mrpl57   | null | null | 9499 | -20.60731506 | -0.117945336 | Yes |
| row_970 | Isca1    | null | null | 9505 | -20.71168709 | -0.11768838  | Yes |
| row_971 | Cnr1     | null | null | 9507 | -20.77907181 | -0.117032304 | Yes |
| row_972 | Pptc7    | null | null | 9514 | -20.98081017 | -0.11687513  | Yes |
| row_973 | Jtb      | null | null | 9516 | -21.00700378 | -0.11621905  | Yes |
| row_974 | Ndufs5   | null | null | 9517 | -21.03370476 | -0.1154632   | Yes |
| row_975 | Clybl    | null | null | 9521 | -21.16021919 | -0.11500668  | Yes |
| row_976 | Slc25a40 | null | null | 9535 | -21.97784042 | -0.11554797  | Yes |
| row_977 | Mrpl55   | null | null | 9547 | -22.21569252 | -0.11588969  | Yes |
| row_978 | Gcsh     | null | null | 9553 | -22.3434124  | -0.115632735 | Yes |
| row_979 | Ptpmt1   | null | null | 9559 | -22.50498772 | -0.11537578  | Yes |
| row_980 | Agps     | null | null | 9562 | -22.54671097 | -0.11481949  | Yes |
| row_981 | Rnf5     | null | null | 9571 | -22.86269951 | -0.114861876 | Yes |
| row_982 | Gfer     | null | null | 9582 | -23.19923782 | -0.11510382  | Yes |
| row_983 | Nr3c1    | null | null | 9595 | -23.51283455 | -0.115545325 | Yes |
| row_984 | Ndufaf1  | null | null | 9603 | -23.62001228 | -0.11548793  | Yes |
| row_985 | Rexo2    | null | null | 9606 | -23.75908279 | -0.114931636 | Yes |
| row_986 | Isoc2a   | null | null | 9607 | -23.80036163 | -0.114175774 | Yes |
| row_987 | Bag1     | null | null | 9612 | -24.0206356  | -0.11381904  | Yes |
| row_988 | Alkbh7   | null | null | 9620 | -24.27889442 | -0.11376165  | Yes |
| row_989 | Micu2    | null | null | 9631 | -24.87324905 | -0.11400359  | Yes |
| row_990 | Ndufb10  | null | null | 9634 | -24.98407745 | -0.11344729  | Yes |
| row_991 | Micu3    | null | null | 9642 | -25.30237579 | -0.1133899   | Yes |
| row_992 | Mrps16   | null | null | 9645 | -25.3657341  | -0.112833604 | Yes |
| row_993 | Prdx6    | null | null | 9649 | -25.54658508 | -0.11237709  | Yes |
| row_994 | Eci1     | null | null | 9651 | -25.62137604 | -0.11172101  | Yes |
| row_995 | Coq10b   | null | null | 9654 | -25.65528297 | -0.11116471  | Yes |
| row_996 | Sod1     | null | null | 9657 | -25.82836533 | -0.11060842  | Yes |
| row_997 | Glrx2    | null | null | 9684 | -26.60131645 | -0.11244685  | Yes |
| row_998 | Trnt1    | null | null | 9693 | -26.91167068 | -0.11248924  | Yes |
| row_999 | Nsun3    | null | null | 9696 | -27.04464722 | -0.11193294  | Yes |

|          |          |      |      |       |              |              |     |
|----------|----------|------|------|-------|--------------|--------------|-----|
| row_1000 | Ndufaf6  | null | null | 9704  | -27.30491638 | -0.11187555  | Yes |
| row_1001 | Abhd10   | null | null | 9707  | -27.37851524 | -0.11131925  | Yes |
| row_1002 | Slc25a4  | null | null | 9712  | -27.59967422 | -0.11096252  | Yes |
| row_1003 | Crebzf   | null | null | 9725  | -28.0343895  | -0.111404024 | Yes |
| row_1004 | Ado      | null | null | 9732  | -28.18508911 | -0.11124685  | Yes |
| row_1005 | Mobp     | null | null | 9739  | -28.66893005 | -0.11108967  | Yes |
| row_1006 | Chchd7   | null | null | 9755  | -29.1933918  | -0.11183052  | Yes |
| row_1007 | Mrpl39   | null | null | 9766  | -29.67875099 | -0.11207247  | Yes |
| row_1008 | Timmdc1  | null | null | 9777  | -30.19294357 | -0.11231442  | Yes |
| row_1009 | Tomm22   | null | null | 9796  | -31.08649635 | -0.11335461  | Yes |
| row_1010 | Tomm40l  | null | null | 9816  | -31.93983078 | -0.11449458  | Yes |
| row_1011 | Mtch2    | null | null | 9821  | -32.15523911 | -0.11413784  | Yes |
| row_1012 | Tyms     | null | null | 9830  | -32.66235733 | -0.11418023  | Yes |
| row_1013 | Col4a3bp | null | null | 9837  | -32.95975494 | -0.11402305  | Yes |
| row_1014 | Creb1    | null | null | 9844  | -33.38456726 | -0.113865875 | Yes |
| row_1015 | Eny2     | null | null | 9848  | -33.47211456 | -0.11340936  | Yes |
| row_1016 | Prdx5    | null | null | 9859  | -33.85455322 | -0.113651305 | Yes |
| row_1017 | Isca2    | null | null | 9865  | -34.08067703 | -0.11339435  | Yes |
| row_1018 | Sfxn4    | null | null | 9872  | -34.55498123 | -0.11323718  | Yes |
| row_1019 | Chchd4   | null | null | 9880  | -34.95825577 | -0.11317978  | Yes |
| row_1020 | Hsd12    | null | null | 9881  | -35.11917496 | -0.11242393  | Yes |
| row_1021 | Cox20    | null | null | 9887  | -35.4295845  | -0.11216697  | Yes |
| row_1022 | Ndufa11  | null | null | 9890  | -35.52186966 | -0.11161067  | Yes |
| row_1023 | Msrb2    | null | null | 9893  | -35.61967087 | -0.111054376 | Yes |
| row_1024 | Prkar2b  | null | null | 9897  | -36.05644989 | -0.11059786  | Yes |
| row_1025 | Kras     | null | null | 9901  | -36.46847916 | -0.110141344 | Yes |
| row_1026 | Sdhd     | null | null | 9906  | -36.68238068 | -0.1097846   | Yes |
| row_1027 | Atp5g3   | null | null | 9913  | -37.01175308 | -0.10962743  | Yes |
| row_1028 | Nthl1    | null | null | 9914  | -37.04969406 | -0.10887157  | Yes |
| row_1029 | Pstk     | null | null | 9924  | -37.30030823 | -0.109013736 | Yes |
| row_1030 | Uros     | null | null | 9927  | -37.41860199 | -0.108457446 | Yes |
| row_1031 | Rmdn2    | null | null | 9935  | -37.97363281 | -0.10840005  | Yes |
| row_1032 | Tfrc     | null | null | 9940  | -38.28883362 | -0.10804331  | Yes |
| row_1033 | Mrpl17   | null | null | 9948  | -38.69493866 | -0.10798592  | Yes |
| row_1034 | Mycbp    | null | null | 9953  | -38.89450455 | -0.10762918  | Yes |
| row_1035 | BC026585 | null | null | 9955  | -39.0784111  | -0.106973104 | Yes |
| row_1036 | Pnpt1    | null | null | 9957  | -39.1652565  | -0.10631703  | Yes |
| row_1037 | Abce1    | null | null | 9962  | -39.57680511 | -0.10596029  | Yes |
| row_1038 | Siva1    | null | null | 9966  | -39.77045059 | -0.105503775 | Yes |
| row_1039 | Mrpl46   | null | null | 9972  | -40.10016251 | -0.10524682  | Yes |
| row_1040 | G0s2     | null | null | 9981  | -40.59399796 | -0.105289206 | Yes |
| row_1041 | Dimt1    | null | null | 9985  | -40.85116959 | -0.10483269  | Yes |
| row_1042 | P2ry12   | null | null | 9989  | -41.17295074 | -0.104376175 | Yes |
| row_1043 | Coa3     | null | null | 9996  | -41.46343231 | -0.104219    | Yes |
| row_1044 | Immmp2l  | null | null | 10002 | -41.76685715 | -0.10396204  | Yes |
| row_1045 | Mrpl23   | null | null | 10021 | -43.24662781 | -0.10500223  | Yes |
| row_1046 | Pin1     | null | null | 10022 | -43.45586014 | -0.10424637  | Yes |
| row_1047 | Tomm70a  | null | null | 10033 | -44.77823257 | -0.10448832  | Yes |
| row_1048 | Glrx5    | null | null | 10034 | -44.81364441 | -0.10373247  | Yes |
| row_1049 | Malsu1   | null | null | 10043 | -45.1876297  | -0.103774846 | Yes |
| row_1050 | Gtpbp10  | null | null | 10048 | -45.46854782 | -0.10341811  | Yes |
| row_1051 | Ndufaf4  | null | null | 10058 | -46.54335403 | -0.10356028  | Yes |
| row_1052 | Cox19    | null | null | 10072 | -47.35327911 | -0.10410157  | Yes |
| row_1053 | Pcbd2    | null | null | 10073 | -47.47594833 | -0.10334571  | Yes |
| row_1054 | Nubpl    | null | null | 10088 | -48.5483551  | -0.10398678  | Yes |
| row_1055 | Uqcrc2   | null | null | 10089 | -48.59988403 | -0.10323092  | Yes |
| row_1056 | Snca     | null | null | 10093 | -48.96699905 | -0.102774404 | Yes |
| row_1057 | Coq3     | null | null | 10099 | -49.43915939 | -0.10251745  | Yes |
| row_1058 | Lymr1    | null | null | 10111 | -50.40526581 | -0.10285918  | Yes |
| row_1059 | Sdhaf1   | null | null | 10121 | -50.80779266 | -0.10300134  | Yes |
| row_1060 | Ak3      | null | null | 10129 | -51.45952988 | -0.10294395  | Yes |
| row_1061 | Cox4i1   | null | null | 10135 | -51.9659996  | -0.102686994 | Yes |
| row_1062 | Timm21   | null | null | 10146 | -53.04618835 | -0.10292894  | Yes |
| row_1063 | Nol7     | null | null | 10150 | -53.28798294 | -0.102472425 | Yes |
| row_1064 | Rps15a   | null | null | 10155 | -53.77290344 | -0.10211569  | Yes |
| row_1065 | Oxld1    | null | null | 10156 | -53.78178024 | -0.10135983  | Yes |
| row_1066 | mt-Tt    | null | null | 10162 | -54.08966446 | -0.10110287  | Yes |

|          |               |      |      |       |              |              |     |
|----------|---------------|------|------|-------|--------------|--------------|-----|
| row_1067 | Mrpl15        | null | null | 10165 | -54.14429855 | -0.100546576 | Yes |
| row_1068 | Mrpl40        | null | null | 10166 | -54.17938995 | -0.09979072  | Yes |
| row_1069 | Mrps28        | null | null | 10168 | -54.25280762 | -0.09913464  | Yes |
| row_1070 | Mterf4        | null | null | 10187 | -56.06287766 | -0.10017483  | Yes |
| row_1071 | Mrpl21        | null | null | 10188 | -56.15470123 | -0.099418975 | Yes |
| row_1072 | Armc1         | null | null | 10192 | -56.62251663 | -0.098962456 | Yes |
| row_1073 | Tfam          | null | null | 10194 | -56.79144669 | -0.09830638  | Yes |
| row_1074 | Tusc3         | null | null | 10199 | -57.31978989 | -0.09794965  | Yes |
| row_1075 | Ssbp1         | null | null | 10206 | -57.8459053  | -0.09779247  | Yes |
| row_1076 | Fam213a       | null | null | 10213 | -59.10402298 | -0.09763529  | Yes |
| row_1077 | Hscb          | null | null | 10219 | -59.78435135 | -0.097378336 | Yes |
| row_1078 | Slc25a46      | null | null | 10224 | -60.28212738 | -0.0970216   | Yes |
| row_1079 | Ghitm         | null | null | 10226 | -60.34692764 | -0.09636553  | Yes |
| row_1080 | Dnajc15       | null | null | 10236 | -61.1727829  | -0.09650769  | Yes |
| row_1081 | Pet100        | null | null | 10246 | -62.41042709 | -0.096649855 | Yes |
| row_1082 | Chchd6        | null | null | 10254 | -63.19470596 | -0.09659246  | Yes |
| row_1083 | Mut           | null | null | 10271 | -65.41750336 | -0.09743309  | Yes |
| row_1084 | Gdap1         | null | null | 10275 | -66.26888275 | -0.09697658  | Yes |
| row_1085 | Cmc1          | null | null | 10282 | -67.03113556 | -0.0968194   | Yes |
| row_1086 | Fmc1          | null | null | 10295 | -68.77264404 | -0.09726091  | Yes |
| row_1087 | Mat2b         | null | null | 10303 | -69.92798615 | -0.097203515 | Yes |
| row_1088 | Ndufb7        | null | null | 10306 | -70.14627838 | -0.09664722  | Yes |
| row_1089 | mt-Nd5        | null | null | 10320 | -71.7754364  | -0.09718851  | Yes |
| row_1090 | Pthr2         | null | null | 10323 | -72.17381287 | -0.09663221  | Yes |
| row_1091 | Atp5c1        | null | null | 10327 | -72.67047882 | -0.09617569  | Yes |
| row_1092 | Ccdc58        | null | null | 10333 | -73.21050262 | -0.09591874  | Yes |
| row_1093 | Aurkaip1      | null | null | 10335 | -73.55129242 | -0.09526266  | Yes |
| row_1094 | Bok           | null | null | 10340 | -74.38480377 | -0.09490593  | Yes |
| row_1095 | Ndufaf2       | null | null | 10351 | -75.30464172 | -0.09514787  | Yes |
| row_1096 | Ireb2         | null | null | 10360 | -75.9850769  | -0.09519026  | Yes |
| row_1097 | Gatm          | null | null | 10370 | -77.37644958 | -0.09533242  | Yes |
| row_1098 | Mrpl20        | null | null | 10377 | -78.18450928 | -0.09517525  | Yes |
| row_1099 | Oxr1          | null | null | 10379 | -78.50544739 | -0.09451917  | Yes |
| row_1100 | Rpl35a        | null | null | 10381 | -78.56951141 | -0.09386309  | Yes |
| row_1101 | Rrm2b         | null | null | 10384 | -78.67315674 | -0.093306795 | Yes |
| row_1102 | Rpl10a        | null | null | 10385 | -78.81176758 | -0.09255094  | Yes |
| row_1103 | Tmem70        | null | null | 10386 | -78.95426178 | -0.09179508  | Yes |
| row_1104 | Atp5k         | null | null | 10393 | -80.08720398 | -0.09163791  | Yes |
| row_1105 | Atad1         | null | null | 10402 | -80.63222504 | -0.091680296 | Yes |
| row_1106 | Atp5g1        | null | null | 10403 | -80.78824615 | -0.090924434 | Yes |
| row_1107 | Iscu          | null | null | 10406 | -81.19332886 | -0.09036814  | Yes |
| row_1108 | Rdh14         | null | null | 10407 | -81.45159912 | -0.08961228  | Yes |
| row_1109 | Ndufa8        | null | null | 10411 | -81.88077545 | -0.08915576  | Yes |
| row_1110 | Gpx1          | null | null | 10421 | -83.44191742 | -0.08929793  | Yes |
| row_1111 | Hebp2         | null | null | 10422 | -83.63102722 | -0.088542074 | Yes |
| row_1112 | Ndufa13       | null | null | 10427 | -84.91810608 | -0.08818533  | Yes |
| row_1113 | Chchd1        | null | null | 10430 | -85.17641449 | -0.087629035 | Yes |
| row_1114 | P2ry1         | null | null | 10438 | -87.35630035 | -0.08757164  | Yes |
| row_1115 | Hadhb         | null | null | 10440 | -87.66394806 | -0.08691557  | Yes |
| row_1116 | 1700123O20Rik | null | null | 10448 | -88.73156738 | -0.086858176 | Yes |
| row_1117 | mt-Tp         | null | null | 10451 | -89.54573059 | -0.08630188  | Yes |
| row_1118 | Mpv17l        | null | null | 10452 | -89.56101227 | -0.08554602  | Yes |
| row_1119 | Pdp1          | null | null | 10457 | -90.84617615 | -0.08518928  | Yes |
| row_1120 | Nadk2         | null | null | 10458 | -90.9777832  | -0.08443342  | Yes |
| row_1121 | Mrpl32        | null | null | 10459 | -91.17756653 | -0.08367757  | Yes |
| row_1122 | Mrpl11        | null | null | 10461 | -91.59705353 | -0.083021484 | Yes |
| row_1123 | Glrx          | null | null | 10466 | -93.67127228 | -0.08266475  | Yes |
| row_1124 | Mrpl35        | null | null | 10471 | -93.95879364 | -0.08230802  | Yes |
| row_1125 | Dnajc19       | null | null | 10476 | -94.38348389 | -0.08195128  | Yes |
| row_1126 | Cox7a2l       | null | null | 10482 | -94.97776794 | -0.08169433  | Yes |
| row_1127 | Mrps31        | null | null | 10487 | -95.94171143 | -0.081337586 | Yes |
| row_1128 | Sccpdh        | null | null | 10504 | -98.46676636 | -0.08217822  | Yes |
| row_1129 | Ndufaf5       | null | null | 10510 | -99.18267059 | -0.081921265 | Yes |
| row_1130 | Mrpl50        | null | null | 10512 | -99.57808685 | -0.08126519  | Yes |
| row_1131 | Echs1         | null | null | 10532 | -102.5301971 | -0.08240516  | Yes |
| row_1132 | Mrps15        | null | null | 10533 | -102.5806046 | -0.081649296 | Yes |
| row_1133 | Bloc1s2       | null | null | 10535 | -102.9868927 | -0.08099322  | Yes |



|          |          |      |      |       |              |              |     |
|----------|----------|------|------|-------|--------------|--------------|-----|
| row_1134 | Acsc3    | null | null | 10538 | -103.3729324 | -0.08043692  | Yes |
| row_1135 | Tomm7    | null | null | 10540 | -103.9304123 | -0.07978085  | Yes |
| row_1136 | Mrpl41   | null | null | 10549 | -105.0257263 | -0.07982323  | Yes |
| row_1137 | Minos1   | null | null | 10556 | -106.0631256 | -0.079666056 | Yes |
| row_1138 | Cebpzoz  | null | null | 10558 | -106.1506195 | -0.07900998  | Yes |
| row_1139 | Pfdn2    | null | null | 10559 | -106.2244415 | -0.078254126 | Yes |
| row_1140 | Mrps33   | null | null | 10560 | -106.3042831 | -0.077498265 | Yes |
| row_1141 | Timm9    | null | null | 10569 | -108.0822144 | -0.07754065  | Yes |
| row_1142 | Timm10   | null | null | 10571 | -108.9081802 | -0.076884575 | Yes |
| row_1143 | Yme1l1   | null | null | 10575 | -111.4082108 | -0.076428056 | Yes |
| row_1144 | Ndufb6   | null | null | 10578 | -112.1855392 | -0.07587176  | Yes |
| row_1145 | Mrps36   | null | null | 10582 | -113.0261688 | -0.075415246 | Yes |
| row_1146 | Ndufb9   | null | null | 10586 | -114.2367783 | -0.07495873  | Yes |
| row_1147 | Vamp8    | null | null | 10591 | -115.3288116 | -0.07460199  | Yes |
| row_1148 | Cyb5a    | null | null | 10593 | -115.4785843 | -0.07394591  | Yes |
| row_1149 | Sdhaf4   | null | null | 10599 | -117.0391159 | -0.07368896  | Yes |
| row_1150 | Mrpl27   | null | null | 10604 | -117.6448135 | -0.07333222  | Yes |
| row_1151 | Gng5     | null | null | 10605 | -117.6814728 | -0.07257637  | Yes |
| row_1152 | Tbc1d15  | null | null | 10609 | -118.394722  | -0.07211985  | Yes |
| row_1153 | Triap1   | null | null | 10613 | -119.2129974 | -0.07166333  | Yes |
| row_1154 | Lym7     | null | null | 10618 | -121.4991531 | -0.07130659  | Yes |
| row_1155 | Ndfip2   | null | null | 10621 | -122.4475784 | -0.070750296 | Yes |
| row_1156 | Mrpl12   | null | null | 10623 | -122.7796249 | -0.07009422  | Yes |
| row_1157 | Gstk1    | null | null | 10626 | -122.9423904 | -0.06953792  | Yes |
| row_1158 | Sdhaf3   | null | null | 10630 | -125.882637  | -0.06908141  | Yes |
| row_1159 | Mpc2     | null | null | 10642 | -128.825943  | -0.06942313  | Yes |
| row_1160 | Mterf2   | null | null | 10645 | -129.4467926 | -0.068866834 | Yes |
| row_1161 | Bola3    | null | null | 10646 | -129.4609222 | -0.06811098  | Yes |
| row_1162 | Mthfsl   | null | null | 10655 | -130.8339386 | -0.06815337  | Yes |
| row_1163 | ldh1     | null | null | 10659 | -132.4538422 | -0.06769685  | Yes |
| row_1164 | Mrps10   | null | null | 10666 | -133.4852448 | -0.06753968  | Yes |
| row_1165 | Rmdn3    | null | null | 10677 | -136.1708984 | -0.06778162  | Yes |
| row_1166 | Ngdn     | null | null | 10690 | -139.246582  | -0.068223126 | Yes |
| row_1167 | Sdhd     | null | null | 10691 | -139.5778198 | -0.06746727  | Yes |
| row_1168 | Sri      | null | null | 10692 | -139.7857971 | -0.06671141  | Yes |
| row_1169 | Mrps14   | null | null | 10694 | -141.0014954 | -0.066055335 | Yes |
| row_1170 | Ech1     | null | null | 10712 | -147.0210266 | -0.06699575  | Yes |
| row_1171 | Fis1     | null | null | 10717 | -148.0871277 | -0.06663901  | Yes |
| row_1172 | Rpl34    | null | null | 10718 | -148.569458  | -0.06588315  | Yes |
| row_1173 | Fam136a  | null | null | 10726 | -151.6855164 | -0.06582576  | Yes |
| row_1174 | Acat1    | null | null | 10729 | -152.2902374 | -0.06526946  | Yes |
| row_1175 | Nt5c3    | null | null | 10730 | -152.3727417 | -0.0645136   | Yes |
| row_1176 | Ndufa5   | null | null | 10731 | -152.454422  | -0.06375775  | Yes |
| row_1177 | Cycs     | null | null | 10733 | -152.6729126 | -0.063101664 | Yes |
| row_1178 | Decr1    | null | null | 10734 | -153.1964111 | -0.06234581  | Yes |
| row_1179 | Acot13   | null | null | 10744 | -156.6663666 | -0.062487975 | Yes |
| row_1180 | Adh5     | null | null | 10750 | -159.9565277 | -0.06223102  | Yes |
| row_1181 | Coq7     | null | null | 10752 | -159.9845123 | -0.061574943 | Yes |
| row_1182 | Uqcrcf1  | null | null | 10755 | -160.5681915 | -0.061018646 | Yes |
| row_1183 | Uqcr11   | null | null | 10763 | -162.8999634 | -0.06096125  | Yes |
| row_1184 | Trmt10c  | null | null | 10778 | -169.5286102 | -0.06160232  | Yes |
| row_1185 | Mrpl24   | null | null | 10786 | -171.3456726 | -0.061544925 | Yes |
| row_1186 | Pdxb     | null | null | 10788 | -173.1611633 | -0.06088885  | Yes |
| row_1187 | Bbox1    | null | null | 10791 | -175.2691956 | -0.06033255  | Yes |
| row_1188 | Bnip3l   | null | null | 10792 | -175.5288544 | -0.059576694 | Yes |
| row_1189 | Mrpl18   | null | null | 10794 | -175.7474976 | -0.058920614 | Yes |
| row_1190 | Rida     | null | null | 10802 | -178.0277252 | -0.058863223 | Yes |
| row_1191 | Agpat5   | null | null | 10805 | -178.5522461 | -0.058306925 | Yes |
| row_1192 | Ndufs6   | null | null | 10812 | -181.0307159 | -0.05814975  | Yes |
| row_1193 | Mtrf1l   | null | null | 10827 | -189.5698547 | -0.058790818 | Yes |
| row_1194 | Grpel1   | null | null | 10828 | -190.0778809 | -0.05803496  | Yes |
| row_1195 | Lym2     | null | null | 10834 | -193.1143646 | -0.057778005 | Yes |
| row_1196 | Nudt19   | null | null | 10843 | -197.8856201 | -0.05782039  | Yes |
| row_1197 | Ociad2   | null | null | 10844 | -198.9339142 | -0.057064533 | Yes |
| row_1198 | Lym4     | null | null | 10866 | -212.6182556 | -0.058404066 | Yes |
| row_1199 | Tmem126a | null | null | 10879 | -219.2784119 | -0.058845572 | Yes |
| row_1200 | Ccdc90b  | null | null | 10881 | -219.7425537 | -0.058189496 | Yes |

|          |               |      |      |       |              |              |     |
|----------|---------------|------|------|-------|--------------|--------------|-----|
| row_1201 | Mrpl54        | null | null | 10882 | -220.9447937 | -0.05743364  | Yes |
| row_1202 | Uqcrb         | null | null | 10884 | -221.0401459 | -0.05677756  | Yes |
| row_1203 | 1110008F13Rik | null | null | 10890 | -225.6994019 | -0.056520604 | Yes |
| row_1204 | Vdac3         | null | null | 10895 | -227.7704315 | -0.05616387  | Yes |
| row_1205 | Mrpl47        | null | null | 10898 | -228.3879852 | -0.055607572 | Yes |
| row_1206 | Ndufb4        | null | null | 10900 | -230.1529541 | -0.054951496 | Yes |
| row_1207 | Qdpr          | null | null | 10913 | -240.8872681 | -0.055393003 | Yes |
| row_1208 | Etfa          | null | null | 10914 | -241.0535583 | -0.054637145 | Yes |
| row_1209 | Mrps21        | null | null | 10920 | -245.4321136 | -0.05438019  | Yes |
| row_1210 | mt-Cytb       | null | null | 10927 | -249.171875  | -0.054223016 | Yes |
| row_1211 | Romo1         | null | null | 10929 | -251.1148987 | -0.053566936 | Yes |
| row_1212 | Tomm5         | null | null | 10933 | -252.4406128 | -0.05311042  | Yes |
| row_1213 | Tmem126b      | null | null | 10940 | -255.2789154 | -0.052953247 | Yes |
| row_1214 | Txn1          | null | null | 10947 | -262.6124268 | -0.05279607  | Yes |
| row_1215 | Fastkd2       | null | null | 10952 | -266.7426758 | -0.052439336 | Yes |
| row_1216 | Dld           | null | null | 10957 | -270.6190186 | -0.0520826   | Yes |
| row_1217 | Mff           | null | null | 10958 | -272.1513977 | -0.05132674  | Yes |
| row_1218 | Atp5j         | null | null | 10962 | -273.1491089 | -0.050870225 | Yes |
| row_1219 | Rps14         | null | null | 10969 | -279.6862183 | -0.050713047 | Yes |
| row_1220 | Smim4         | null | null | 10970 | -280.773468  | -0.04995719  | Yes |
| row_1221 | 2410015M20Rik | null | null | 10972 | -282.0343323 | -0.049301114 | Yes |
| row_1222 | Emc2          | null | null | 10973 | -282.3363037 | -0.048545256 | Yes |
| row_1223 | Ndufs8        | null | null | 10979 | -287.3091125 | -0.0482883   | Yes |
| row_1224 | Vps35         | null | null | 10982 | -288.8184204 | -0.047732003 | Yes |
| row_1225 | Uqcrh         | null | null | 10985 | -289.26828   | -0.047175705 | Yes |
| row_1226 | Ndufa12       | null | null | 10988 | -291.8304443 | -0.046619408 | Yes |
| row_1227 | C330018D20Rik | null | null | 10989 | -292.0364685 | -0.04586355  | Yes |
| row_1228 | Ndufab1       | null | null | 10992 | -294.145874  | -0.045307253 | Yes |
| row_1229 | Ndufa6        | null | null | 10994 | -297.1447754 | -0.044651177 | Yes |
| row_1230 | mt-Co1        | null | null | 10995 | -297.6434631 | -0.04389532  | Yes |
| row_1231 | Atp5l         | null | null | 11001 | -305.8949585 | -0.043638363 | Yes |
| row_1232 | Ndufv3        | null | null | 11008 | -310.8027344 | -0.04348119  | Yes |
| row_1233 | Mrpl42        | null | null | 11017 | -321.1486816 | -0.043523576 | Yes |
| row_1234 | Atp5e         | null | null | 11018 | -323.6139526 | -0.042767715 | Yes |
| row_1235 | Rab29         | null | null | 11020 | -324.2150879 | -0.042111164 | Yes |
| row_1236 | Ndufb3        | null | null | 11023 | -326.5795898 | -0.04155534  | Yes |
| row_1237 | Ndufc1        | null | null | 11033 | -334.5463867 | -0.04169751  | Yes |
| row_1238 | Cbr4          | null | null | 11041 | -340.0866089 | -0.041640114 | Yes |
| row_1239 | Mrpl22        | null | null | 11042 | -341.1478577 | -0.040884256 | Yes |
| row_1240 | Hspe1         | null | null | 11046 | -346.5660095 | -0.04042774  | Yes |
| row_1241 | Hddc2         | null | null | 11050 | -350.5193481 | -0.039971225 | Yes |
| row_1242 | Uqcrcq        | null | null | 11051 | -351.4783325 | -0.039215364 | Yes |
| row_1243 | Slirp         | null | null | 11053 | -354.5403137 | -0.038559288 | Yes |
| row_1244 | Cox6b1        | null | null | 11058 | -360.0204468 | -0.03820255  | Yes |
| row_1245 | Ndufa7        | null | null | 11061 | -366.0018311 | -0.037646256 | Yes |
| row_1246 | Cox6c         | null | null | 11064 | -368.4577637 | -0.03708996  | Yes |
| row_1247 | Fdx1l         | null | null | 11067 | -372.1758423 | -0.03653366  | Yes |
| row_1248 | Atp5j2        | null | null | 11069 | -372.3390808 | -0.035877585 | Yes |
| row_1249 | Mcee          | null | null | 11073 | -375.6546326 | -0.035421066 | Yes |
| row_1250 | Them4         | null | null | 11079 | -381.8096924 | -0.03516411  | Yes |
| row_1251 | Hibch         | null | null | 11081 | -382.0937195 | -0.034508035 | Yes |
| row_1252 | Ndufa2        | null | null | 11084 | -385.3541565 | -0.033951737 | Yes |
| row_1253 | Scp2          | null | null | 11099 | -403.3277893 | -0.034592807 | Yes |
| row_1254 | Prdx1         | null | null | 11101 | -405.9992371 | -0.033936728 | Yes |
| row_1255 | mt-Rnr2       | null | null | 11107 | -413.6788635 | -0.033679772 | Yes |
| row_1256 | Ndufa4        | null | null | 11108 | -414.8104553 | -0.032923914 | Yes |
| row_1257 | Acyp2         | null | null | 11115 | -423.4879456 | -0.03276674  | Yes |
| row_1258 | Atp5h         | null | null | 11118 | -425.3863831 | -0.032210443 | Yes |
| row_1259 | Pts           | null | null | 11124 | -431.2923889 | -0.031953488 | Yes |
| row_1260 | Cox5b         | null | null | 11126 | -433.5984192 | -0.03129741  | Yes |
| row_1261 | Chchd3        | null | null | 11127 | -435.0106812 | -0.030541552 | Yes |
| row_1262 | Cox6a1        | null | null | 11128 | -436.5970764 | -0.029785695 | Yes |
| row_1263 | Ndufb5        | null | null | 11135 | -453.8414307 | -0.029628519 | Yes |
| row_1264 | Crls1         | null | null | 11136 | -454.217926  | -0.028872661 | Yes |
| row_1265 | Cox7c         | null | null | 11139 | -462.2252197 | -0.028316366 | Yes |
| row_1266 | Atpif1        | null | null | 11141 | -467.4630127 | -0.027660288 | Yes |
| row_1267 | Ndufc2        | null | null | 11145 | -476.1025696 | -0.02720377  | Yes |

|          |               |      |      |       |              |              |     |
|----------|---------------|------|------|-------|--------------|--------------|-----|
| row_1268 | Mrpl30        | null | null | 11147 | -485.053894  | -0.026547693 | Yes |
| row_1269 | Ndufs4        | null | null | 11154 | -502.0514526 | -0.026390519 | Yes |
| row_1270 | mt-Rnr1       | null | null | 11155 | -509.6646729 | -0.025634661 | Yes |
| row_1271 | Mrpl13        | null | null | 11158 | -511.0132446 | -0.025078364 | Yes |
| row_1272 | Nit2          | null | null | 11165 | -533.8369141 | -0.024921188 | Yes |
| row_1273 | Coa6          | null | null | 11167 | -535.1019897 | -0.02426511  | Yes |
| row_1274 | Cox7a2        | null | null | 11172 | -542.3001709 | -0.023908375 | Yes |
| row_1275 | Mrpl52        | null | null | 11173 | -546.9841919 | -0.023152517 | Yes |
| row_1276 | Mgst1         | null | null | 11174 | -550.0083008 | -0.02239666  | Yes |
| row_1277 | Idi1          | null | null | 11177 | -568.5610962 | -0.021840362 | Yes |
| row_1278 | Timm8b        | null | null | 11179 | -572.4307861 | -0.021184284 | Yes |
| row_1279 | Cox8a         | null | null | 11189 | -609.3577271 | -0.02132645  | Yes |
| row_1280 | Mrpl48        | null | null | 11190 | -613.0897827 | -0.020570593 | Yes |
| row_1281 | Sugct         | null | null | 11194 | -623.5093384 | -0.020114077 | Yes |
| row_1282 | Fam162a       | null | null | 11195 | -625.0778809 | -0.01935822  | Yes |
| row_1283 | Coq2          | null | null | 11196 | -627.296814  | -0.018602362 | Yes |
| row_1284 | Uqcc2         | null | null | 11198 | -650.5671387 | -0.017946284 | Yes |
| row_1285 | Echdc2        | null | null | 11199 | -651.3895264 | -0.017190427 | Yes |
| row_1286 | Fth1          | null | null | 11202 | -659.2412109 | -0.016634129 | Yes |
| row_1287 | Usmg5         | null | null | 11203 | -659.8202515 | -0.015878271 | Yes |
| row_1288 | Mtx2          | null | null | 11210 | -702.46875   | -0.015721096 | Yes |
| row_1289 | 2010107E04Rik | null | null | 11213 | -704.3325195 | -0.015164799 | Yes |
| row_1290 | Sucla2        | null | null | 11214 | -710.5256958 | -0.014408941 | Yes |
| row_1291 | Gpx4          | null | null | 11217 | -724.1456299 | -0.013852644 | Yes |
| row_1292 | Chchd2        | null | null | 11218 | -726.7298584 | -0.013096786 | Yes |
| row_1293 | Cox14         | null | null | 11219 | -729.1559448 | -0.012340928 | Yes |
| row_1294 | Echdc1        | null | null | 11223 | -747.9562988 | -0.011884412 | Yes |
| row_1295 | Mpc1          | null | null | 11226 | -788.2207031 | -0.011328115 | Yes |
| row_1296 | Mdh1          | null | null | 11230 | -810.9002075 | -0.010871599 | Yes |
| row_1297 | Mrpl36        | null | null | 11231 | -811.0979004 | -0.010115741 | Yes |
| row_1298 | Mrpl1         | null | null | 11233 | -831.3317261 | -0.009459663 | Yes |
| row_1299 | Mterf3        | null | null | 11235 | -833.3121338 | -0.008803586 | Yes |
| row_1300 | Higd1a        | null | null | 11236 | -843.5780029 | -0.008047728 | Yes |
| row_1301 | Dynl1         | null | null | 11241 | -873.329834  | -0.007690992 | Yes |
| row_1302 | Bnip3         | null | null | 11243 | -876.8321533 | -0.007034915 | Yes |
| row_1303 | Ndufa3        | null | null | 11245 | -892.0710449 | -0.006378837 | Yes |
| row_1304 | Uqcr10        | null | null | 11250 | -926.0384521 | -0.006022101 | Yes |
| row_1305 | Tmem256       | null | null | 11254 | -955.6976318 | -0.005565585 | Yes |
| row_1306 | Prdx3         | null | null | 11255 | -956.8841553 | -0.004809727 | Yes |
| row_1307 | Ndufv2        | null | null | 11257 | -971.1478271 | -0.004153649 | Yes |
| row_1308 | Pam16         | null | null | 11258 | -974.7127686 | -0.003397791 | Yes |
| row_1309 | Dbi           | null | null | 11262 | -1083.3573   | -0.002941275 | Yes |
| row_1310 | mt-Nd6        | null | null | 11264 | -1101.637085 | -0.002285197 | Yes |
| row_1311 | Hint2         | null | null | 11273 | -1291.182373 | -0.002327583 | Yes |
| row_1312 | Atp5f1        | null | null | 11281 | -1457.118286 | -0.002270189 | Yes |
| row_1313 | Atp5s         | null | null | 11282 | -1463.586914 | -0.001514331 | Yes |
| row_1314 | Tefm          | null | null | 11285 | -1530.48584  | -9.58E-04    | Yes |
| row_1315 | Yars2         | null | null | 11296 | -1858.709961 | -0.001199981 | Yes |
| row_1316 | Mtrf1         | null | null | 11301 | -1992.6427   | -8.43E-04    | Yes |
| row_1317 | Pfdn4         | null | null | 11306 | -2174.711182 | -4.87E-04    | Yes |
| row_1318 | Immmp1l       | null | null | 11309 | -2341.505127 | 6.98E-05     | Yes |
| row_1319 | Mthfd2l       | null | null | 11312 | -2691.698242 | 6.26E-04     | Yes |
| row_1320 | Mrps22        | null | null | 11326 | -6304.582031 | 8.48E-05     | Yes |
| row_1321 | Ankrd37       | null | null | 11338 | -21064.36914 | -2.57E-04    | Yes |
| row_1322 | Dtymk         | null | null | 11341 | -107098.7656 | 2.99E-04     | Yes |

**Humanised mutant FUS drives progressive motor neuron degeneration without aggregation in 'FUSDelta14' knockin mice**  
**Devoy et al. 2017**

**Supplementary Table 8** Gene Set Enrichment Analysis (GSEA) **Mitochondrial respiratory chain** - list of genes dysregulated at 12 months of age in I

| NAME   | PROBE   | GENE SYMBOL | GENE_TITLE | RANK IN GENE LIST | RANK METRIC SCORE | RUNNING ES   | CORE ENRICHMENT |
|--------|---------|-------------|------------|-------------------|-------------------|--------------|-----------------|
| row_0  | Sdha    | null        | null       | 3649              | 4.021390915       | -0.30637178  | No              |
| row_1  | Ndufv1  | null        | null       | 4416              | 2.484201193       | -0.35729432  | No              |
| row_2  | Uqcrc1  | null        | null       | 4584              | 2.235046864       | -0.35514227  | No              |
| row_3  | Ndufa10 | null        | null       | 5737              | 1.191801667       | -0.4402665   | No              |
| row_4  | Ndufs2  | null        | null       | 5952              | 1.079359531       | -0.4422789   | No              |
| row_5  | Ndufs1  | null        | null       | 5965              | 1.070915699       | -0.426393    | No              |
| row_6  | Foxred1 | null        | null       | 6175              | -1.02528739       | -0.42796236  | No              |
| row_7  | Ndufs3  | null        | null       | 6847              | -1.457847953      | -0.4704674   | No              |
| row_8  | Pmpcb   | null        | null       | 8028              | -3.731791258      | -0.55807257  | Yes             |
| row_9  | Cyc1    | null        | null       | 8053              | -3.818825006      | -0.5432499   | Yes             |
| row_10 | Uqcc3   | null        | null       | 8148              | -4.184010506      | -0.5346297   | Yes             |
| row_11 | Ndufs7  | null        | null       | 8482              | -6.047410011      | -0.54718614  | Yes             |
| row_12 | Ndufa9  | null        | null       | 8773              | -8.412945747      | -0.5559325   | Yes             |
| row_13 | Cox5a   | null        | null       | 8790              | -8.647891998      | -0.54040104  | Yes             |
| row_14 | Cox7a1  | null        | null       | 9050              | -11.77324963      | -0.54640067  | Yes             |
| row_15 | Park7   | null        | null       | 9289              | -15.90094566      | -0.5505396   | Yes             |
| row_16 | Sdhc    | null        | null       | 9437              | -19.20131493      | -0.5466154   | Yes             |
| row_17 | Ndufs5  | null        | null       | 9517              | -21.03370476      | -0.5366661   | Yes             |
| row_18 | Ndufb10 | null        | null       | 9634              | -24.98407745      | -0.5299952   | Yes             |
| row_19 | Ndufa11 | null        | null       | 9890              | -35.52186966      | -0.5356404   | Yes             |
| row_20 | Sdhb    | null        | null       | 9906              | -36.68238068      | -0.5200203   | Yes             |
| row_21 | Uqcrc2  | null        | null       | 10089             | -48.59988403      | -0.51919734  | Yes             |
| row_22 | Cox4i1  | null        | null       | 10135             | -51.9659996       | -0.5062354   | Yes             |
| row_23 | Ndufb7  | null        | null       | 10306             | -70.14627838      | -0.5043492   | Yes             |
| row_24 | Ndufa8  | null        | null       | 10411             | -81.88077545      | -0.496615    | Yes             |
| row_25 | Ndufa13 | null        | null       | 10427             | -84.91810608      | -0.4809949   | Yes             |
| row_26 | Cox7a2l | null        | null       | 10482             | -94.97776794      | -0.46883047  | Yes             |
| row_27 | Ndufb6  | null        | null       | 10578             | -112.1855392      | -0.4602988   | Yes             |
| row_28 | Ndufb9  | null        | null       | 10586             | -114.2367783      | -0.4439699   | Yes             |
| row_29 | Sdhd    | null        | null       | 10691             | -139.5778198      | -0.4362357   | Yes             |
| row_30 | Ndufa5  | null        | null       | 10731             | -152.454422       | -0.42274216  | Yes             |
| row_31 | Uqcrcs1 | null        | null       | 10755             | -160.5681915      | -0.40783092  | Yes             |
| row_32 | Ndufs6  | null        | null       | 10812             | -181.0307159      | -0.39584368  | Yes             |
| row_33 | Uqcrb   | null        | null       | 10884             | -221.0401459      | -0.3851855   | Yes             |
| row_34 | Ndufb4  | null        | null       | 10900             | -230.1529541      | -0.36956543  | Yes             |
| row_35 | Ndufs8  | null        | null       | 10979             | -287.3091125      | -0.3595275   | Yes             |
| row_36 | Uqcrh   | null        | null       | 10985             | -289.26828        | -0.34302136  | Yes             |
| row_37 | Ndufa12 | null        | null       | 10988             | -291.8304443      | -0.32624942  | Yes             |
| row_38 | Ndufab1 | null        | null       | 10992             | -294.145874       | -0.30956608  | Yes             |
| row_39 | Ndufa6  | null        | null       | 10994             | -297.1447754      | -0.29270554  | Yes             |
| row_40 | mt-Co1  | null        | null       | 10995             | -297.6434631      | -0.2757564   | Yes             |
| row_41 | Ndufv3  | null        | null       | 11008             | -310.8027344      | -0.2598705   | Yes             |
| row_42 | Ndufb3  | null        | null       | 11023             | -326.5795898      | -0.24416181  | Yes             |
| row_43 | Ndufc1  | null        | null       | 11033             | -334.5463867      | -0.22801012  | Yes             |
| row_44 | Uqcrcq  | null        | null       | 11051             | -351.4783325      | -0.21256725  | Yes             |
| row_45 | Ndufa7  | null        | null       | 11061             | -366.0018311      | -0.19641556  | Yes             |
| row_46 | Ndufa2  | null        | null       | 11084             | -385.3541565      | -0.18141572  | Yes             |
| row_47 | Ndufa4  | null        | null       | 11108             | -414.8104553      | -0.16650449  | Yes             |
| row_48 | Cox5b   | null        | null       | 11126             | -433.5984192      | -0.15106162  | Yes             |
| row_49 | Cox6a1  | null        | null       | 11128             | -436.5970764      | -0.13420108  | Yes             |
| row_50 | Ndufb5  | null        | null       | 11135             | -453.8414307      | -0.11778356  | Yes             |
| row_51 | Cox7c   | null        | null       | 11139             | -462.2252197      | -0.10110022  | Yes             |
| row_52 | Ndufc2  | null        | null       | 11145             | -476.1025696      | -0.08459409  | Yes             |
| row_53 | Ndufs4  | null        | null       | 11154             | -502.0514526      | -0.06835379  | Yes             |
| row_54 | Cox7a2  | null        | null       | 11172             | -542.3001709      | -0.052910924 | Yes             |
| row_55 | Cox8a   | null        | null       | 11189             | -609.3577271      | -0.03737946  | Yes             |
| row_56 | Ndufa3  | null        | null       | 11245             | -892.0710449      | -0.025303598 | Yes             |
| row_57 | Uqcrc10 | null        | null       | 11250             | -926.0384521      | -0.008708868 | Yes             |
| row_58 | Ndufv2  | null        | null       | 11257             | -971.1478271      | 0.007708653  | Yes             |

FUS Delta14 spinal cord.

**Humanised mutant FUS drives progressive motor neuron degeneration without aggregation in 'FUSDelta14' knockin mice**  
**Devoy et al. 2017**

**Supplementary Table 9** Gene Set Enrichment Analysis (GSEA) **Proteasome Core Complex** - list of genes dysregulated at 12 months of age in FUS

| NAME   | PROBE  | GENE SYMBOL | GENE_TITLE | RANK IN GENE LIST | RANK METRIC SCORE | RUNNING ES  | CORE ENRICHMENT |
|--------|--------|-------------|------------|-------------------|-------------------|-------------|-----------------|
| row_0  | Alad   | null        | null       | 4457              | 2.415877342       | -0.33462632 | No              |
| row_1  | Psmb8  | null        | null       | 7485              | -2.314165592      | -0.5430168  | No              |
| row_2  | Psmc4  | null        | null       | 8867              | -9.392008781      | -0.60610354 | Yes             |
| row_3  | Psmc7  | null        | null       | 8950              | -10.50782394      | -0.55451876 | Yes             |
| row_4  | Psmc10 | null        | null       | 9104              | -12.60319042      | -0.5092016  | Yes             |
| row_5  | Psmc2  | null        | null       | 9335              | -16.95043755      | -0.4706817  | Yes             |
| row_6  | Psmc6  | null        | null       | 9773              | -30.09322166      | -0.45043516 | Yes             |
| row_7  | Psmc4  | null        | null       | 9833              | -32.73668671      | -0.39681995 | Yes             |
| row_8  | Psmc4  | null        | null       | 10624             | -122.8734818      | -0.40773514 | Yes             |
| row_9  | Psmc3  | null        | null       | 10701             | -143.6298981      | -0.35562065 | Yes             |
| row_10 | Psmc2  | null        | null       | 10862             | -211.6173859      | -0.3109214  | Yes             |
| row_11 | Psmc3  | null        | null       | 11048             | -347.6372681      | -0.2684291  | Yes             |
| row_12 | Psmc5  | null        | null       | 11068             | -372.2513428      | -0.21128282 | Yes             |
| row_13 | Psmc6  | null        | null       | 11080             | -381.8269043      | -0.15343033 | Yes             |
| row_14 | Psmc1  | null        | null       | 11133             | -450.9679565      | -0.0991972  | Yes             |
| row_15 | Psmc7  | null        | null       | 11178             | -569.8171997      | -0.04425785 | Yes             |
| row_16 | Psmc1  | null        | null       | 11253             | -945.2886353      | 0.008033194 | Yes             |

Delta14 spinal cord.

**Humanised mutant FUS drives progressive motor neuron degeneration without aggregation in 'FUSDelta14' knockin mice**  
**Devoy et al. 201**

**Supplementary Table 10** Gene Set Enrichment Analysis (GSEA) **Proteasome core complex - alpha subunit complex** - list of genes dysregulate at 12 months of age in FUS Delta14 spinal cord.

| NAME  | PROBE | GENE SYMBOL | GENE_TITLE | RANK IN GENE LIST | RANK METRIC SCORE | RUNNING ES   | CORE ENRICHMENT |
|-------|-------|-------------|------------|-------------------|-------------------|--------------|-----------------|
| row_0 | Psma7 | null        | null       | 8950              | -10.50782394      | -0.6465237   | No              |
| row_1 | Psma4 | null        | null       | 10624             | -122.8734818      | -0.6512234   | Yes             |
| row_2 | Psma2 | null        | null       | 10862             | -211.6173859      | -0.52926946  | Yes             |
| row_3 | Psma3 | null        | null       | 11048             | -347.6372681      | -0.4027291   | Yes             |
| row_4 | Psma5 | null        | null       | 11068             | -372.2513428      | -0.2615477   | Yes             |
| row_5 | Psma6 | null        | null       | 11080             | -381.8269043      | -0.119660765 | Yes             |
| row_6 | Psma1 | null        | null       | 11253             | -945.2886353      | 0.008026158  | Yes             |
